# Supplementary material for: The first dehydration and the competing reaction pathways of glucose homogeneously and heterogeneously catalyzed by acids
Source: Royal Society of Chemistry journal article supplement (doi:10.1039/c2cp43644b), 2013-01-01
Supplement: c2cp43644b.pdf [file c2cp43644b.pdf]

## Supporting information

### The First Dehydration and the Competing Reaction Pathways of Glucose Homogeneously and Heterogeneously Catalyzed by Acids

Xufeng Lin<sup>1,2,3\*</sup>, Yuanyuan Qu<sup>2,4</sup>, Yanhong Lu<sup>2,4</sup>, Yanyan Xi<sup>1,4</sup>,

David L. Phillips<sup>5</sup>, Chenguang Liu<sup>1,2,4</sup>

<sup>1</sup>State Key Laboratory of Heavy Oil Processing, <sup>2</sup>Key Laboratory of Catalysis of China National Petroleum Corporation, <sup>3</sup>Chemistry Department, <sup>4</sup>College of Chemical Engineering, China University of Petroleum (East China), Qingdao, P. R. China, 266555

<sup>5</sup>Department of Chemistry, The University of Hong Kong, Pokfulam Road, Hong Kong, P. R. China

#### Table of Contents:

|                |         |
|----------------|---------|
| Figure 1S..... | Page S2 |
| Table 1S.....  | Page S3 |
| Figure 2S..... | Page S4 |
| Figure 3S..... | Page S5 |
| Figure 4S..... | Page S6 |
| Figure 5S..... | Page S7 |
| Figure 6S..... | Page S8 |

|                               |          |
|-------------------------------|----------|
| Figure 7S.....                | Page S9  |
| Figure 8S.....                | Page S10 |
| Figure 9S.....                | Page S11 |
| Figure 10S.....               | Page S12 |
| Figure 11S.....               | Page S13 |
| Figure 12S.....               | Page S14 |
| Full citation of Ref. 50 .... | Page S15 |

Cartesian coordinates, ZPE corrected energy, enthalpy (298K), free energy (298K) for all the optimized structures reported in the manuscript and in the supporting information.....Page S16-S51.

**Figure 1S.** The model reaction for the benchmark work for selection of appropriate computational level of theory:  
dehydration of protonated isopropanol.

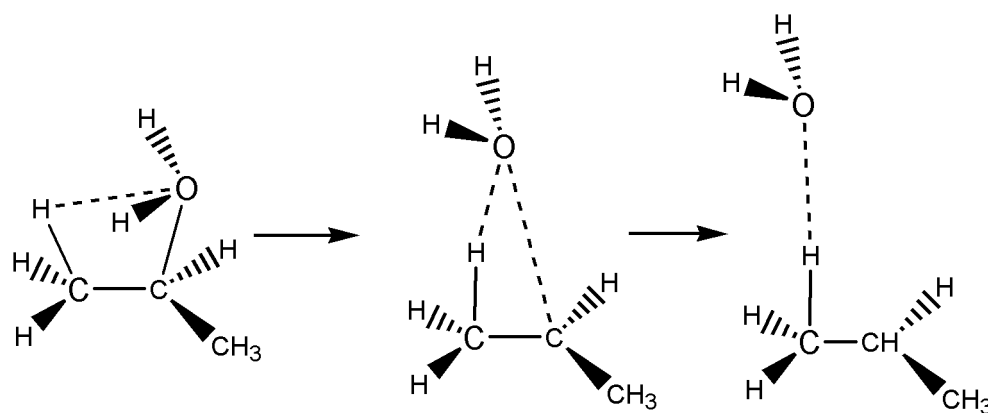

**Table 1S.**

Calculated reaction energy barrier for the model reaction indicated in Figure 1S with different levels of theory.

| Level of theory<br>(with gas-phase model)              | Energy barrier<br>(in kcal/mol) | Level of theory<br>(in aqueous solution) | Energy barrier<br>(in kcal/mol) |
|--------------------------------------------------------|---------------------------------|------------------------------------------|---------------------------------|
| B3LYP/6-31G(d)                                         | 10.7                            |                                          |                                 |
| B3LYP/6-311G(d,p)                                      | 7.7                             |                                          |                                 |
| B3LYP/6-31+G(d,p)                                      | 6.3                             |                                          |                                 |
| B3LYP/6-311++G(d,p)                                    | 5.4                             |                                          |                                 |
| B3LYP/aug-cc-pvdz                                      | 6.5                             |                                          |                                 |
| B3LYP/aug-cc-pvtz                                      | 6.0                             |                                          |                                 |
| BLYP/6-31G(d)                                          | 8.7                             |                                          |                                 |
| BLYP/6-311G(d,p)                                       | 6.0                             |                                          |                                 |
| BLYP/6-31+G(d,p)                                       | 4.2                             |                                          |                                 |
| BLYP/6-311++G(d,p)                                     | 3.4                             |                                          |                                 |
| BLYP/aug-cc-pvdz                                       | 4.6                             |                                          |                                 |
| BLYP/aug-cc-pvtz                                       | 3.9                             |                                          |                                 |
| MP2/6-31G(d)                                           | 15.2                            |                                          |                                 |
| MP2/6-311G(d,p)                                        | 13.8                            |                                          |                                 |
| MP2/6-31+G(d,p)                                        | 11.1                            |                                          |                                 |
| MP2/6-311++G(d,p)                                      | 11.3                            |                                          |                                 |
| MP2/aug-cc-pvdz                                        | 11.4                            |                                          |                                 |
| MP2/aug-cc-pvtz <sup>a</sup>                           | 11.7                            |                                          |                                 |
| B3LYP/6-31+G(d,p)                                      | 6.3                             | B3LYP/6-31+G(d,p)                        | 13.4                            |
| MP2/6-31+G(d,p)                                        | 11.1                            | MP2/6-31+G(d,p)                          | 19.2                            |
| BLYP/6-31+G(d,p)                                       | 4.2                             | BLYP/6-31+G(d,p)                         | 10.8                            |
| M06/6-31+G(d,p)                                        | 6.9                             | M06/6-31+G(d,p)                          | 14.1                            |
| M06-2X/6-31+G(d,p)                                     | 12.0                            | M06-2X/6-31+G(d,p)                       | 20.3                            |
| CCSD/6-31+G(d,p)                                       | 11.9                            |                                          |                                 |
| CCSD(T)/6-31+G(d,p)//<br>CCSD/6-31+G(d,p) <sup>b</sup> | 11.9                            |                                          |                                 |
| CCSD(T)/aug-cc-pvtz//<br>CCSD/6-31+G(d,p) <sup>c</sup> | 12.0                            |                                          |                                 |

<sup>a</sup>The ZPE energy of MP2/aug-cc-pvdz is used.

<sup>b, c</sup>The CCSD(T) single-point energy was calculated based on the geometry obtained from the CCSD method.

**Figure 2S.** The energy profiles for the approaching of H(A) atom in the hydrated proton to different hydroxyl groups in  $\beta$ -glucopyranose, presented in panels (a) for O(1) site, (b) for O(2) site, and (c) for O(5) site. The O(1)...H(A) distance was fixed while other part were allow the relax to locate the energy minimum. Computational method: PCM/BONDI//M062X/6-31+G\*\*.

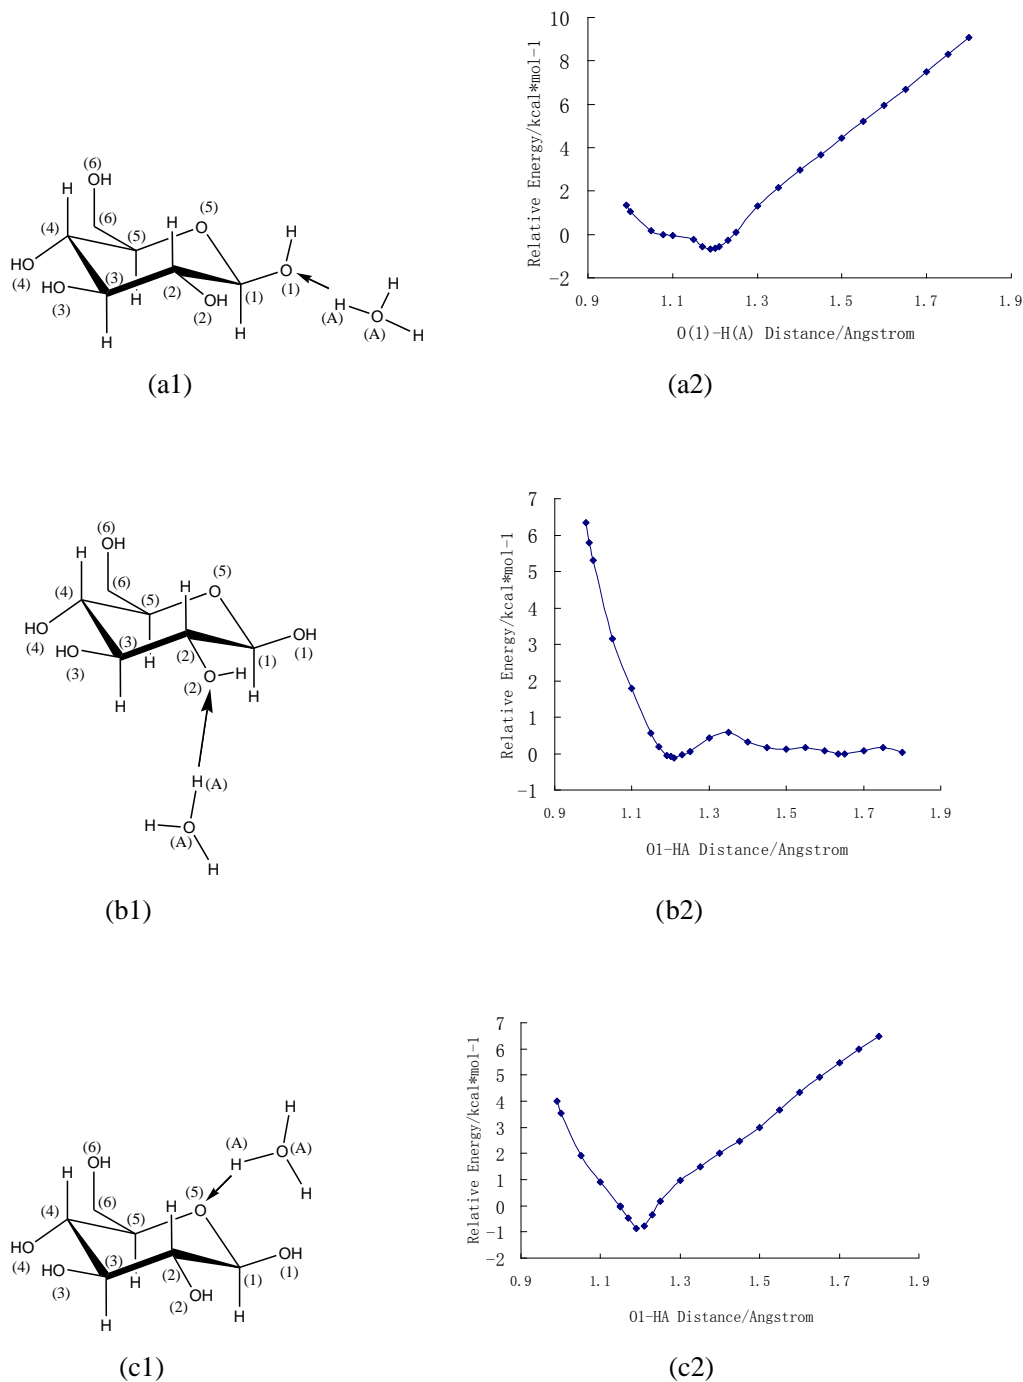

**Figure 3S.** Simple scheme for the optimized geometries for the species involved in the five dehydration reaction pathways of protonated  $\beta$ -glucopyranose, with 1 water molecule incorporated into the reaction systems. Key distances are indicated in Å. The line between atoms only represents connection here and in Figures 4S ~6S, not bonding order. See Scheme 2a for the  $n = 1,2,3,4,6$  cases, and text for the notation of **RC-n-BP-kW**, **TS-n-BP-kW**, **PC-n-BP-kW** as well.

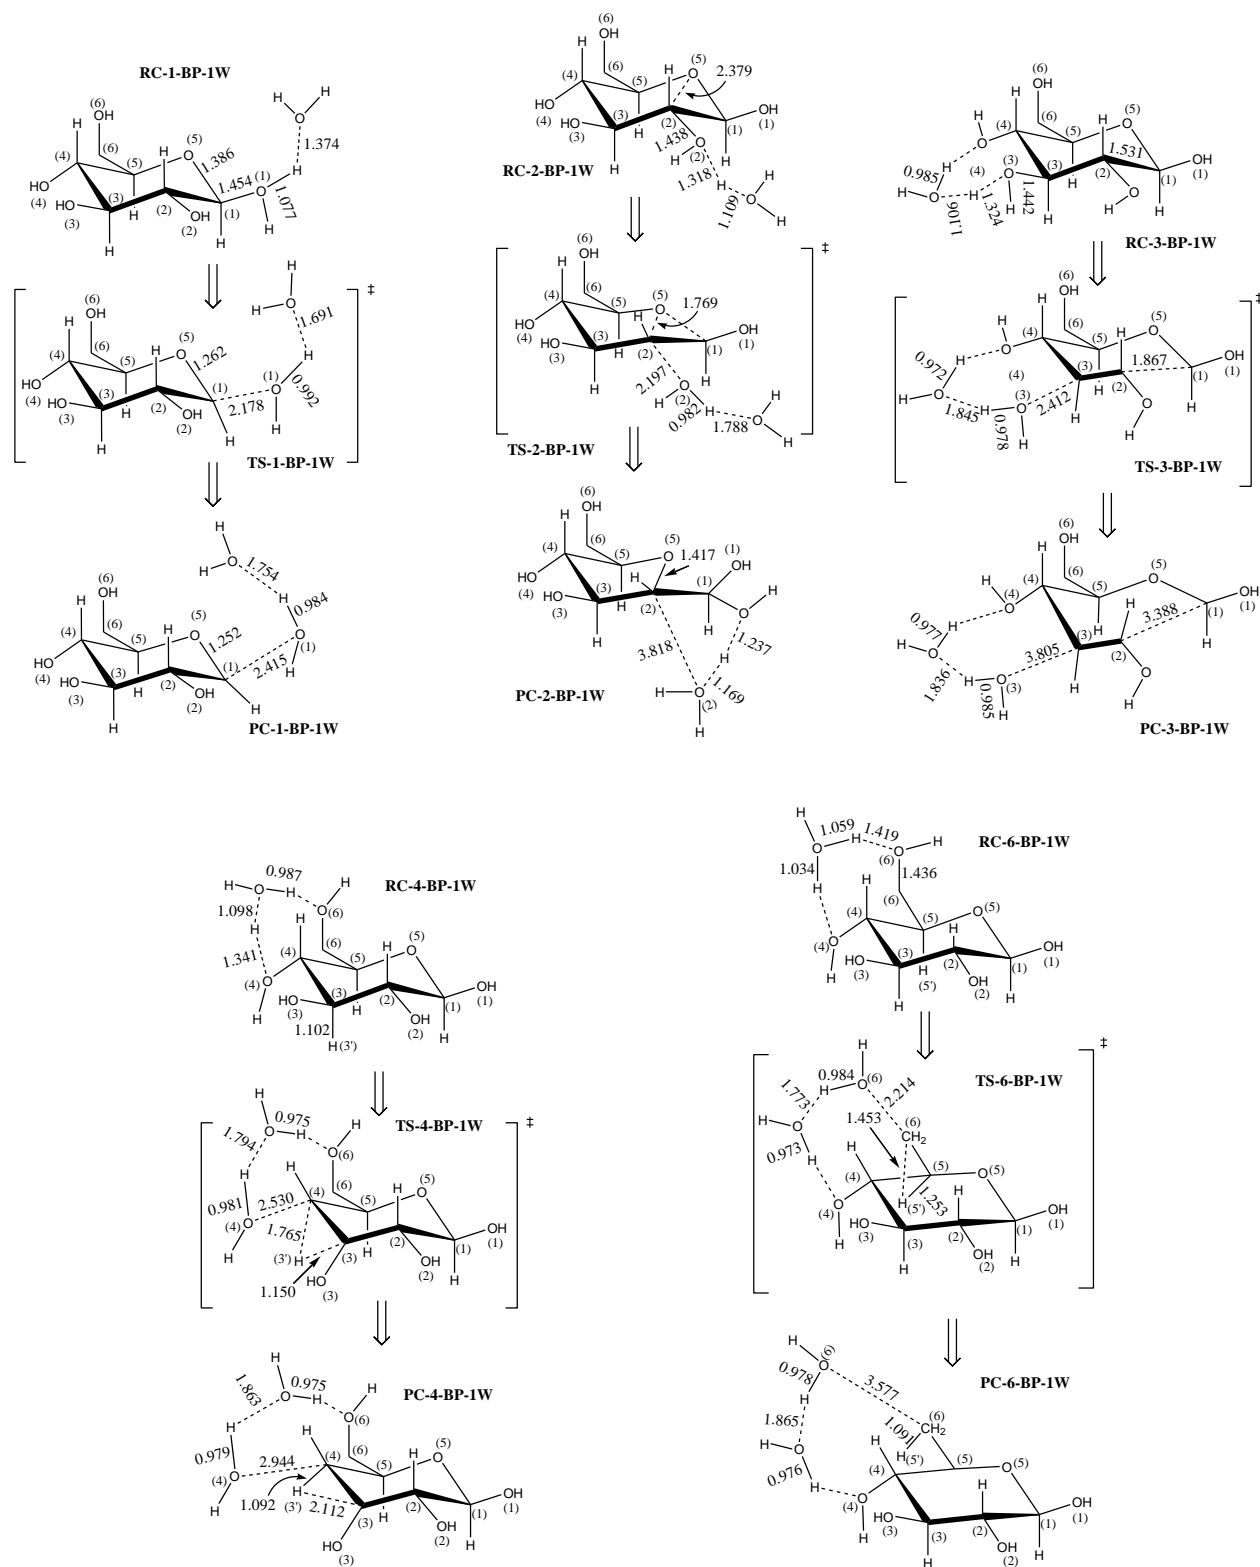

**Figure 4S.** Simple scheme for the optimized geometries for the species involved in the two isomerization reaction pathways of protonated  $\beta$ -glucopyranose, with 1 water molecule incorporated into the reaction systems. Key distances are indicated in Å. See Scheme 2a for the  $n = 5-1$  and  $5-2$  cases, and text for the notation of **RC-n-BP-kW**, **TS-n-BP-kW**, **PC-n-BP-kW** as well.

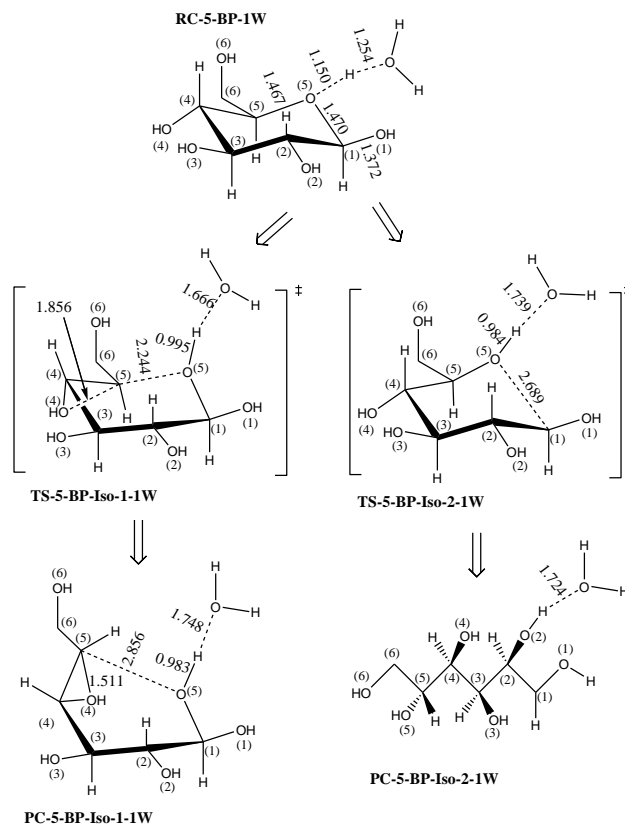

**Figure 5S.** Simple scheme for the optimized geometries for the species involved in the five dehydration reaction pathways of protonated  $\beta$ -glucopyranose, with 2 water molecules incorporated into the reaction systems. Key distances are indicated in Å. See Scheme 2a for the  $n = 1, 2, 3, 4, 6$  cases, and text for the notation of **RC-n-BP-kW**, **TS-n-BP-kW**, **PC-n-BP-kW** as well.

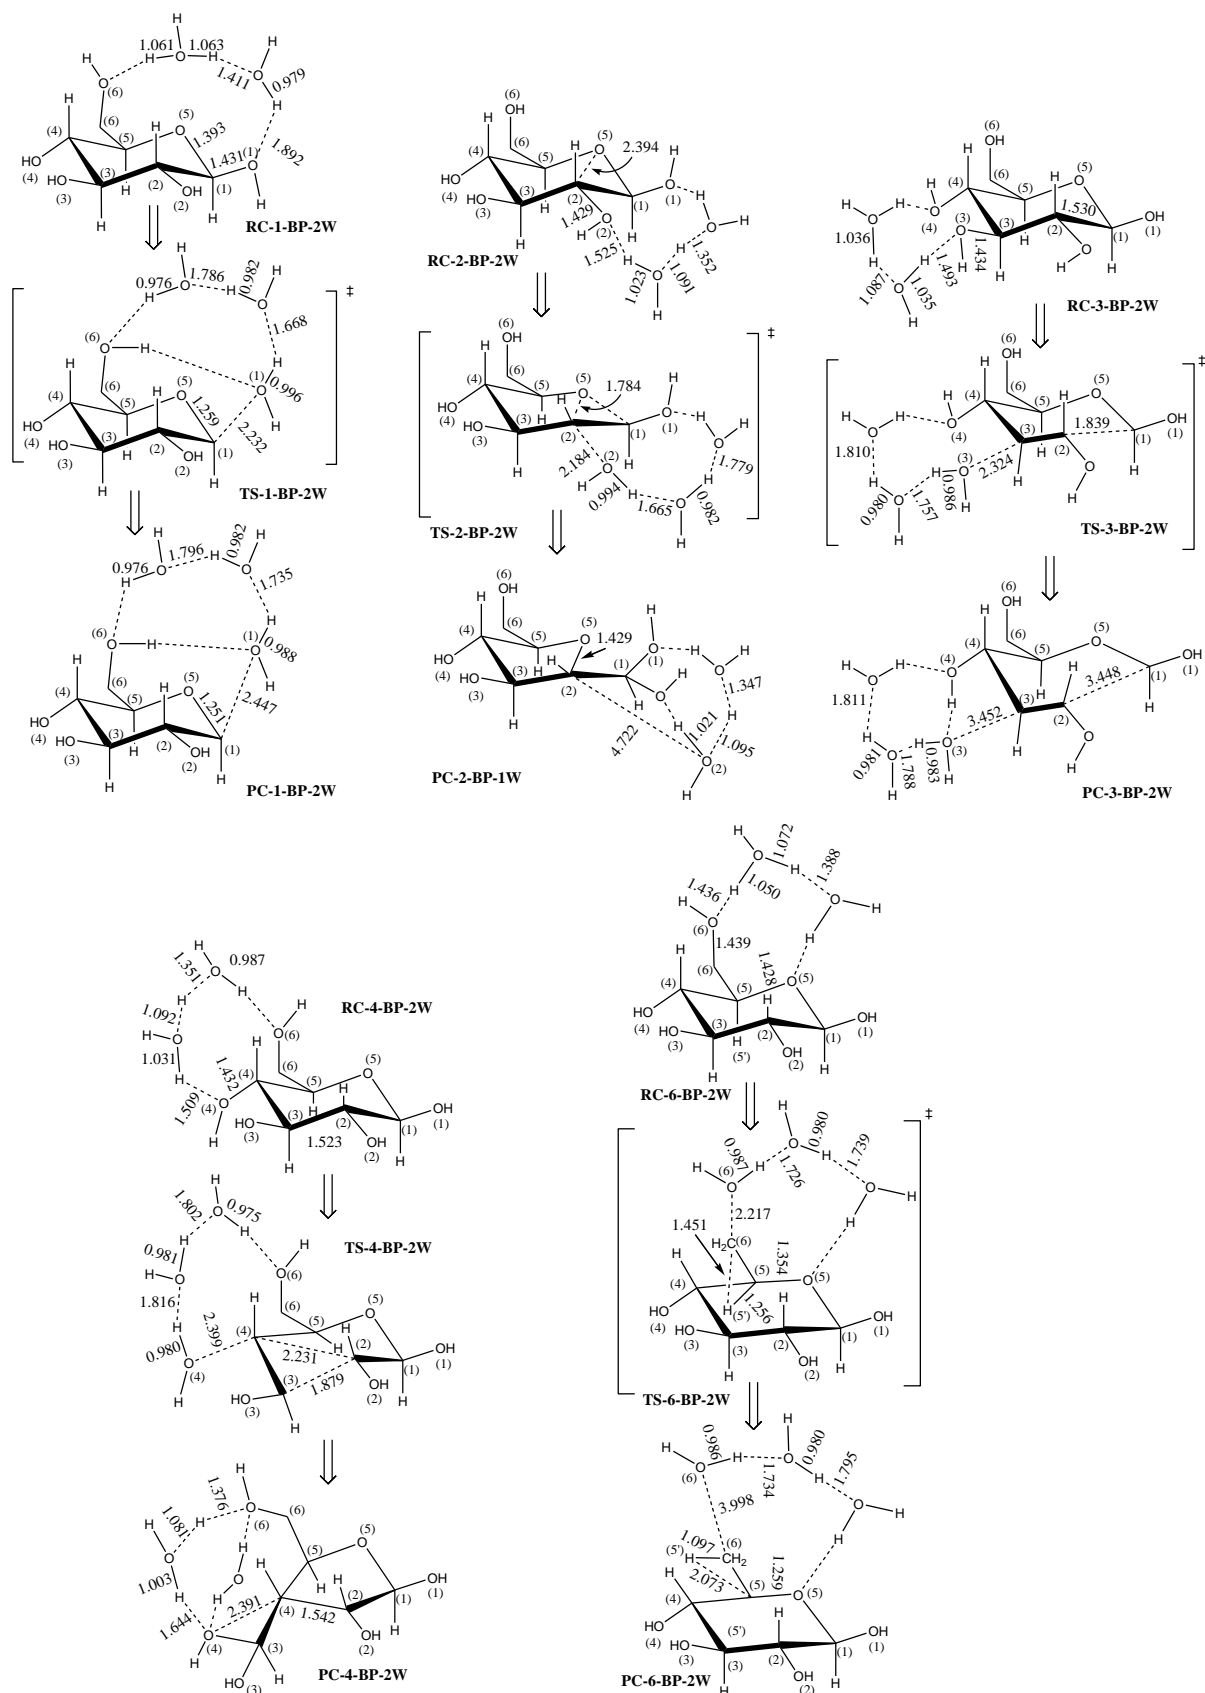

**Figure 6S.** Simple scheme for the optimized geometries for the species involved in the two isomerization reaction pathways of protonated  $\beta$ -glucopyranose, with 2 water molecules incorporated into the reaction systems. Key distances are indicated in Å. See Scheme 2a for the  $n = 5-1$  and  $5-2$  cases, and text for the notation of **RC-n-BP-kW**, **TS-n-BP-kW**, **PC-n-BP-kW** as well.

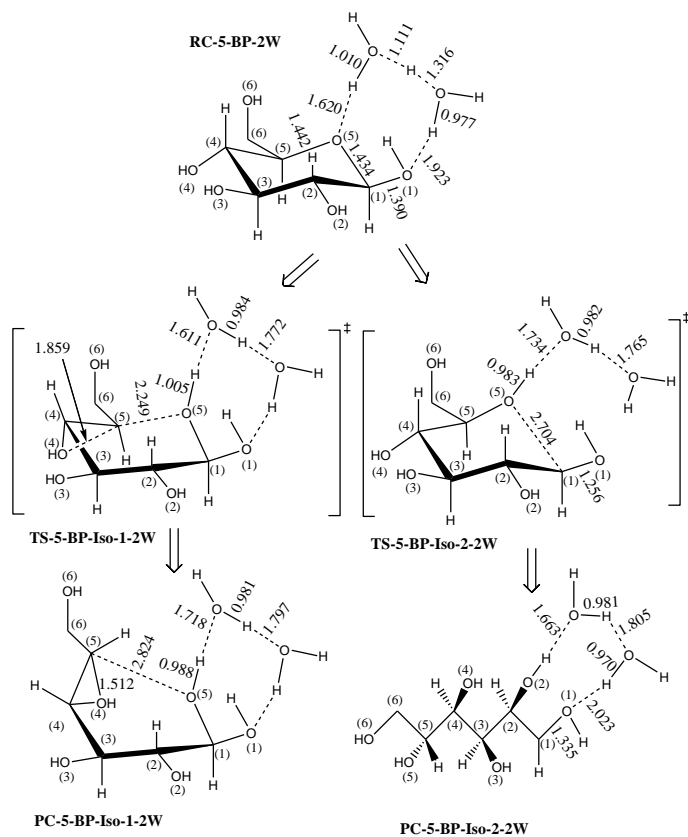



**Figure 7S.** Relative free energy (298K) profiles for the dehydration and isomerization reactions of protonated  $\beta$ -glucopyranose. (a) One water molecule and (b) two water molecules were incorporated into the reaction systems. The suffixes “-BP-1W” for (a) and “-BP-2W” for (b) in the notations of all species here are omitted for clarity. See Scheme 2a and Figures 3S~6S for the structural details.

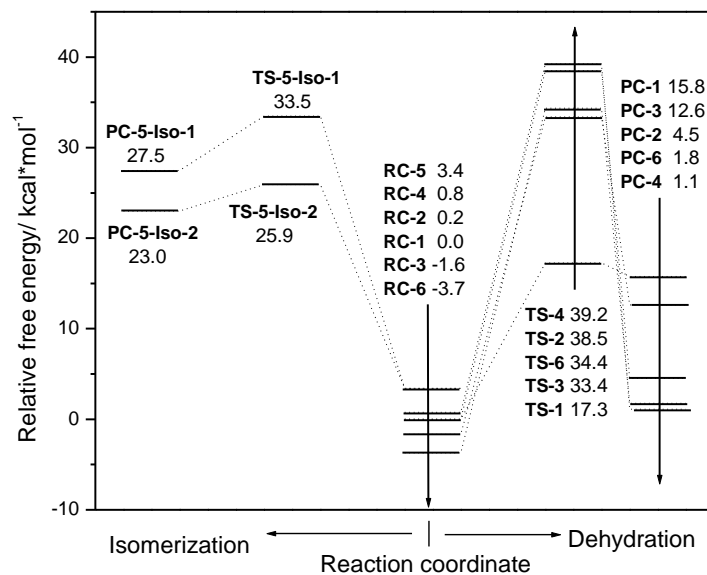

(a) 1 water molecule incorporated

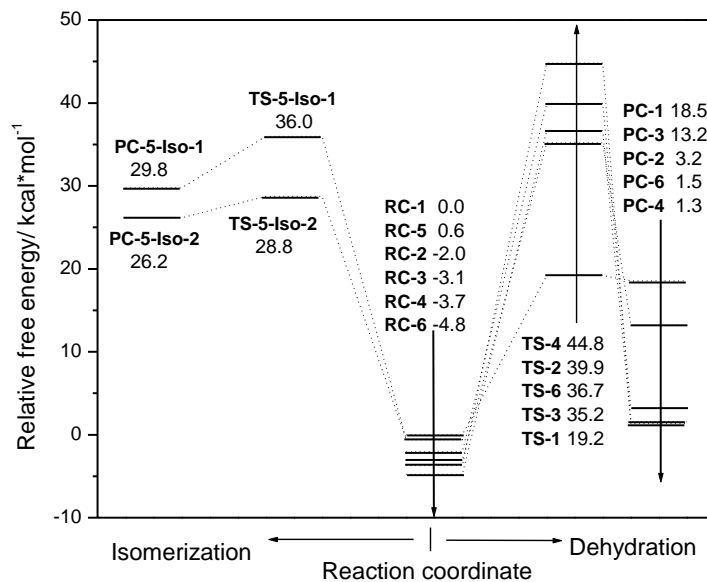

(b) 2 water molecules incorporated

**Figure 8S:** Optimized geometries for the species involved in the dehydration of BP at C(2) site catalyzed by the acid site on the 12T model. Key distances are indicated in (Å).

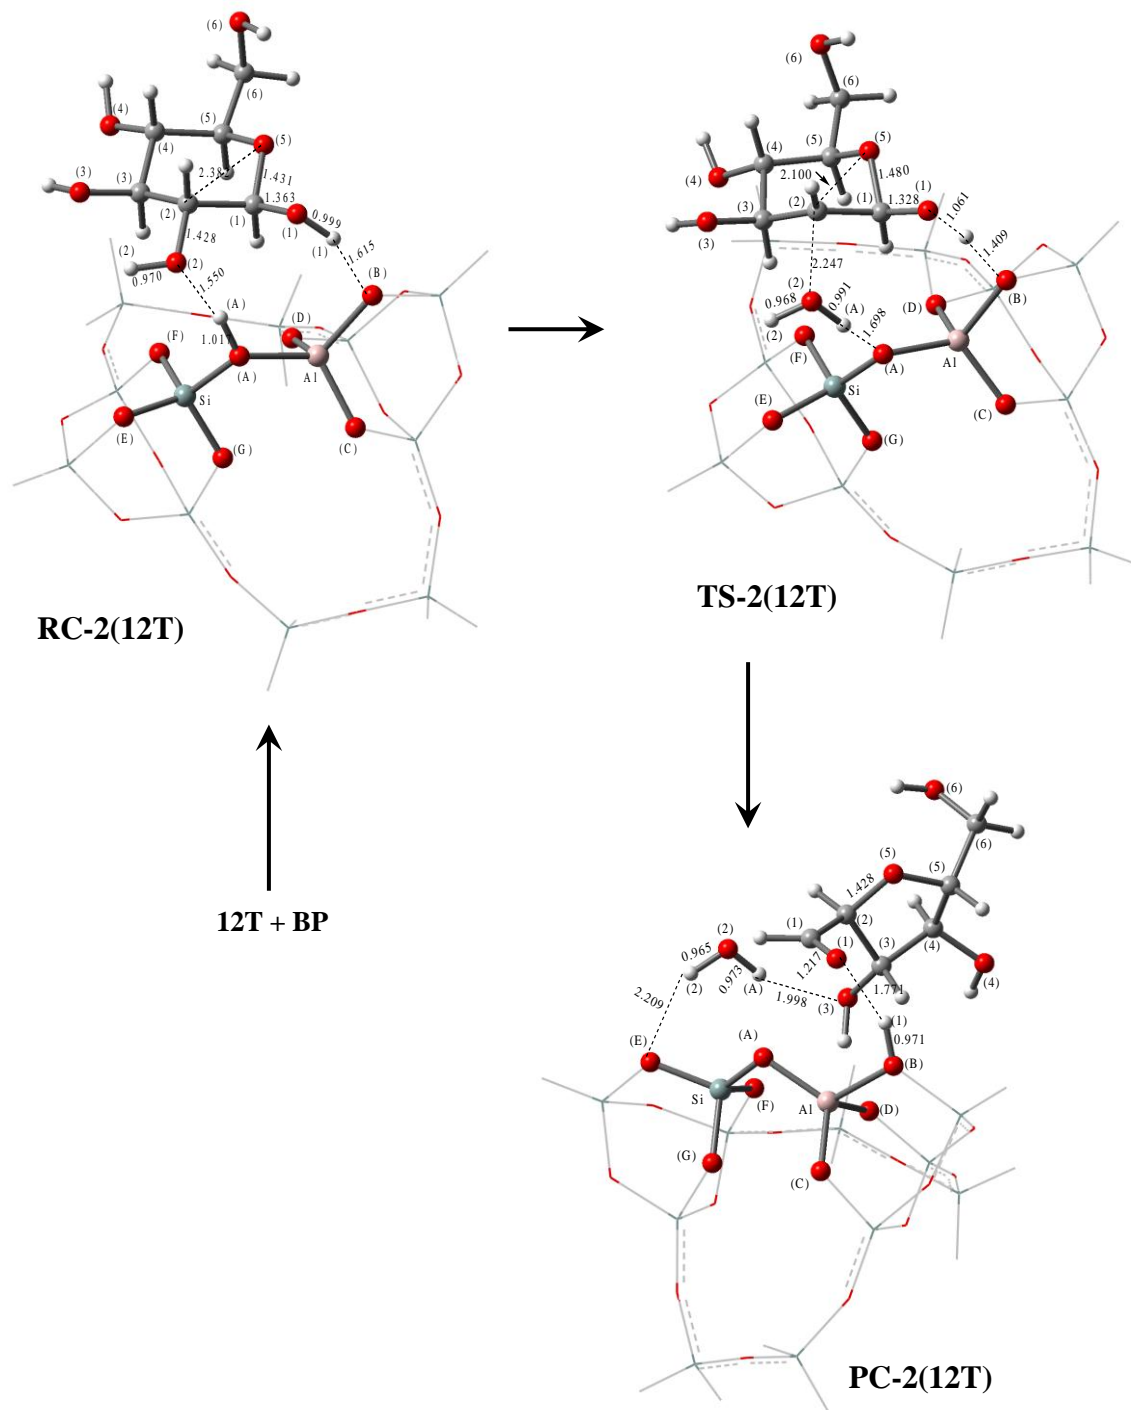

**Figure 9S:** Optimized geometries for the species involved in the dehydration of BP at C(3) site catalyzed by the acid site on the 12T model. Key distances are indicated in (Å)

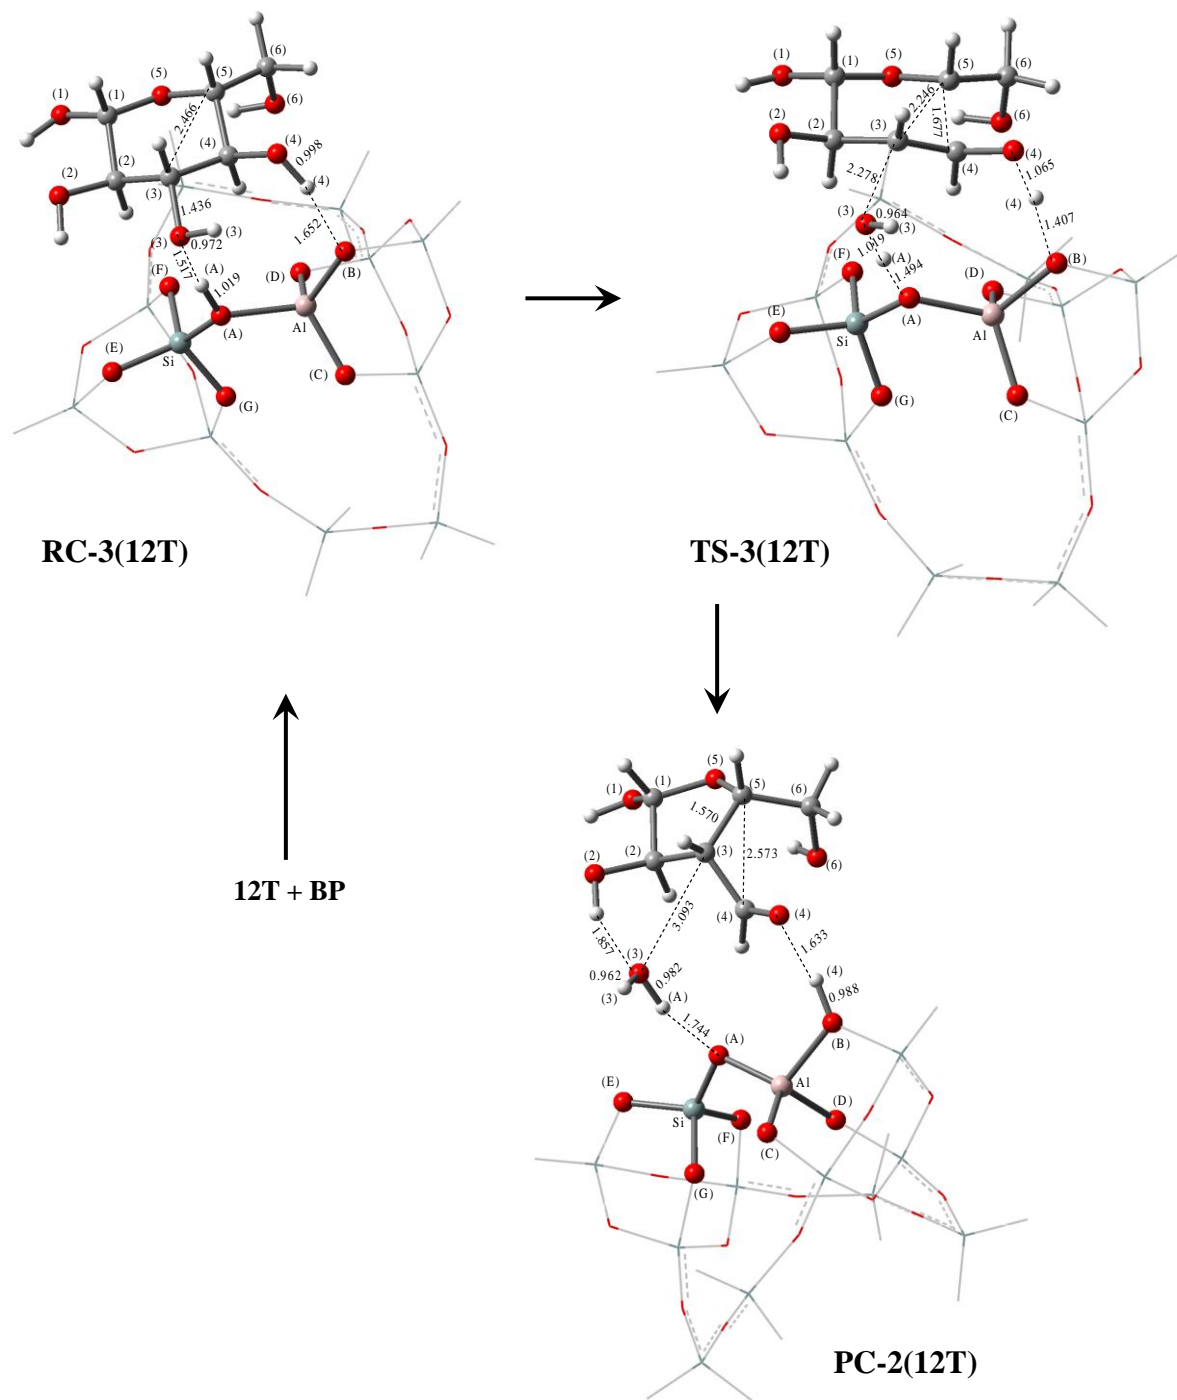

**Figure 10S:** Optimized geometries for the species involved in the dehydration of BP at C(4) site catalyzed by the acid site on the 12T model. Key distances are indicated in (Å).

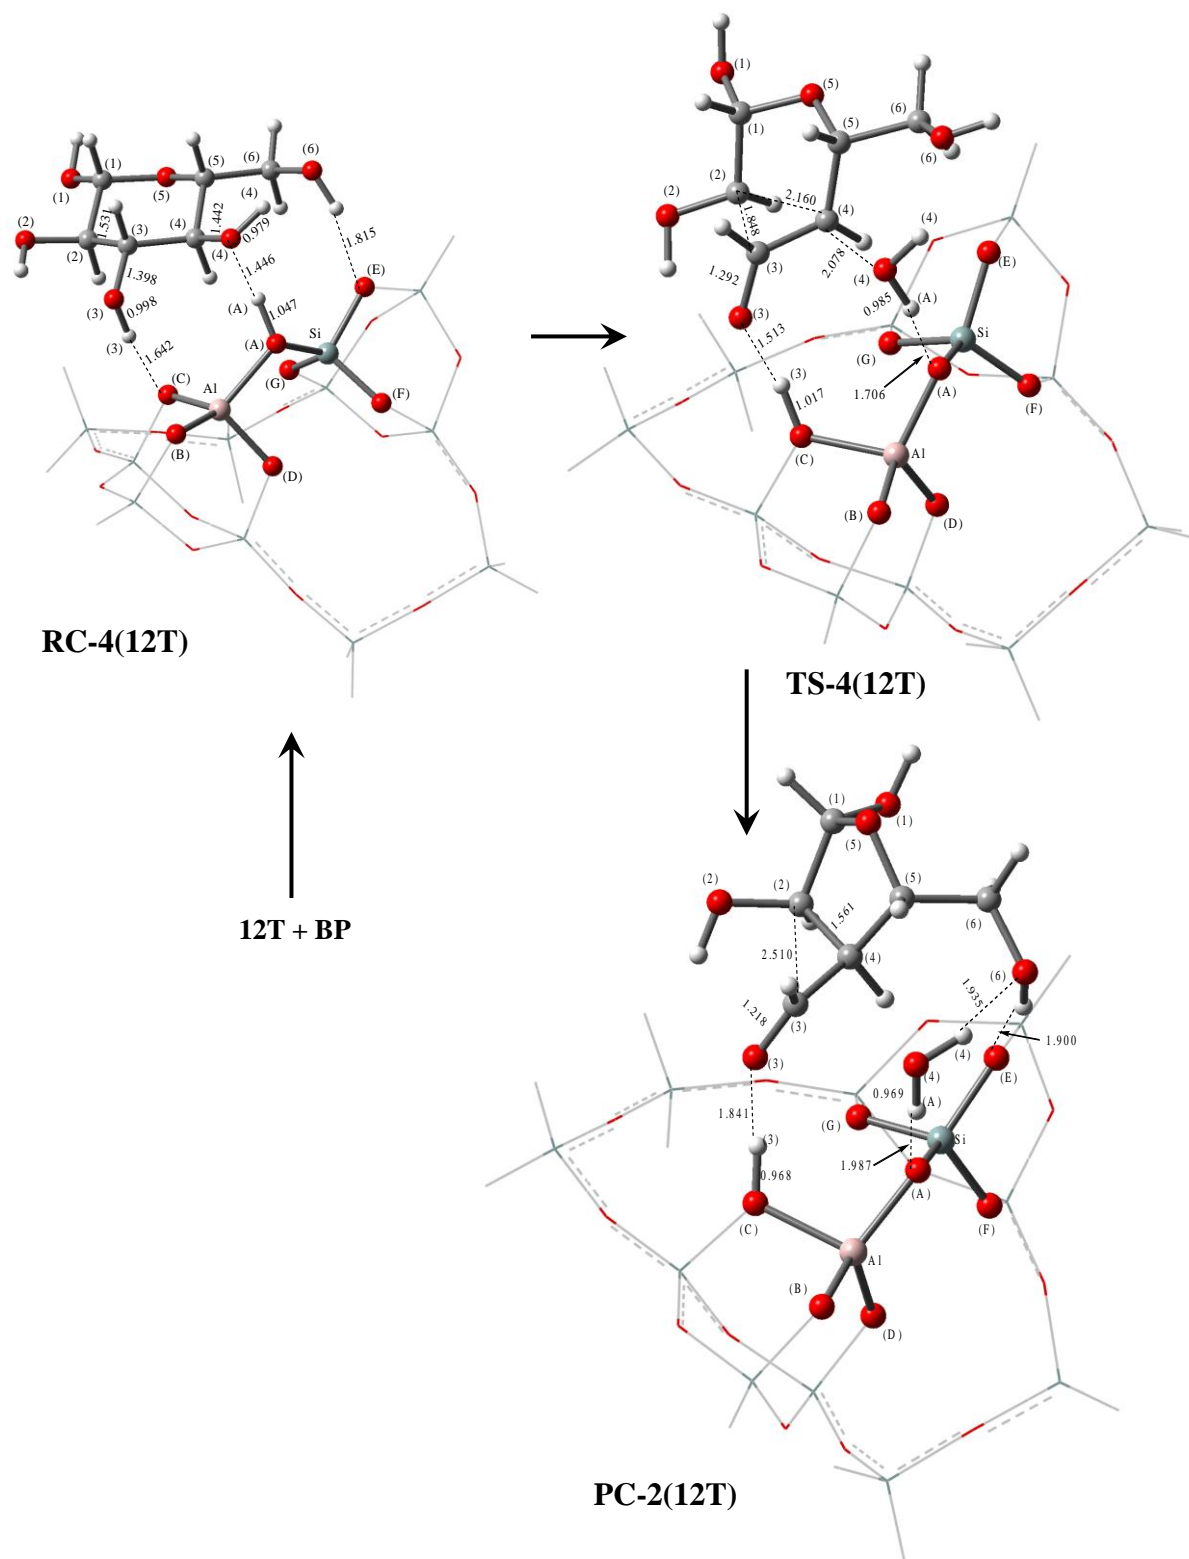

**Figure 11S:** Optimized geometries for the species involved in the dehydration of BP at C(6) site catalyzed by the acid site on the 12T model. Key distances are indicated in (Å).

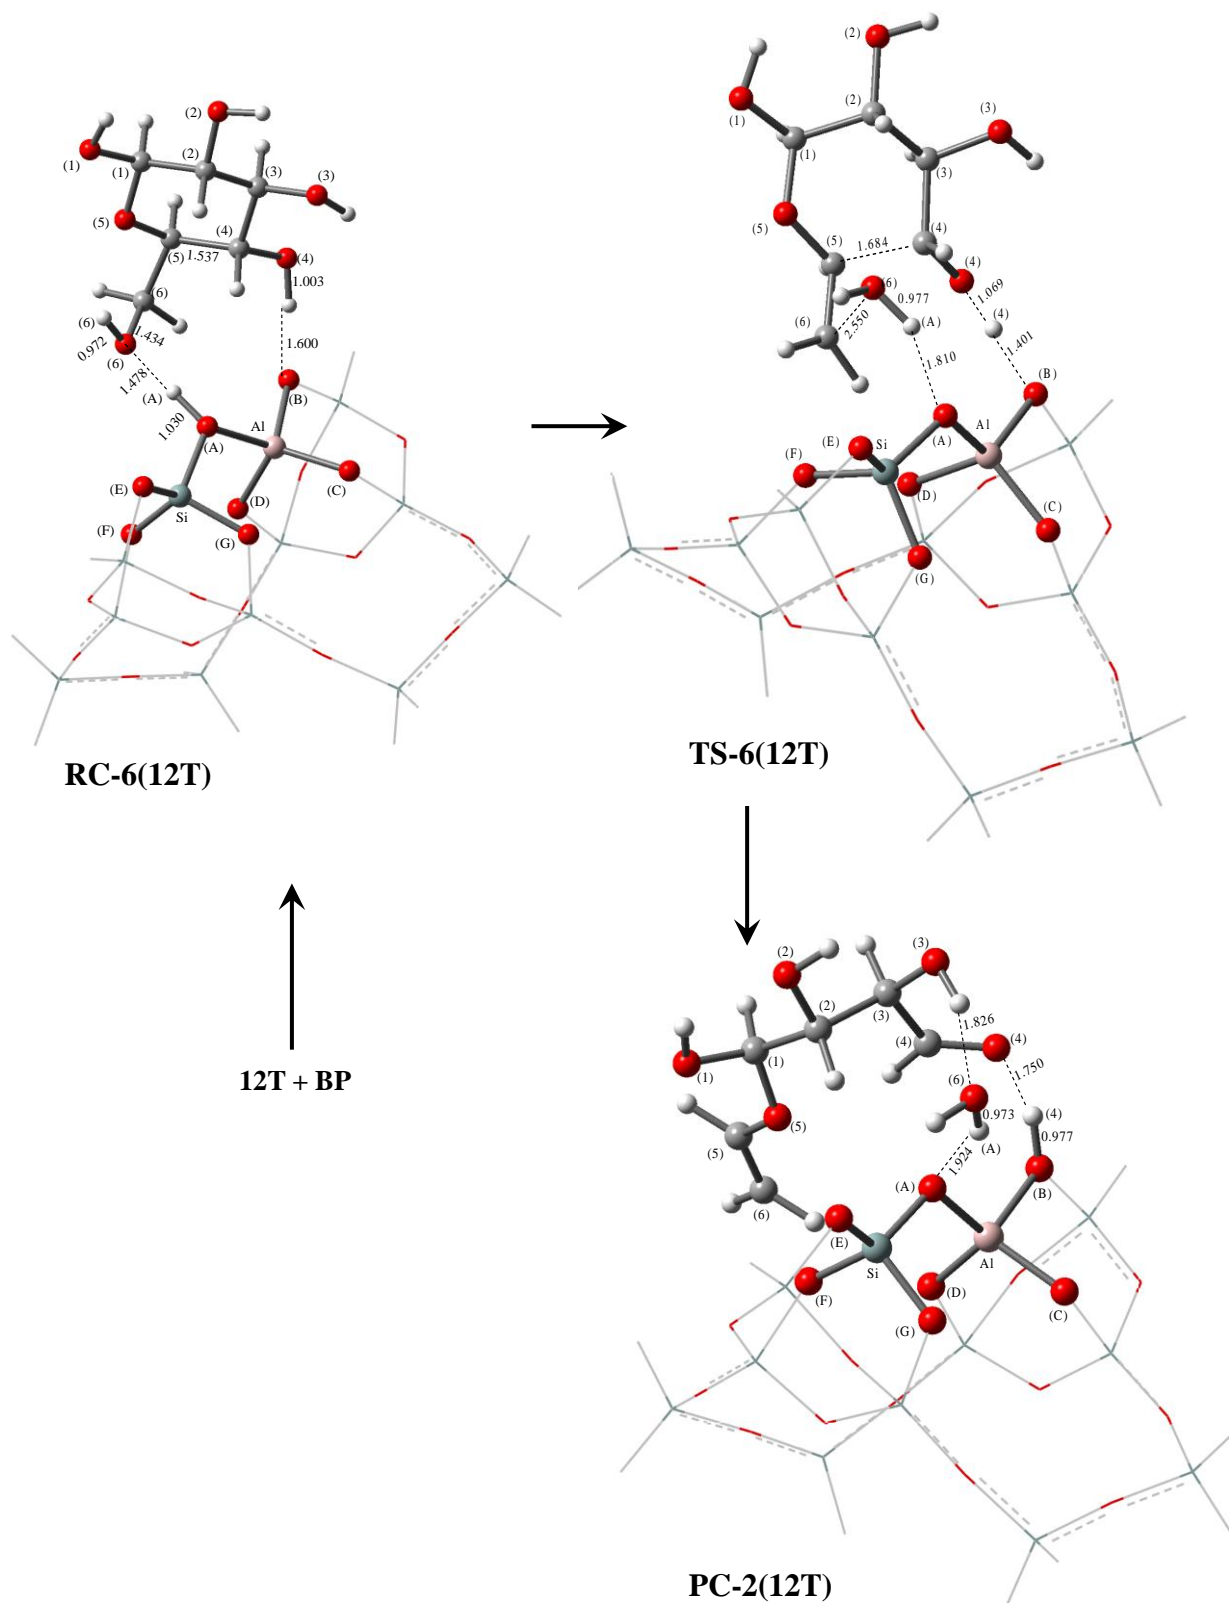

**Figure 12S.** Relative free energy (298 K) profiles for the first dehydration of BP catalyzed by the acid site on the 12T model. See Figure 13 in the text, and Figures S8-S11 as well for the structural information.

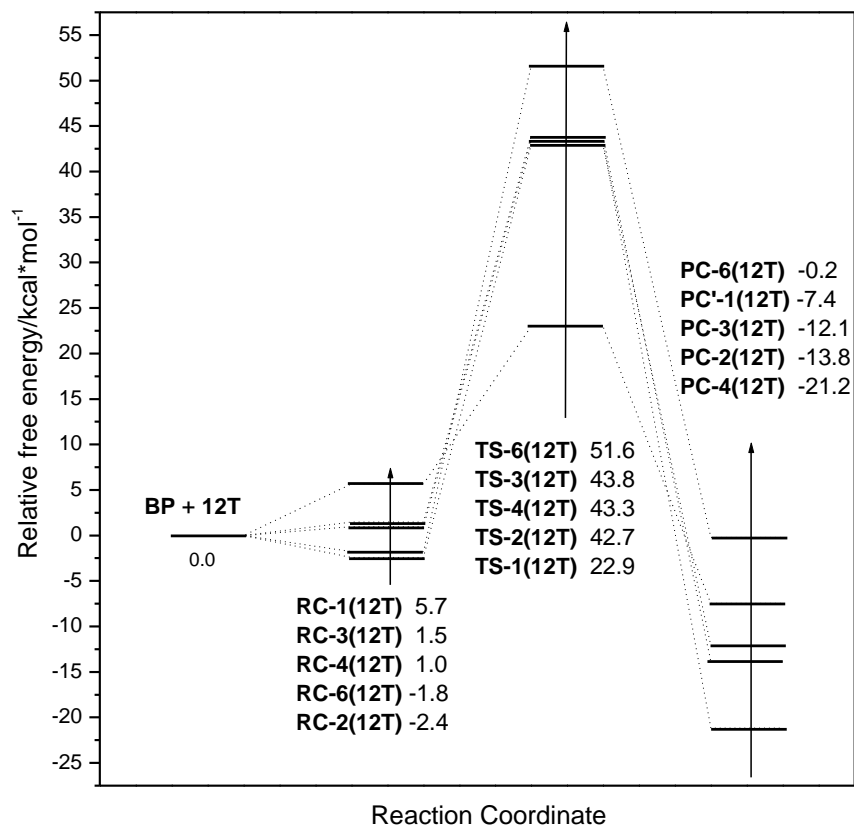

### Full citation of Reference 50:

[50] M. J. Frisch, G. W. Trucks, H. B. Schlegel, G. E. Scuseria, M. A. Robb, J. R. Cheeseman, G. Scalmani, V. Barone, B. Mennucci, G. A. Petersson, H. Nakatsuji, M. Caricato, X. Li, H. P. Hratchian, A. F. Izmaylov, J. Bloino, G. Zheng, J. L. Sonnenberg, M. Hada, M. Ehara, K. Toyota, R. Fukuda, J. Hasegawa, M. Ishida, T. Nakajima, Y. Honda, O. Kitao, H. Nakai, T. Vreven, J. A. Montgomery, Jr., J. E. Peralta, F. Ogliaro, M. Bearpark, J. J. Heyd, E. Brothers, K. N. Kudin, V. N. Staroverov, T. Keith, R. Kobayashi, J. Normand, K. Raghavachari, A. Rendell, J. C. Burant, S. S. Iyengar, J. Tomasi, M. Cossi, N. Rega, J. M. Millam, M. Klene, J. E. Knox, J. B. Cross, V. Bakken, C. Adamo, J. Jaramillo, R. Gomperts, R. E. Stratmann, O. Yazyev, A. J. Austin, R. Cammi, C. Pomelli, J. W. Ochterski, R. L. Martin, K. Morokuma, V. G. Zakrzewski, G. A. Voth, P. Salvador, J. J. Dannenberg, S. Dapprich, A. D. Daniels, O. Farkas, J. B. Foresman, J. V. Ortiz, J. Cioslowski, D. J. Fox, Gaussian 09, Revision C.01, Gaussian, Inc., Wallingford, CT, 2010.

Cartesian coordinates, ZPE corrected energy, enthalpy (298 K), free energy (298 K) for all the optimized structures reported in the manuscript. See the computational method and the notations of the species in the manuscript as well.

**Note:** In order to clarified the computational method for a certain species, in this paper, if a species notation does not contain a bracket, then this species is calculated with the PCM model in aqueous solution. If there is “(12T)” immediately followed a species notation, it is species is calculated with the gas-phase model for heterogeneous reaction on surface.

### In Figure 1.

#### **RC-1-BP (RC-n-BP, n = 1)**

```
-----  
C      -1.179344  -1.096883  -0.312516  
C      -1.632094  0.255261  0.200146  
C      -0.573102  1.273736  -0.227401  
C      0.799368  0.805058  0.260145  
C      1.091124  -0.617429  -0.231971  
O      0.033356  -1.482326  0.215111  
H      -1.685168  0.209334  1.296946  
O      -0.878479  2.573160  0.231800  
H      -0.560883  1.338543  -1.322263  
H      0.806118  0.799215  1.361712  
O      1.831460  1.638535  -0.234157  
H      1.137041  -0.630019  -1.330761  
C      2.382822  -1.194290  0.337403  
H      -1.211060  -1.167380  -1.405528  
O      -2.905186  0.480115  -0.361543  
H      -3.366457  1.161028  0.147120  
H      -0.903544  2.576001  1.200503  
H      1.690837  2.536387  0.098989  
H      2.422113  -2.260298  0.102252  
O      3.522409  -0.593646  -0.249945  
H      2.383820  -1.073770  1.428683  
H      3.446999  0.366116  -0.133975  
O      -2.144324  -2.082485  0.210656  
H      -2.104214  -2.948566  -0.249406  
H      -3.062131  -1.726149  0.155520  
-----
```

E + ZPE = -687.173151 a.u.  
H(298K) = -687.159527 a.u.  
G(298K) = -687.211146 a.u.

#### **TS-1-BP (TS-n-BP, n = 1)**

```
-----  
C      1.519941  -0.627254  -0.111818  
C      0.416063  -1.432626  0.567482  
O      -0.581751  -0.899130  1.152513  
-----
```

```
C      -1.059828  0.464927  0.856097  
C      -0.175835  1.163325  -0.175493  
C      1.288940  0.858437  0.100897  
C      -2.515933  0.325839  0.446850  
O      -2.677541  -0.232642  -0.841112  
O      -0.353230  2.559761  -0.052454  
O      2.134098  1.549378  -0.787880  
O      2.735799  -0.997628  0.489995  
O      -0.523926  -2.264733  -1.010397  
H      1.946742  2.495081  -0.694813  
H      1.526192  1.115385  1.144372  
H      1.521237  -0.831395  -1.186638  
H      -0.062686  -2.273541  -1.865125  
H      0.678450  -2.415140  0.952379  
H      3.106844  -1.767546  0.036569  
H      -0.987324  0.984017  1.814999  
H      -1.031439  2.857142  -0.672869  
H      -0.430050  0.828131  -1.188969  
H      -2.948360  1.329381  0.419443  
H      -3.042126  -0.257545  1.210829  
H      -2.259238  -1.107319  -0.873880  
H      -0.725922  -3.192584  -0.805713  
-----
```

E + ZPE = -687.167405 a.u.  
H(298K) = -687.153466 a.u.  
G(298K) = -687.205626 a.u.

#### **PC-1-BP (PC-n-BP, n = 1)**

```
-----  
C      -1.704166  -0.510186  0.026782  
C      -0.558399  -1.524383  -0.079041  
O      0.513945  -1.211629  -0.823604  
C      1.007241  0.157141  -0.856700  
C      0.288707  1.038230  0.167176  
C      -1.210812  0.933361  -0.067832  
C      2.511762  0.094834  -0.668072  
O      2.865977  -0.370498  0.624537  
O      0.639018  2.393477  -0.046994  
O      -1.938205  1.708015  0.863753  
O      -2.598312  -0.745300  -1.039844  
O      -0.029734  -1.675509  1.388723  
H      -1.636127  2.624272  0.779911  
-----
```



|   |           |           |           |
|---|-----------|-----------|-----------|
| H | -1.407784 | 1.283551  | -1.091708 |
| H | -2.202208 | -0.647690 | 0.992949  |
| H | -0.675686 | -2.089166 | 1.997898  |
| H | -0.901055 | -2.524802 | -0.338831 |
| H | -3.152647 | -1.511928 | -0.834612 |
| H | 0.791451  | 0.543974  | -1.859363 |
| H | 1.365450  | 2.638152  | 0.540662  |
| H | 0.538856  | 0.736453  | 1.190408  |
| H | 2.914249  | 1.104851  | -0.785853 |
| H | 2.944894  | -0.539316 | -1.447515 |
| H | 3.005554  | -1.324780 | 0.588544  |
| H | 0.787551  | -2.215998 | 1.401064  |

-----  
E + ZPE = -687.171202 a.u.  
H(298K) = -687.158161 a.u.  
G(298K) = -687.208438 a.u.

### RC-2-BP (RC-n-BP, n = 2)

|   |           |           |           |
|---|-----------|-----------|-----------|
| C | -1.156458 | -1.260508 | -0.286498 |
| C | -1.583501 | 0.101414  | 0.236381  |
| C | -0.627536 | 1.191316  | -0.210292 |
| C | 0.771007  | 0.818742  | 0.279620  |
| C | 1.121879  | -0.590624 | -0.217216 |
| O | 0.130977  | -1.507111 | 0.246465  |
| H | -1.713177 | 0.073214  | 1.321818  |
| O | -1.081787 | 2.455840  | 0.220766  |
| H | -0.616061 | 1.237075  | -1.305930 |
| H | 0.784124  | 0.817242  | 1.380017  |
| O | 1.741413  | 1.714043  | -0.227035 |
| H | 1.152390  | -0.591460 | -1.317857 |
| C | 2.461152  | -1.084317 | 0.321263  |
| H | -1.114315 | -1.264024 | -1.384864 |
| O | -2.044873 | -2.198214 | 0.203360  |
| O | -2.896937 | 0.441189  | -0.352194 |
| H | -1.996849 | -3.006080 | -0.327582 |
| H | -3.634558 | -0.095054 | 0.010122  |
| H | -1.011753 | 2.519955  | 1.186029  |
| H | 1.651880  | 2.567540  | 0.219722  |
| H | 2.557561  | -2.147564 | 0.089671  |
| O | 3.553456  | -0.422633 | -0.292719 |
| H | 2.482711  | -0.960568 | 1.412363  |
| H | 3.416064  | 0.531772  | -0.191505 |
| H | -3.095258 | 1.396917  | -0.220696 |

-----  
E + ZPE = -687.179695 a.u.  
H(298K) = -687.166322 a.u.  
G(298K) = -687.217323 a.u.

### TS-2-BP (TS-n-BP, n = 2)

|   |           |           |           |
|---|-----------|-----------|-----------|
| C | -1.167212 | -1.347750 | -0.426341 |
| C | -1.315403 | -0.119783 | 0.344912  |
| C | -0.623761 | 1.135633  | -0.135933 |
| C | 0.881657  | 0.929420  | 0.147692  |
| C | 1.181442  | -0.526913 | -0.195770 |
| O | 0.078895  | -1.258976 | 0.393925  |
| H | -1.711983 | -0.180174 | 1.354212  |
| O | -1.149197 | 2.298429  | 0.445979  |

|   |           |           |           |
|---|-----------|-----------|-----------|
| H | -0.765618 | 1.234671  | -1.216750 |
| H | 1.050575  | 1.080722  | 1.223877  |
| O | 1.703558  | 1.773698  | -0.613265 |
| H | 1.192500  | -0.678495 | -1.281224 |
| C | 2.465567  | -1.063452 | 0.426213  |
| H | -0.941021 | -1.272639 | -1.488345 |
| O | -1.882516 | -2.451306 | -0.156924 |
| O | -3.237566 | 0.594661  | -0.316674 |
| H | -2.242104 | -2.437883 | 0.744238  |
| H | -3.957685 | 0.137829  | 0.142083  |
| H | -0.951712 | 2.318387  | 1.394819  |
| H | 1.708340  | 2.657425  | -0.219619 |
| H | 2.545372  | -2.133241 | 0.224767  |
| O | 3.591631  | -0.443099 | -0.165544 |
| H | 2.439668  | -0.905945 | 1.511544  |
| H | 3.522618  | 0.516310  | -0.050854 |
| H | -3.261113 | 1.512844  | -0.003362 |

-----  
E + ZPE = -687.135749 a.u.  
H(298K) = -687.121075 a.u.  
G(298K) = -687.175056 a.u.

### PC-2-BP (PC-n-BP, n = 2)

|   |           |           |           |
|---|-----------|-----------|-----------|
| C | -2.226977 | -0.611070 | -0.369773 |
| C | -0.818072 | -0.370820 | 0.143522  |
| C | -0.336877 | 1.035492  | -0.194913 |
| C | 1.162015  | 0.890633  | 0.022672  |
| C | 1.400806  | -0.551987 | -0.475784 |
| O | 0.111097  | -1.207364 | -0.504872 |
| H | -0.803698 | -0.521018 | 1.236855  |
| O | -1.049132 | 2.021951  | 0.553282  |
| H | -0.531622 | 1.258542  | -1.248829 |
| H | 1.380029  | 0.971820  | 1.097944  |
| O | 1.958650  | 1.784809  | -0.717792 |
| H | 1.784886  | -0.512744 | -1.500630 |
| C | 2.338302  | -1.366923 | 0.405855  |
| H | -2.316907 | -0.464164 | -1.446240 |
| O | -2.813016 | -1.786310 | -0.035819 |
| O | -2.988167 | 0.516737  | 0.286318  |
| H | -2.625919 | -2.024553 | 0.886773  |
| H | -3.785124 | 0.774641  | -0.214074 |
| H | -0.733600 | 2.054121  | 1.472753  |
| H | 1.961371  | 2.644791  | -0.276232 |
| H | 2.424381  | -2.376531 | -0.002232 |
| O | 3.643251  | -0.810837 | 0.412431  |
| H | 1.924779  | -1.431441 | 1.420296  |
| H | 3.654587  | -0.018749 | 0.966349  |
| H | -2.349827 | 1.341445  | 0.469405  |

-----  
E + ZPE = -687.176522 a.u.  
H(298K) = -687.163463 a.u.  
G(298K) = -687.214232 a.u.

### RC-3-BP (RC-n-BP, n = 3)

|   |           |           |           |
|---|-----------|-----------|-----------|
| C | -0.993996 | -1.345619 | -0.375772 |
| C | -1.566854 | -0.080795 | 0.284613  |

|   |           |           |           |
|---|-----------|-----------|-----------|
| C | -0.767052 | 1.094199  | -0.218689 |
| C | 0.711729  | 0.947821  | 0.044196  |
| C | 1.162852  | -0.369740 | -0.609683 |
| O | 0.387357  | -1.439846 | -0.074216 |
| H | -1.451285 | -0.168716 | 1.373676  |
| O | -1.226274 | 2.294636  | 0.524431  |
| H | -0.967736 | 1.291559  | -1.276304 |
| H | 0.889932  | 0.894433  | 1.124072  |
| O | 1.334673  | 2.081385  | -0.523916 |
| H | 1.009005  | -0.301125 | -1.697215 |
| C | 2.624843  | -0.667414 | -0.358764 |
| H | -1.145590 | -1.302254 | -1.462564 |
| O | -1.628073 | -2.492673 | 0.070262  |
| O | -2.908050 | 0.158661  | -0.075010 |
| H | -1.538969 | -2.561276 | 1.033822  |
| H | -3.487254 | -0.421870 | 0.438093  |
| H | -2.190653 | 2.444260  | 0.412184  |
| H | 2.135718  | 2.295076  | -0.026820 |
| H | 3.229188  | 0.085384  | -0.878504 |
| O | 2.863685  | -0.636868 | 1.040762  |
| H | 2.853823  | -1.653151 | -0.778302 |
| H | 3.780793  | -0.891319 | 1.202849  |
| H | -0.732647 | 3.095923  | 0.241110  |

-----  
E + ZPE = -687.182442 a.u.  
H(298K) = -687.168634 a.u.  
G(298K) = -687.220605 a.u.

### TS-3-BP (TS-n-BP, n = 3)

|   |           |           |           |
|---|-----------|-----------|-----------|
| C | 1.181236  | -1.385900 | 0.386387  |
| C | 1.721202  | 0.223272  | -0.323052 |
| C | 0.683599  | 0.906374  | 0.303286  |
| C | -0.716831 | 0.688936  | -0.101680 |
| C | -1.068270 | -0.793972 | 0.308391  |
| O | -0.042998 | -1.657159 | -0.133977 |
| H | 1.627422  | -0.017981 | -1.382678 |
| O | 0.606509  | 3.136232  | -0.480674 |
| H | 0.866442  | 1.355581  | 1.278158  |
| H | -0.827278 | 0.768853  | -1.190548 |
| O | -1.534332 | 1.603092  | 0.581947  |
| H | -1.163657 | -0.828728 | 1.400096  |
| C | -2.345160 | -1.260372 | -0.375540 |
| H | 1.232693  | -1.272579 | 1.469360  |
| O | 2.134424  | -2.233096 | -0.035888 |
| O | 2.982981  | 0.471038  | 0.139796  |
| H | 2.018928  | -2.449283 | -0.977645 |
| H | 3.618339  | -0.080213 | -0.339615 |
| H | 1.246563  | 3.685212  | -0.007635 |
| H | -2.456291 | 1.354542  | 0.396748  |
| H | -2.591033 | -2.268370 | -0.026431 |
| O | -3.363090 | -0.333144 | -0.029177 |
| H | -2.179074 | -1.279821 | -1.458296 |
| H | -4.137965 | -0.487552 | -0.584986 |
| H | -0.257693 | 3.354611  | -0.099494 |

-----  
E + ZPE = -687.142575 a.u.  
H(298K) = -687.127803 a.u.  
G(298K) = -687.181842 a.u.

### PC-3-BP (PC-n-BP, n = 3)

|   |           |           |           |
|---|-----------|-----------|-----------|
| C | -1.948472 | 1.381439  | -0.485854 |
| C | 1.255078  | 1.713524  | 0.532679  |
| C | 1.029957  | 0.717787  | -0.330209 |
| C | 0.390508  | -0.557898 | 0.107719  |
| C | -0.965956 | -0.771227 | -0.592280 |
| O | -1.879926 | 0.219325  | 0.008516  |
| H | 0.998618  | 1.635684  | 1.587608  |
| O | 3.978483  | -0.882485 | -0.105301 |
| H | 1.296559  | 0.822888  | -1.380779 |
| H | 0.212268  | -0.539164 | 1.188527  |
| O | 1.233329  | -1.654978 | -0.233692 |
| H | -0.906184 | -0.567926 | -1.664892 |
| C | -1.577013 | -2.132608 | -0.355782 |
| H | -1.446565 | 1.658530  | -1.411366 |
| O | -2.649255 | 2.280856  | 0.078388  |
| O | 1.813073  | 2.882188  | 0.139544  |
| H | -3.075277 | 1.977805  | 0.908055  |
| H | 1.911117  | 3.476827  | 0.894868  |
| H | 4.524665  | -1.666811 | -0.235773 |
| H | 0.962745  | -2.425039 | 0.290407  |
| H | -1.064463 | -2.842028 | -1.014419 |
| O | -1.390066 | -2.469386 | 1.008978  |
| H | -2.637353 | -2.107638 | -0.627175 |
| H | -1.783506 | -3.335922 | 1.175043  |
| H | 3.057656  | -1.197485 | -0.139217 |

-----  
E + ZPE = -687.173187 a.u.  
H(298K) = -687.156631 a.u.  
G(298K) = -687.216745 a.u.

### RC-4-BP (RC-n-BP, n = 4)

|   |           |           |           |
|---|-----------|-----------|-----------|
| C | -1.324908 | -1.176211 | -0.305266 |
| C | -1.680056 | 0.225337  | 0.202845  |
| C | -0.601626 | 1.231324  | -0.190834 |
| C | 0.745333  | 0.721963  | 0.278226  |
| C | 0.978899  | -0.697054 | -0.255301 |
| O | -0.044378 | -1.550310 | 0.204957  |
| H | -1.751804 | 0.187540  | 1.300523  |
| O | -0.822523 | 2.493026  | 0.404512  |
| H | -0.583931 | 1.322136  | -1.287214 |
| H | 0.794255  | 0.722739  | 1.373843  |
| O | 1.821520  | 1.524609  | -0.247878 |
| H | 0.992087  | -0.665812 | -1.356359 |
| C | 2.295380  | -1.273796 | 0.245007  |
| H | -1.299826 | -1.192157 | -1.402632 |
| O | -2.244184 | -2.131725 | 0.091550  |
| O | -2.888783 | 0.679571  | -0.368708 |
| H | -2.368808 | -2.083946 | 1.052257  |
| H | -3.629924 | 0.205970  | 0.032745  |
| H | -1.634212 | 2.867468  | 0.034102  |
| H | 1.910607  | 2.351368  | 0.252344  |
| H | 2.509684  | -2.243013 | -0.200453 |
| O | 3.330455  | -0.339970 | -0.218679 |
| H | 2.324188  | -1.316609 | 1.334419  |
| H | 4.150617  | -0.395779 | 0.304685  |
| H | 2.892092  | 0.649124  | -0.212357 |

-----  
E + ZPE = -687.193146 a.u.  
H(298K) = -687.180181 a.u.

G(298K) = -687.230178 a.u.

### TS-4-BP (TS-n-BP, n = 4)

```
-----  
C      1.334755 -1.072398  0.487385  
C      1.771662  0.200150 -0.250008  
C      0.611107  1.198937 -0.320156  
C     -0.696926  0.656188 -0.435495  
C     -0.964212 -0.726291  0.053017  
O      0.151338 -1.561946 -0.140326  
H      2.038060 -0.058414 -1.283065  
O      0.862364  2.344463 -1.041381  
H      0.323504  1.453522  0.765834  
H     -1.504267  1.257031 -0.847779  
O     -2.150550  1.547429  1.453234  
H     -1.218444 -0.633575  1.123646  
C     -2.181306 -1.322193 -0.655815  
H      1.138224 -0.857371  1.545977  
O      2.297845 -2.058138  0.446242  
O      2.824465  0.859224  0.403816  
H      2.571812 -2.220146 -0.470073  
H      3.669267  0.525475  0.073142  
H      1.717121  2.701666 -0.752201  
H     -2.372504  2.485131  1.527504  
H     -2.292515 -2.354355 -0.311451  
O     -3.275505 -0.512714 -0.264918  
H     -2.037579 -1.311488 -1.740326  
H     -4.013294 -0.652443 -0.872706  
H     -2.949517  1.112066  1.114591  
-----
```

E + ZPE = -687.131098 a.u.  
H(298K) = -687.115950 a.u.  
G(298K) = -687.170811 a.u.

### PC-4-BP (PC-n-BP, n = 4)

```
-----  
C      1.397305 -0.936711  0.604197  
C      1.945826  0.213227 -0.302266  
C      0.819519  1.153709 -0.574057  
C     -0.479411  0.632982 -1.009035  
C     -0.837297 -0.550808 -0.067666  
O      0.241236 -1.465751 -0.002146  
H      2.243670 -0.231669 -1.261391  
O      0.983778  2.379142 -0.325376  
H     -1.241109  1.412601 -1.000180  
H     -0.355151  0.229484 -2.022677  
O     -3.232084  1.236198  1.599641  
H     -1.059833 -0.160117  0.933753  
C     -2.032624 -1.323019 -0.599141  
H      1.172498 -0.532380  1.598300  
O      2.331346 -1.931959  0.769853  
O      2.970970  0.917072  0.333872  
H      2.577120 -2.308792 -0.089465  
H      3.798514  0.830418 -0.158488  
H      1.905487  2.527880  0.011089  
H     -4.104371  1.317838  2.003263  
H     -2.270168 -2.129499  0.101817  
O     -3.109081 -0.402154 -0.708410  
H     -1.782880 -1.750567 -1.577026  
-----
```

H -3.898999 -0.871608 -1.007444  
H -3.354006 0.669730 0.816791  
-----

E + ZPE = -687.194108 a.u.  
H(298K) = -687.178757 a.u.  
G(298K) = -687.236134 a.u.

### RC-6-BP (RC-n-BP, n = 6)

```
-----  
C     -0.899935 -1.319433 -0.449728  
C     -1.552588 -0.149851  0.290588  
C     -0.910203  1.159151 -0.146297  
C      0.595667  1.102030  0.061795  
C      1.159101 -0.120969 -0.662713  
O      0.508649 -1.301282 -0.212819  
H     -1.398200 -0.285063  1.371876  
O     -1.389225  2.256893  0.607684  
H     -1.115126  1.315739 -1.216416  
H      0.796914  1.015616  1.139947  
O      1.237543  2.239365 -0.475204  
H      1.036925  0.009308 -1.747600  
C      2.627001 -0.355366 -0.393684  
H     -1.085080 -1.238917 -1.528514  
O     -1.385961 -2.551791 -0.049032  
O     -2.928953 -0.064576 -0.018031  
H     -1.331057 -2.628044  0.916395  
H     -3.405770 -0.765160  0.447209  
H     -2.316057  2.409264  0.377904  
H      0.840483  3.025362 -0.073013  
H      3.223596  0.550988 -0.463906  
O      2.704854 -0.774963  1.029802  
H      3.029875 -1.169417 -0.993287  
H      3.593450 -1.083250  1.298263  
H      2.040535 -1.478966  1.212186  
-----
```

E + ZPE = -687.186078 a.u.  
H(298K) = -687.172376 a.u.  
G(298K) = -687.223939 a.u.

### TS-6-BP (TS-n-BP, n = 6)

```
-----  
C     -1.048079 -1.333926 -0.376411  
C     -1.654714 -0.123838  0.333729  
C     -0.973451  1.151027 -0.145703  
C      0.525896  1.064065  0.100471  
C      1.066260 -0.244299 -0.451979  
O      0.382811 -1.371288 -0.132171  
H     -1.504172 -0.229607  1.418261  
O     -1.430697  2.285544  0.557585  
H     -1.150747  1.268934 -1.225418  
H      0.707920  1.029005  1.185290  
O      1.234593  2.115208 -0.501941  
H      1.200371 -0.115590 -1.675371  
C      2.400365 -0.380753 -0.834581  
H     -1.207576 -1.271101 -1.458562  
O     -1.561387 -2.538697  0.044210  
O     -3.024458 -0.007507  0.017323  
H     -1.537510 -2.595410  1.012598  
H     -3.529648 -0.652277  0.530801  
-----
```

|   |           |           |           |
|---|-----------|-----------|-----------|
| H | -2.352924 | 2.447928  | 0.314995  |
| H | 0.940365  | 2.947969  | -0.105669 |
| H | 2.970232  | 0.518174  | -1.038326 |
| O | 3.490458  | -0.627533 | 1.047534  |
| H | 2.751264  | -1.349339 | -1.173900 |
| H | 4.298775  | -0.094960 | 1.047799  |
| H | 3.785425  | -1.543187 | 1.154035  |

-----  
E + ZPE = -687.141884 a.u.  
H(298K) = -687.127081 a.u.  
G(298K) = -687.181457 a.u.

### PC-6-BP (PC-n-BP, n = 6)

|   |           |           |           |
|---|-----------|-----------|-----------|
| C | -1.237005 | -0.505739 | -0.873179 |
| C | -1.156039 | 0.747303  | -0.001596 |
| C | 0.190308  | 1.434839  | -0.170051 |
| C | 1.276249  | 0.478145  | 0.300733  |
| C | 1.175018  | -0.848817 | -0.393072 |
| O | 0.085456  | -1.268625 | -0.860521 |
| H | -1.294645 | 0.475128  | 1.051542  |
| O | 0.289567  | 2.578851  | 0.642930  |
| H | 0.354833  | 1.688467  | -1.226785 |
| H | 1.090691  | 0.232908  | 1.363353  |
| O | 2.574214  | 0.971122  | 0.118350  |
| H | 3.041706  | -1.211789 | -1.223766 |
| C | 2.356141  | -1.711561 | -0.527850 |
| H | -1.345882 | -0.250997 | -1.927987 |
| O | -2.182001 | -1.404522 | -0.515722 |
| O | -2.155853 | 1.643173  | -0.429676 |
| H | -2.047000 | -1.630468 | 0.431222  |
| H | -2.988590 | 1.437209  | 0.015757  |
| H | -0.298275 | 3.261660  | 0.289677  |
| H | 2.705606  | 1.704635  | 0.736275  |
| H | 2.872822  | -1.762812 | 0.434966  |
| O | -0.870013 | -1.828618 | 1.835425  |
| H | 2.079910  | -2.695396 | -0.900442 |
| H | -1.183324 | -1.606711 | 2.722502  |
| H | -0.546839 | -2.737892 | 1.897493  |

-----  
E + ZPE = -687.199020 a.u.  
H(298K) = -687.182774 a.u.  
G(298K) = -687.240526 a.u.

### In Figure 3.

#### RC-5-BP

#### (RC-n-BP, n = 5)

|   |           |           |           |
|---|-----------|-----------|-----------|
| O | 0.322700  | -1.388251 | -0.097872 |
| C | -1.175033 | -1.272007 | -0.393593 |
| C | -1.588475 | 0.013572  | 0.303180  |
| C | -0.764371 | 1.194528  | -0.195491 |
| C | 0.723952  | 0.975215  | 0.050010  |
| C | 1.201353  | -0.308479 | -0.631942 |
| O | -1.747999 | -2.404723 | 0.059477  |
| O | -2.954818 | 0.178834  | 0.009124  |

|   |           |           |           |
|---|-----------|-----------|-----------|
| O | -1.236202 | 2.321309  | 0.511593  |
| O | 1.410981  | 2.068596  | -0.519662 |
| C | 2.631028  | -0.686054 | -0.327874 |
| O | 2.809994  | -0.691269 | 1.074602  |
| H | -1.426714 | -0.107980 | 1.385432  |
| H | -0.934221 | 1.320832  | -1.275279 |
| H | 0.906239  | 0.907872  | 1.128154  |
| H | 1.040749  | -0.266027 | -1.713052 |
| H | -1.255661 | -1.229572 | -1.481201 |
| H | -1.895379 | -2.366410 | 1.019062  |
| H | -3.227139 | 1.042313  | 0.354764  |
| H | -0.849110 | 3.115914  | 0.118118  |
| H | 2.178793  | 2.290095  | 0.023566  |
| H | 3.266153  | 0.060253  | -0.819411 |
| H | 2.854010  | -1.665181 | -0.767057 |
| H | 3.704643  | -0.997573 | 1.270994  |
| H | 0.629667  | -2.281155 | -0.367941 |

-----  
E + ZPE = -687.179572 a.u.  
H(298K) = -687.165882 a.u.  
G(298K) = -687.217389 a.u.

#### TS-5-BP-Iso-1

#### (TS-n-BP-Iso-m, n = 5, m = 1)

|   |           |           |           |
|---|-----------|-----------|-----------|
| O | -0.140973 | -1.646888 | -0.117159 |
| C | -1.461725 | -1.171832 | -0.355186 |
| C | -1.575823 | 0.188022  | 0.324280  |
| C | -0.569582 | 1.216203  | -0.206818 |
| C | 0.855640  | 0.833350  | 0.121107  |
| C | 1.487941  | -0.195167 | -0.694415 |
| O | -2.398346 | -2.019421 | 0.230790  |
| O | -2.882450 | 0.655416  | 0.072939  |
| O | -0.889465 | 2.436273  | 0.433238  |
| O | 1.800287  | 1.673858  | -0.589394 |
| C | 2.662805  | -0.976228 | -0.264510 |
| O | 2.880651  | -0.815088 | 1.112229  |
| H | -1.411663 | 0.046925  | 1.403735  |
| H | -0.685836 | 1.309022  | -1.295136 |
| H | 1.063171  | 0.788844  | 1.189420  |
| H | 1.189728  | -0.265794 | -1.736636 |
| H | -1.634166 | -1.082043 | -1.434143 |
| H | -2.640428 | -2.718958 | -0.390803 |
| H | -2.924520 | 1.573181  | 0.380949  |
| H | -0.573656 | 3.176771  | -0.101789 |
| H | 2.567464  | 1.867738  | -0.022148 |
| H | 3.515114  | -0.647201 | -0.874493 |
| H | 2.456248  | -2.018292 | -0.548228 |
| H | 3.742792  | -1.188585 | 1.337990  |
| H | -0.017434 | -2.480896 | -0.596622 |

-----  
E + ZPE = -687.139905 a.u.  
H(298K) = -687.125721 a.u.  
G(298K) = -687.178722 a.u.

#### PC-5-BP-Iso-1

#### (PC-n-BP-Iso-m, n = 5, m = 1)

|   |           |           |           |
|---|-----------|-----------|-----------|
| O | 0.582898  | -1.789507 | -0.223020 |
| C | 1.682583  | -1.096363 | 0.279145  |
| C | 1.638299  | 0.307408  | -0.316049 |
| C | 0.473359  | 1.153671  | 0.211825  |
| C | -0.856911 | 0.561860  | -0.172873 |
| C | -1.643156 | -0.251926 | 0.740872  |
| O | 2.849190  | -1.768426 | -0.137780 |
| O | 2.852600  | 0.928603  | 0.046080  |
| O | 0.618801  | 2.426234  | -0.387875 |
| O | -1.985630 | 1.211141  | 0.599969  |
| C | -2.740616 | -1.143392 | 0.229650  |
| O | -3.298578 | -0.488988 | -0.896484 |
| H | 1.554319  | 0.216526  | -1.409212 |
| H | 0.548218  | 1.225630  | 1.304291  |
| H | -1.095372 | 0.523111  | -1.232878 |
| H | -1.252680 | -0.441926 | 1.735644  |
| H | 1.653618  | -1.043936 | 1.377033  |
| H | 3.618051  | -1.287907 | 0.203661  |
| H | 2.829932  | 1.841954  | -0.275085 |
| H | 0.193318  | 3.096555  | 0.163772  |
| H | -2.782194 | 1.273408  | 0.015853  |
| H | -3.483647 | -1.290675 | 1.016686  |
| H | -2.289190 | -2.106299 | -0.033827 |
| H | -4.224153 | -0.746081 | -0.996807 |
| H | 0.454184  | -2.600371 | 0.288339  |

-----  
E + ZPE = -687.150267 a.u.  
H(298K) = -687.135733 a.u.  
G(298K) = -687.190026 a.u.

### TS-5-BP-Iso-2

(TS-n-BP-Iso-m, n = 5, m = 2)

|   |           |           |           |
|---|-----------|-----------|-----------|
| C | -2.057520 | 1.318274  | -0.149452 |
| C | -2.062944 | -0.143925 | -0.344525 |
| C | -0.811121 | -0.727253 | 0.415828  |
| C | 0.516147  | -0.376833 | -0.305652 |
| C | 1.453133  | 0.344601  | 0.664200  |
| O | 0.738611  | 1.515345  | 1.039165  |
| H | -1.971854 | -0.386046 | -1.412442 |
| O | -1.032148 | -2.105381 | 0.539626  |
| H | -0.815344 | -0.312730 | 1.427683  |
| H | 0.315552  | 0.321086  | -1.132728 |
| O | 1.054582  | -1.573933 | -0.827447 |
| H | 1.642815  | -0.299381 | 1.534221  |
| C | 2.776008  | 0.742078  | 0.020594  |
| H | -2.529602 | 1.767464  | 0.727166  |
| O | -3.239935 | -0.637674 | 0.227117  |
| H | -3.072532 | -1.570264 | 0.444863  |
| H | -0.534757 | -2.556596 | -0.163163 |
| H | 2.018962  | -1.465172 | -0.916030 |
| H | 3.351118  | 1.354347  | 0.724669  |
| O | 3.479432  | -0.458294 | -0.296948 |
| H | 2.577139  | 1.329747  | -0.884346 |
| H | 4.256456  | -0.245184 | -0.829941 |
| O | -1.469414 | 2.044588  | -0.988006 |
| H | -1.452475 | 2.996390  | -0.752886 |
| H | 1.083279  | 1.847473  | 1.878919  |

E + ZPE = -687.156536 a.u.  
H(298K) = -687.142191 a.u.  
G(298K) = -687.196212 a.u.

### PC-5-BP-Iso-2

(PC-n-BP-Iso-m, n = 5, m = 2)

|   |           |           |           |
|---|-----------|-----------|-----------|
| C | -2.494154 | -1.068235 | 0.272257  |
| O | -3.807408 | -0.791808 | -0.196248 |
| C | -1.657924 | 0.139893  | -0.119259 |
| O | -2.183102 | 1.312651  | 0.475166  |
| C | -0.231924 | 0.052202  | 0.396944  |
| C | 0.665969  | 1.252970  | 0.063995  |
| C | 2.074061  | 0.645714  | 0.048440  |
| C | 1.928057  | -0.689531 | -0.671977 |
| O | 2.750104  | -1.637765 | -0.195446 |
| O | 0.451890  | -1.077037 | -0.238165 |
| O | 0.333532  | 1.927552  | -1.123418 |
| O | 2.447306  | 0.444894  | 1.387991  |
| H | -2.095234 | -1.979127 | -0.189760 |
| H | -2.485731 | -1.179306 | 1.363247  |
| H | -1.644862 | 0.232934  | -1.214079 |
| H | -0.199171 | -0.155556 | 1.468705  |
| H | 0.594533  | 1.986821  | 0.867395  |
| H | 2.775381  | 1.284284  | -0.498354 |
| H | 1.867035  | -0.635660 | -1.758004 |
| H | -4.431344 | -1.386540 | 0.238163  |
| H | 3.293792  | -0.024362 | 1.418243  |
| H | 0.464046  | 1.381084  | -1.910634 |
| H | 0.457835  | -1.899186 | 0.249269  |
| H | -3.144565 | 1.284911  | 0.354426  |
| H | 2.905194  | -2.336282 | -0.850060 |

-----  
E + ZPE = -687.173660 a.u.  
H(298K) = -687.159880 a.u.  
G(298K) = -687.211977 a.u.

### In Figure 4:

#### P1

|   |           |           |           |
|---|-----------|-----------|-----------|
| O | 0.224020  | -1.729418 | -0.129241 |
| C | -1.005882 | -1.692917 | 0.085654  |
| C | -1.812170 | -0.445396 | 0.286288  |
| C | -1.078278 | 0.782074  | -0.252828 |
| C | 0.371791  | 0.712137  | 0.223352  |
| C | 1.065163  | -0.529552 | -0.325608 |
| O | -3.064179 | -0.607493 | -0.317948 |
| O | -1.695733 | 1.982275  | 0.137546  |
| O | 1.130807  | 1.800551  | -0.254985 |
| C | 2.403031  | -0.848809 | 0.336379  |
| O | 3.388167  | 0.063289  | -0.100497 |
| H | -1.892744 | -0.361566 | 1.384782  |
| H | -1.106834 | 0.765390  | -1.347899 |
| H | 0.393075  | 0.682895  | 1.324030  |

|   |           |           |           |
|---|-----------|-----------|-----------|
| H | 1.180090  | -0.463497 | -1.411338 |
| H | -1.490790 | -2.669035 | 0.136722  |
| H | -3.727275 | -0.837046 | 0.347585  |
| H | -1.735748 | 2.041033  | 1.104679  |
| H | 0.748974  | 2.617643  | 0.098709  |
| H | 2.722725  | -1.845688 | 0.026477  |
| H | 2.286375  | -0.831654 | 1.426593  |
| H | 3.095561  | 0.962677  | 0.111228  |

-----  
E + ZPE = -610.772105 a.u.  
H(298K) = -610.759919 a.u.  
G(298K) = -610.808612 a.u.

### TS-P1-A

|   |           |           |           |
|---|-----------|-----------|-----------|
| O | 0.278977  | -1.721975 | 0.236176  |
| C | -1.031936 | -1.697124 | 0.136279  |
| C | -1.764451 | -0.523461 | -0.111241 |
| C | -1.056565 | 0.811928  | -0.269230 |
| C | 0.353782  | 0.711845  | 0.312361  |
| C | 1.021510  | -0.556032 | -0.218750 |
| O | -3.058031 | -0.612751 | -0.400950 |
| O | -1.843781 | 1.847756  | 0.254991  |
| O | 1.149629  | 1.800777  | -0.098161 |
| C | 2.449269  | -0.744816 | 0.282628  |
| O | 3.349667  | 0.083363  | -0.425443 |
| H | -1.594385 | -0.934343 | 1.128718  |
| H | -0.981660 | 0.990654  | -1.348041 |
| H | 0.302736  | 0.661521  | 1.410209  |
| H | 1.007221  | -0.567433 | -1.315321 |
| H | -1.534250 | -2.656615 | 0.240463  |
| H | -3.472991 | 0.262733  | -0.291365 |
| H | -1.835949 | 1.818556  | 1.225089  |
| H | 0.964394  | 2.566601  | 0.463283  |
| H | 2.745061  | -1.779641 | 0.095966  |
| H | 2.490263  | -0.555329 | 1.362812  |
| H | 3.068206  | 1.001889  | -0.296997 |

-----  
E + ZPE = -610.754455 a.u.  
H(298K) = -610.743031 a.u.  
G(298K) = -610.789975 a.u.

### P1-A

|   |           |           |           |
|---|-----------|-----------|-----------|
| O | -0.265615 | -1.676183 | -0.269084 |
| C | 0.998485  | -1.809832 | 0.346446  |
| C | 1.758788  | -0.540832 | 0.131180  |
| C | 1.086959  | 0.773010  | 0.342483  |
| C | -0.327546 | 0.718278  | -0.271560 |
| C | -1.026385 | -0.564407 | 0.194066  |
| O | 2.950442  | -0.570693 | -0.261058 |
| O | 1.892835  | 1.778034  | -0.203829 |
| O | -1.080448 | 1.829412  | 0.151518  |
| C | -2.425746 | -0.705955 | -0.400337 |
| O | -3.349451 | 0.164979  | 0.226546  |
| H | 1.521442  | -2.649635 | -0.110256 |
| H | 0.968684  | 0.872968  | 1.433200  |
| H | -0.235182 | 0.697069  | -1.364918 |
| H | -1.095808 | -0.580134 | 1.292541  |

|   |           |           |           |
|---|-----------|-----------|-----------|
| H | 0.913993  | -1.967331 | 1.432671  |
| H | 3.285512  | 0.355093  | -0.392722 |
| H | 2.103244  | 2.442671  | 0.466973  |
| H | -0.866998 | 2.594796  | -0.400640 |
| H | -2.772432 | -1.726299 | -0.222456 |
| H | -2.384148 | -0.533481 | -1.483992 |
| H | -3.007749 | 1.068314  | 0.143173  |

-----  
E + ZPE = -610.786003 a.u.  
H(298K) = -610.774196 a.u.  
G(298K) = -610.821963 a.u.

### TS-P1-B

|   |           |           |           |
|---|-----------|-----------|-----------|
| C | 0.398047  | -1.400302 | -0.599369 |
| C | -0.849905 | -1.092678 | 0.206083  |
| C | -1.237229 | 0.353640  | -0.091904 |
| C | -0.041783 | 1.274934  | 0.150103  |
| C | 1.246907  | 0.730402  | -0.491043 |
| H | 0.585029  | -2.424728 | -0.923236 |
| O | -1.859611 | -1.944992 | -0.273144 |
| H | -1.854152 | -2.771840 | 0.229595  |
| O | -2.366196 | 0.776446  | 0.632411  |
| H | -2.188959 | 0.717333  | 1.583266  |
| H | -1.517021 | 0.420117  | -1.149792 |
| H | 0.116491  | 1.359774  | 1.234807  |
| O | -0.272951 | 2.551849  | -0.407295 |
| H | -1.050048 | 2.935157  | 0.024953  |
| H | 1.657719  | 1.447904  | -1.198333 |
| C | 2.290253  | 0.238599  | 0.518358  |
| O | 1.726316  | -0.939939 | 1.083816  |
| H | 2.403705  | -1.623283 | 1.199316  |
| O | 1.022045  | -0.501555 | -1.251712 |
| H | 3.229899  | 0.018287  | 0.011434  |
| H | 2.436097  | 0.998918  | 1.289375  |
| H | -0.653338 | -1.239686 | 1.272645  |

-----  
E + ZPE = -610.767564 a.u.  
H(298K) = -610.756385 a.u.  
G(298K) = -610.802754 a.u.

### P1-B

|   |           |           |           |
|---|-----------|-----------|-----------|
| C | 0.946448  | -1.104882 | -0.393234 |
| C | -0.448855 | -1.254340 | 0.227459  |
| C | -1.252143 | 0.008835  | -0.088724 |
| C | -0.436850 | 1.268768  | 0.215219  |
| C | 0.984379  | 1.116524  | -0.363952 |
| H | 1.338230  | -2.019196 | -0.835924 |
| O | -1.023278 | -2.399071 | -0.364136 |
| H | -1.922165 | -2.501797 | -0.018950 |
| O | -2.509020 | 0.012845  | 0.555323  |
| H | -2.385807 | 0.026409  | 1.516368  |
| H | -1.470917 | 0.003604  | -1.161356 |
| H | -0.376312 | 1.408235  | 1.303770  |
| O | -1.024410 | 2.406381  | -0.385287 |
| H | -1.906724 | 2.530148  | -0.006285 |
| H | 1.257515  | 1.998330  | -0.941829 |
| C | 2.057077  | 0.764255  | 0.665392  |

|   |           |           |           |
|---|-----------|-----------|-----------|
| O | 1.873666  | -0.711494 | 0.751443  |
| H | 2.723705  | -1.197894 | 0.732285  |
| O | 1.062216  | -0.029023 | -1.236056 |
| H | 3.061178  | 0.943650  | 0.290204  |
| H | 1.898926  | 1.159907  | 1.664993  |
| H | -0.351367 | -1.383462 | 1.313480  |

-----  
E + ZPE = -610.778765 a.u.

H(298K) = -610.767814 a.u.

G(298K) = -610.813728 a.u.

### In Figure 6.

#### **RC-2-OC (RC-n-OC, n = 2)**

|   |           |           |           |
|---|-----------|-----------|-----------|
| C | -3.085227 | 0.570795  | -0.201205 |
| H | -3.066825 | 1.507728  | 0.363103  |
| O | -4.228420 | -0.209445 | 0.136783  |
| H | -3.073746 | 0.790588  | -1.276632 |
| C | -1.877755 | -0.279951 | 0.153900  |
| O | -1.936270 | -1.521154 | -0.531415 |
| C | -0.573478 | 0.398020  | -0.257855 |
| H | -1.865934 | -0.449260 | 1.241669  |
| C | 0.634211  | -0.483903 | 0.114780  |
| H | -0.590221 | 0.567559  | -1.341545 |
| O | -0.495202 | 1.624105  | 0.454447  |
| C | 1.889496  | -0.177166 | -0.696710 |
| O | 0.913894  | -0.393488 | 1.492822  |
| H | 0.394609  | -1.528095 | -0.115638 |
| C | 3.081561  | -0.962283 | -0.185075 |
| H | 1.739237  | -0.348894 | -1.765412 |
| O | 2.286745  | 1.230648  | -0.512104 |
| O | 4.058635  | -0.363627 | 0.208804  |
| H | 2.999054  | -2.056125 | -0.181362 |
| H | -5.017238 | 0.208009  | -0.230756 |
| H | 3.220553  | 1.231272  | -0.153876 |
| H | 0.759034  | 0.527581  | 1.761914  |
| H | -0.109957 | 2.313557  | -0.101001 |
| H | -2.838324 | -1.859801 | -0.431179 |
| H | 2.241861  | 1.766492  | -1.330996 |

-----  
E + ZPE = -687.164341 a.u.

H(298K) = -687.149549 a.u.

G(298K) = -687.204819 a.u.

#### **TS-2-OC (TS-n-OC, n = 2)**

|   |           |           |           |
|---|-----------|-----------|-----------|
| C | 2.928564  | 0.735011  | -0.137280 |
| H | 2.783938  | 1.397759  | -0.996235 |
| O | 4.119178  | -0.030465 | -0.269410 |
| H | 2.945910  | 1.326539  | 0.786285  |
| C | 1.796729  | -0.282154 | -0.068495 |
| O | 1.985265  | -1.155814 | 1.024994  |
| C | 0.468372  | 0.427783  | 0.144743  |
| H | 1.755728  | -0.842338 | -1.012706 |
| C | -0.681787 | -0.800974 | 0.273711  |

|   |           |           |           |
|---|-----------|-----------|-----------|
| H | 0.446897  | 0.964510  | 1.099138  |
| O | 0.189035  | 1.198988  | -0.946427 |
| C | -1.827152 | -0.280561 | 0.906948  |
| O | -0.752505 | -1.482248 | -0.918364 |
| H | -0.133904 | -1.376277 | 1.049993  |
| C | -3.224531 | -0.384650 | 0.362705  |
| H | -1.705005 | 0.123488  | 1.907583  |
| O | -2.071759 | 1.976726  | 0.311693  |
| O | -3.410809 | -0.793039 | -0.763353 |
| H | -4.039329 | -0.077628 | 1.029151  |
| H | 4.881984  | 0.542456  | -0.121458 |
| H | -2.834172 | 2.299023  | -0.193554 |
| H | -1.615436 | -1.340844 | -1.340535 |
| H | -0.538080 | 1.808256  | -0.717893 |
| H | 2.884445  | -1.511636 | 0.967305  |
| H | -2.061384 | 2.486783  | 1.135877  |

-----  
E + ZPE = -687.110435 a.u.

H(298K) = -687.094919 a.u.

G(298K) = -687.151078 a.u.

#### **PC-2-OC (PC-n-OC, n = 2)**

|   |           |           |           |
|---|-----------|-----------|-----------|
| C | 2.748197  | -1.112303 | 0.267645  |
| H | 2.525199  | -1.913307 | 0.980813  |
| O | 3.664708  | -0.171789 | 0.807575  |
| H | 3.138117  | -1.545230 | -0.660749 |
| C | 1.474001  | -0.324175 | -0.026140 |
| O | 1.724494  | 0.732487  | -0.928917 |
| C | 0.440394  | -1.223643 | -0.660982 |
| H | 1.067875  | 0.055619  | 0.923913  |
| C | -0.756369 | 2.127725  | -0.713768 |
| H | 0.238065  | -1.048886 | -1.732786 |
| O | -0.130321 | -2.100393 | -0.041981 |
| C | -1.575356 | 1.059095  | -0.421976 |
| O | -0.289819 | 2.917607  | 0.215437  |
| H | -0.474944 | 2.343634  | -1.740979 |
| C | -1.941562 | 0.790011  | 0.899223  |
| H | -1.916048 | 0.431048  | -1.236634 |
| O | -2.884092 | -1.909758 | -0.551655 |
| O | -2.612795 | -0.230556 | 1.275301  |
| H | -1.655927 | 1.467078  | 1.703752  |
| H | 4.560324  | -0.526690 | 0.742195  |
| H | -2.794939 | -0.922788 | 0.510325  |
| H | 0.271367  | 3.617951  | -0.155368 |
| H | -2.025149 | -2.370626 | -0.572818 |
| H | 2.519241  | 1.193095  | -0.619942 |
| H | -3.566415 | -2.581944 | -0.411809 |

-----  
E + ZPE = -687.179384 a.u.

H(298K) = -687.162291 a.u.

G(298K) = -687.223458 a.u.

#### **RC-3-OC (RC-n-OC, n = 3)**

|   |           |           |           |
|---|-----------|-----------|-----------|
| C | -2.616765 | -0.732888 | -0.830821 |
| H | -2.850113 | -0.495438 | -1.873161 |
| O | -3.790630 | -0.952078 | -0.060175 |



|   |           |           |           |
|---|-----------|-----------|-----------|
| H | -1.967903 | -1.613199 | -0.794710 |
| C | -1.952310 | 0.473406  | -0.192992 |
| O | -1.895184 | 0.235567  | 1.264889  |
| C | -0.533825 | 0.785128  | -0.658040 |
| H | -2.576190 | 1.361374  | -0.311179 |
| C | 0.467350  | -0.289983 | -0.200011 |
| H | -0.541438 | 0.802663  | -1.756177 |
| O | -0.231729 | 2.055744  | -0.115431 |
| C | 1.900438  | -0.026032 | -0.657255 |
| O | 0.439454  | -0.384143 | 1.239284  |
| H | 0.151938  | -1.265106 | -0.580777 |
| C | 2.790279  | -1.214686 | -0.347529 |
| H | 1.892308  | 0.090538  | -1.751707 |
| O | 2.377686  | 1.133709  | -0.018642 |
| O | 3.820539  | -1.070637 | 0.272338  |
| H | 2.463149  | -2.194949 | -0.727812 |
| H | -4.099124 | -1.857618 | -0.193475 |
| H | 3.283422  | 0.964650  | 0.292871  |
| H | 0.989936  | 0.332617  | 1.607590  |
| H | 0.704609  | 2.261522  | -0.261608 |
| H | -2.626153 | -0.372301 | 1.513357  |
| H | -0.916517 | -0.129715 | 1.498569  |

E + ZPE = -687.182199 a.u.  
H(298K) = -687.168237 a.u.  
G(298K) = -687.221078 a.u.

### TS-3-OC (TS-n-OC, n = 3)

|   |           |           |           |
|---|-----------|-----------|-----------|
| C | -3.067562 | 0.622876  | -0.060750 |
| H | -3.052051 | 1.473045  | 0.627896  |
| O | -4.177363 | -0.228228 | 0.187182  |
| H | -3.078592 | 0.986903  | -1.095755 |
| C | -1.840459 | -0.250752 | 0.152348  |
| O | -1.858780 | -1.366968 | -0.705563 |
| C | -0.556461 | 0.522520  | -0.110295 |
| H | -1.790986 | -0.566889 | 1.204783  |
| C | 0.567836  | -0.165962 | -0.610421 |
| H | -0.532135 | 0.750065  | -1.295442 |
| O | -0.474105 | 1.644866  | 0.648072  |
| C | 1.929670  | 0.423073  | -0.769389 |
| O | 1.173036  | -1.501488 | 1.168362  |
| H | 0.347501  | -1.084480 | -1.150534 |
| C | 2.999469  | -0.645166 | -0.520673 |
| H | 2.026560  | 0.684295  | -1.838019 |
| O | 2.138856  | 1.549885  | 0.032556  |
| O | 3.918457  | -0.392729 | 0.218136  |
| H | 2.898389  | -1.592013 | -1.067827 |
| H | -4.983597 | 0.199377  | -0.128117 |
| H | 2.881458  | 1.359640  | 0.634389  |
| H | 1.182020  | -0.986926 | 1.988897  |
| H | 0.451925  | 1.956196  | 0.673755  |
| H | -2.762977 | -1.717012 | -0.703375 |
| H | 0.456722  | -2.144440 | 1.274473  |

E + ZPE = -687.131412 a.u.  
H(298K) = -687.115558 a.u.  
G(298K) = -687.172670 a.u.

### PC-3-OC (PC-n-OC, n = 3)

|   |           |           |           |
|---|-----------|-----------|-----------|
| C | -2.763497 | -0.836667 | -0.028053 |
| H | -2.686212 | -1.597089 | -0.811505 |
| O | -4.007952 | -0.162544 | -0.073592 |
| H | -2.600953 | -1.294321 | 0.953491  |
| C | -1.717404 | 0.265324  | -0.270747 |
| O | -1.824578 | 1.282603  | 0.691313  |
| C | -0.347920 | -0.334888 | -0.194517 |
| H | -1.849644 | 0.654152  | -1.289204 |
| C | 0.440717  | -0.368192 | 1.067673  |
| H | -0.002188 | -1.193219 | 1.645940  |
| O | 0.026709  | -0.990780 | -1.203103 |
| C | 1.936766  | -0.624463 | 0.868641  |
| O | 0.602651  | 1.888236  | -0.628260 |
| H | 0.265934  | 0.545228  | 1.637853  |
| C | 2.719467  | 0.614248  | 0.467700  |
| H | 2.358017  | -0.951783 | 1.827550  |
| O | 2.115469  | -1.646184 | -0.114457 |
| O | 3.494699  | 0.575830  | -0.462645 |
| H | 2.595326  | 1.502437  | 1.102999  |
| H | -4.659006 | -0.659942 | 0.437366  |
| H | 2.948771  | -1.467471 | -0.590866 |
| H | 0.703920  | 2.101574  | -1.565826 |
| H | 0.956488  | -1.418328 | -0.982886 |
| H | -2.770529 | 1.467689  | 0.803250  |
| H | -0.124697 | 2.441616  | -0.306392 |

E + ZPE = -687.188275 a.u.  
H(298K) = -687.172489 a.u.  
G(298K) = -687.229140 a.u.

### RC-4-OC (RC-n-OC, n = 4)

= RC-2-OC (RC-n-OC, n = 2)

### TS-4-OC (TS-n-OC, n = 4)

|   |           |           |           |
|---|-----------|-----------|-----------|
| C | 3.040248  | 0.567809  | 0.049407  |
| H | 2.929004  | 1.558854  | -0.392961 |
| O | 4.137963  | -0.064680 | -0.577133 |
| H | 3.200583  | 0.674061  | 1.128579  |
| C | 1.773049  | -0.210197 | -0.207707 |
| O | 1.786301  | -1.468297 | 0.533742  |
| C | 0.631373  | -0.021861 | 0.678382  |
| H | 1.558003  | -0.367988 | -1.263245 |
| C | -0.716971 | -0.656437 | 0.397020  |
| H | 0.830569  | 0.298673  | 1.696218  |
| O | 0.395536  | 2.099477  | 0.230283  |
| C | -1.886420 | 0.339891  | 0.390254  |
| O | -0.695356 | -1.410680 | -0.785239 |
| H | -0.875554 | -1.353960 | 1.228702  |
| C | -3.193232 | -0.425194 | 0.505748  |
| H | -1.814830 | 0.993974  | 1.270750  |
| O | -1.851440 | 1.073518  | -0.808172 |
| O | -4.068504 | -0.275804 | -0.316796 |
| H | -3.305170 | -1.096661 | 1.370962  |



|   |           |           |           |
|---|-----------|-----------|-----------|
| H | 4.362910  | -0.864715 | -0.082819 |
| H | -2.739601 | 1.057040  | -1.205626 |
| H | -0.868614 | -0.815447 | -1.534001 |
| H | -0.381169 | 2.241075  | -0.338181 |
| H | 1.328870  | -2.148457 | 0.003124  |
| H | 0.250725  | 2.631219  | 1.026400  |

-----  
E + ZPE = -687.128617 a.u.

H(298K) = -687.113510 a.u.

G(298K) = -687.169114 a.u.

### PC-4-OC (PC-n-OC, n = 4)

|   |           |           |           |
|---|-----------|-----------|-----------|
| C | 2.860641  | 0.528639  | -0.009207 |
| H | 2.650702  | 1.554171  | -0.320639 |
| O | 3.910326  | 0.032177  | -0.810403 |
| H | 3.119786  | 0.533493  | 1.054622  |
| C | 1.596728  | -0.250852 | -0.225925 |
| O | 1.598985  | -1.552732 | 0.554609  |
| C | 0.619132  | -0.455570 | 0.839984  |
| H | 1.300676  | -0.431812 | -1.255953 |
| C | -0.805352 | -0.907791 | 0.572503  |
| H | 0.824072  | -0.027782 | 1.816818  |
| O | 0.553902  | 2.565226  | 0.447620  |
| C | -1.727171 | 0.296184  | 0.377447  |
| O | -0.832146 | -1.774093 | -0.537716 |
| H | -1.133256 | -1.480150 | 1.445811  |
| C | -3.173984 | -0.157678 | 0.329301  |
| H | -1.627136 | 0.966270  | 1.245393  |
| O | -1.366532 | 0.946108  | -0.817923 |
| O | -3.881652 | 0.141514  | -0.606425 |
| H | -3.540018 | -0.748793 | 1.182601  |
| H | 4.249655  | -0.785087 | -0.420524 |
| H | -2.176770 | 1.118033  | -1.329227 |
| H | -0.941031 | -1.251194 | -1.350186 |
| H | -0.147938 | 2.299299  | -0.169130 |
| H | 1.139237  | -2.252228 | 0.028472  |
| H | 0.199008  | 3.322589  | 0.929215  |

-----  
E + ZPE = -687.142288 a.u.

H(298K) = -687.126601 a.u.

G(298K) = -687.183587 a.u.

### RC-5-OC (RC-n-OC, n = 5)

= RC-3-OC (RC-n-OC, n = 3)

### TS-5-OC (TS-n-OC, n = 5)

|   |           |           |           |
|---|-----------|-----------|-----------|
| C | -3.045412 | -0.472131 | 0.413419  |
| H | -3.012770 | -1.479731 | 0.846762  |
| O | -3.951773 | -0.375598 | -0.661353 |
| H | -3.277820 | 0.233453  | 1.220881  |

|   |           |           |           |
|---|-----------|-----------|-----------|
| C | -1.687453 | -0.140158 | -0.084497 |
| O | -1.828314 | 2.049415  | 0.161517  |
| C | -0.502076 | -0.359782 | 0.736295  |
| H | -1.534453 | 0.091298  | -1.133286 |
| C | 0.752838  | 0.465132  | 0.455160  |
| H | -0.675643 | -0.502976 | 1.802172  |
| O | -0.629906 | -1.652024 | 0.077488  |
| C | 2.002814  | -0.424441 | 0.514519  |
| O | 0.698430  | 1.156152  | -0.773108 |
| H | 0.799042  | 1.223738  | 1.242035  |
| C | 3.248127  | 0.435248  | 0.471462  |
| H | 2.010501  | -0.981126 | 1.462124  |
| O | 1.970982  | -1.309477 | -0.584335 |
| O | 4.064042  | 0.298645  | -0.413759 |
| H | 3.369667  | 1.179025  | 1.273530  |
| H | -4.845140 | -0.537454 | -0.330835 |
| H | 2.775416  | -1.171948 | -1.114965 |
| H | 0.905158  | 0.548057  | -1.501167 |
| H | 0.035719  | -1.739658 | -0.636784 |
| H | -1.108475 | 2.351976  | -0.415520 |
| H | -2.641916 | 2.425225  | -0.204687 |

-----  
E + ZPE = -687.130363 a.u.

H(298K) = -687.114917 a.u.

G(298K) = -687.171410 a.u.

### PC-5-OC (PC-n-OC, n = 5)

|   |           |           |           |
|---|-----------|-----------|-----------|
| C | -2.860170 | -1.100230 | -0.194840 |
| H | -3.218357 | -1.634214 | -1.078841 |
| O | -3.561393 | 0.126613  | -0.019660 |
| H | -2.964502 | -1.742220 | 0.686766  |
| C | -1.418291 | -0.711991 | -0.377627 |
| O | -1.816128 | 2.367539  | -0.005454 |
| C | -0.559588 | -0.486028 | 0.792230  |
| H | -1.162221 | -0.197168 | -1.299934 |
| C | 0.643076  | 0.452340  | 0.693998  |
| H | -0.959166 | -0.672789 | 1.784713  |
| O | -0.455992 | -1.716030 | 0.001626  |
| C | 1.950848  | -0.344071 | 0.665217  |
| O | 0.632735  | 1.240315  | -0.470827 |
| H | 0.655744  | 1.069554  | 1.600230  |
| C | 3.113724  | 0.559322  | 0.313317  |
| H | 2.126544  | -0.861086 | 1.611089  |
| O | 1.881937  | -1.366346 | -0.368784 |
| O | 3.707693  | 0.405874  | -0.729323 |
| H | 3.359337  | 1.347865  | 1.038204  |
| H | -4.472652 | 0.029831  | -0.324124 |
| H | 2.314473  | -1.055493 | -1.194903 |
| H | -0.191891 | 1.774658  | -0.452875 |
| H | 0.845604  | -1.650209 | -0.460532 |
| H | -2.107049 | 3.176890  | -0.444312 |
| H | -2.554280 | 1.734617  | -0.079865 |

-----  
E + ZPE = -687.150110 a.u.

H(298K) = -687.134997 a.u.

G(298K) = -687.190967 a.u.

### RC-6-OC (RC-n-OC, n = 6)

```
-----  
C      -2.946891  0.690086  -0.092103  
C      -1.787083  -0.256900  0.164939  
C      -0.484391  0.373857  -0.323813  
O      -0.395290  1.627261  0.334996  
O      -2.095337  -1.435647  -0.567892  
C      0.725091  -0.509070  0.008079  
O      0.931471  -0.574550  1.406889  
C      1.989824  -0.015014  -0.712045  
O      2.235776  1.350900  -0.454499  
C      3.160086  -0.861818  -0.272289  
O      4.131349  -0.366004  0.259257  
O      -4.149683  -0.131674  0.171982  
H      -2.993432  1.523303  0.602256  
H      -2.995099  1.012369  -1.133125  
H      -1.718911  -0.476339  1.236096  
H      -0.546848  0.499332  -1.414185  
H      0.528817  -1.530182  -0.336834  
H      1.852600  -0.165451  -1.792122  
H      3.080533  -1.946733  -0.444820  
H      -3.994166  -1.025612  -0.222817  
H      3.042029  1.418557  0.084933  
H      0.876872  0.325208  1.764653  
H      0.444891  2.039839  0.074022  
H      -1.808900  -2.217393  -0.076476  
H      -4.974493  0.253965  -0.184066  
-----
```

E + ZPE = -687.175705 a.u.  
H(298K) = -687.161119 a.u.  
G(298K) = -687.215843 a.u.

### TS-6-OC (TS-n-OC, n = 6)

```
-----  
C      -2.453698  0.488824  -0.531506  
H      -2.670166  1.519378  -0.278289  
O      -4.664073  0.037328  -0.192639  
H      -2.599612  0.137585  -1.547418  
C      -1.804270  -0.331365  0.393519  
O      -1.745730  -1.655442  0.098561  
C      -0.480589  0.621557  -0.198257  
H      -1.795707  -0.057631  1.446618  
C      0.668981  -0.400294  -0.207498  
H      -0.554544  1.036864  -1.214631  
O      -0.366071  1.612119  0.773562  
C      1.958095  0.275952  -0.708310  
O      0.839915  -0.981202  1.063445  
H      0.413375  -1.203525  -0.903549  
C      3.083153  -0.735724  -0.643961  
H      1.814282  0.554659  -1.761217  
O      2.270273  1.420451  0.049516  
O      4.077047  -0.515957  0.013498  
H      2.947437  -1.670479  -1.209712  
H      -4.893516  -0.804753  -0.609751  
H      3.086055  1.245202  0.549918  
H      1.042603  -0.286849  1.710240  
H      0.478806  2.076127  0.632188  
H      -1.174745  -2.097570  0.747636  
H      -5.215184  0.698923  -0.633494  
-----
```

E + ZPE = -687.128051 a.u.

H(298K) = -687.111964 a.u.  
G(298K) = -687.169871 a.u.

### PC-6-OC (PC-n-OC, n = 6)

```
-----  
C      1.326143  -1.574784  -0.735061  
H      1.792088  -2.518450  -0.416022  
O      4.154880  1.739473  0.662256  
H      1.402671  -1.493041  -1.820865  
C      2.116954  -0.511853  -0.082092  
O      2.937267  0.163696  -0.735598  
C      -0.127621  -1.581981  -0.257153  
H      2.047770  -0.361475  0.997895  
C      -0.787398  -0.250203  -0.634018  
H      -0.658380  -2.400811  -0.757031  
O      -0.084721  -1.777998  1.146787  
C      -2.275108  -0.193049  -0.269294  
O      -0.076143  0.819333  -0.030796  
H      -0.695169  -0.119316  -1.717233  
C      -2.860130  1.121504  -0.734148  
H      -2.794652  -0.996995  -0.810308  
O      -2.445455  -0.346876  1.122039  
O      -3.395527  1.878138  0.047908  
H      -2.772261  1.354399  -1.806822  
H      5.085248  1.503626  0.797410  
H      -2.916606  0.433101  1.462025  
H      -0.252138  0.804620  0.923992  
H      -0.962433  -1.596182  1.518872  
H      3.502202  0.877692  -0.129191  
H      4.142220  2.648898  0.327114  
-----
```

E + ZPE = -687.197828 a.u.  
H(298K) = -687.182351 a.u.  
G(298K) = -687.239571 a.u.

### In Figure 8.

### RC-1-OC (RC-n-OC, n = 1)

= PC-5-BP-Iso-2 (PC-n-BP-Iso-m, n = 5, m = 2)

### TS-1-OC (TS-n-OC, n = 1)

```
-----  
C      2.924087  -0.558940  -0.699476  
O      4.193287  -0.210066  -0.156473  
C      1.888619  0.056803  0.225618  
O      2.065948  1.461868  0.294594  
C      0.472286  -0.198707  -0.283803  
C      -0.560279  0.521765  0.603979  
C      -1.917713  0.492049  -0.084902  
C      -2.926601  -0.416893  0.260266  
O      -3.987109  -0.481514  -0.510389  
O      0.243595  -1.594555  -0.205281  
O      -0.639128  -0.063115  1.874799  
-----
```

|   |           |           |           |
|---|-----------|-----------|-----------|
| O | -2.002399 | 1.252023  | -1.172764 |
| H | 2.796075  | -1.645127 | -0.739284 |
| H | 2.807315  | -0.138665 | -1.706479 |
| H | 1.994961  | -0.388639 | 1.226118  |
| H | 0.384589  | 0.168560  | -1.312930 |
| H | -0.278837 | 1.572317  | 0.712417  |
| H | -2.751840 | 0.823487  | 0.866855  |
| H | -2.814045 | -1.064740 | 1.126078  |
| H | 4.882235  | -0.426241 | -0.797152 |
| H | -2.792878 | 1.049352  | -1.704046 |
| H | -0.458074 | -1.013919 | 1.784400  |
| H | -0.344245 | -1.876643 | -0.918692 |
| H | 3.011142  | 1.624337  | 0.431530  |
| H | -4.712340 | -0.977674 | -0.094797 |

-----  
E + ZPE = -687.148001 a.u.  
H(298K) = -687.133849 a.u.  
G(298K) = -687.187322 a.u.

### PC-1-OC (PC-n-OC, n = 1)

|   |           |           |           |
|---|-----------|-----------|-----------|
| C | 3.022686  | -0.148656 | -0.788894 |
| O | 4.242305  | 0.021420  | -0.074579 |
| C | 1.916807  | -0.012027 | 0.244015  |
| O | 1.986092  | 1.255434  | 0.873472  |
| C | 0.538754  | -0.116696 | -0.403561 |
| C | -0.559773 | 0.114489  | 0.668817  |
| C | -1.882726 | 0.395237  | 0.039304  |
| C | -3.093606 | -0.430895 | 0.288044  |
| O | -4.174624 | 0.146603  | -0.393260 |
| O | 0.406705  | -1.426886 | -0.914360 |
| O | -0.657769 | -0.965590 | 1.552460  |
| O | -1.983415 | 1.391286  | -0.725307 |
| H | 2.976524  | -1.133019 | -1.264868 |
| H | 2.908470  | 0.632992  | -1.550342 |
| H | 2.022610  | -0.814054 | 0.989545  |
| H | 0.444341  | 0.641536  | -1.188813 |
| H | -0.300214 | 1.019971  | 1.233736  |
| H | -3.264893 | -0.446088 | 1.372035  |
| H | -2.865818 | -1.459789 | -0.020291 |
| H | 4.964945  | 0.143767  | -0.702765 |
| H | -2.921125 | 1.459002  | -1.049148 |
| H | -0.487862 | -1.781767 | 1.051657  |
| H | -0.139481 | -1.424223 | -1.712868 |
| H | 2.908881  | 1.399395  | 1.130832  |
| H | -4.453563 | -0.424557 | -1.122457 |

-----  
E + ZPE = -687.177228 a.u.  
H(298K) = -687.162425 a.u.  
G(298K) = -687.217718 a.u.

### In Figure 12.

#### 12T (12T)

|    |          |          |          |
|----|----------|----------|----------|
| Si | 2.879446 | 2.180101 | 2.468566 |
| H  | 3.542558 | 2.853776 | 3.542057 |
| O  | 1.673370 | 0.948131 | 2.849424 |

|    |           |           |           |
|----|-----------|-----------|-----------|
| O  | 1.926763  | 3.141615  | 1.355577  |
| O  | 3.867654  | 1.316360  | 1.313248  |
| Si | 0.741096  | 0.079231  | 1.673144  |
| O  | -0.468419 | -0.097913 | 3.074278  |
| Al | -1.843588 | -0.829160 | 2.153001  |
| O  | -2.720262 | -2.264316 | 2.494870  |
| Si | -3.370879 | -3.110170 | 1.107279  |
| H  | -4.205845 | -4.249543 | 1.326626  |
| O  | 0.088121  | 1.309630  | 0.765190  |
| O  | 2.035020  | -0.540120 | 0.777425  |
| O  | -2.757928 | 0.248562  | 1.181964  |
| O  | -0.311181 | -1.289838 | 1.140238  |
| O  | -3.983296 | -1.793247 | 0.133466  |
| O  | -1.859269 | -3.339805 | 0.254341  |
| Si | 0.996759  | 2.593748  | -0.013539 |
| Si | -3.226931 | -0.311159 | -0.395445 |
| Si | -0.697043 | -2.221777 | -0.363249 |
| Si | 3.262713  | 0.417017  | -0.042202 |
| O  | -3.870659 | 0.838632  | -1.448034 |
| O  | -1.780588 | -1.064205 | -1.030560 |
| O  | 0.557172  | -2.890735 | -1.252352 |
| O  | 4.237702  | -0.471495 | -1.090839 |
| O  | 2.249970  | 1.644134  | -0.759221 |
| O  | 0.037547  | 3.638393  | -0.920280 |
| Si | 1.868010  | -3.777788 | -1.922070 |
| O  | 3.195022  | -2.741398 | -2.208320 |
| Si | 4.538994  | -1.685250 | -2.269085 |
| Si | -1.347589 | 4.392474  | -1.602866 |
| Si | -3.814660 | 2.201451  | -2.494982 |
| O  | -2.518940 | 3.223917  | -2.039804 |
| H  | 2.259946  | -4.824767 | -1.005854 |
| H  | 1.436042  | -4.319394 | -3.191235 |
| H  | 5.746404  | -2.397821 | -1.918343 |
| H  | 4.637146  | -1.091793 | -3.582607 |
| H  | -1.913823 | 5.306334  | -0.636203 |
| H  | -0.923525 | 5.086956  | -2.798486 |
| H  | -5.060553 | 2.923108  | -2.359742 |
| H  | -3.613763 | 1.753128  | -3.854637 |
| H  | -0.339145 | 0.598400  | 3.726817  |

-----  
E + ZPE = -1064.462645 a.u.  
H(298K) = -1064.425794 a.u.  
G(298K) = -1064.530022 a.u.

### $\beta$ -glucopyranose (12T)

|   |           |           |           |
|---|-----------|-----------|-----------|
| C | -1.210799 | -1.210694 | -0.307599 |
| C | -1.656266 | 0.159957  | 0.202126  |
| C | -0.641820 | 1.208622  | -0.209032 |
| C | 0.727562  | 0.794265  | 0.295776  |
| C | 1.075979  | -0.600850 | -0.228127 |
| O | 0.069722  | -1.516355 | 0.194660  |
| H | -1.704772 | 0.119342  | 1.303310  |
| O | -0.925526 | 2.479722  | 0.338718  |
| H | -0.615047 | 1.266285  | -1.309670 |
| H | 0.695536  | 0.752295  | 1.396789  |
| O | 1.725404  | 1.702311  | -0.128737 |
| H | 1.125775  | -0.574297 | -1.328885 |
| C | 2.411675  | -1.110707 | 0.304032  |
| H | -1.212418 | -1.218633 | -1.408326 |
| O | -2.098066 | -2.205067 | 0.097564  |
| O | -2.901571 | 0.530541  | -0.345097 |

```
H      -1.884695  -2.434583  1.012904
H      -3.534796  -0.177579  -0.167625
H      -1.814894  2.738358  0.064538
H      1.416320  2.595903  0.074513
H      2.490268  -2.176328  0.074668
O      3.503627  -0.469381  -0.310506
H      2.430923  -0.995053  1.398742
H      3.381097  0.486557  -0.226831
```

```
-----
E + ZPE = -686.757161 a.u.
H(298K) = -686.744235 a.u.
G(298K) = -686.794218 a.u.
```

### In Figure 13.

#### RC-1(12T) [RC-1(12T), n = 1]

```
-----
Atomic      Coordinates (Angstroms)
Number      X          Y          Z
-----
  8      -0.905000  0.115999  -1.846962
 13      -0.267444  1.585017  -0.819654
 14      -0.071847  -1.322673  -1.487674
  1      -1.877787  -0.085565  -1.918133
  8      -3.307530  -0.965114  -1.683948
  1      -3.213426  -1.883542  -1.977098
  6      -3.813321  -0.959077  -0.319693
  8      -5.187174  -1.142149  -0.328502
  6      -6.063005  -0.042865  -0.657806
  6      -5.342346  1.297313  -0.595456
  6      -4.414634  1.328358  0.612185
  6      -3.297312  0.324532  0.375652
  6      -6.726541  -0.307590  -1.999813
  8      -5.834968  -0.215026  -3.090571
  1      -4.994360  -0.620619  -2.839917
  1      -7.201369  -1.298083  -1.960977
  1      -7.501577  0.447987  -2.154946
  1      -4.739789  1.442679  -1.510270
  8      -6.327725  2.299043  -0.506946
  1      -5.874039  3.093184  -0.188200
  1      -4.974132  1.058162  1.516733
  8      -3.925241  2.638881  0.798678
  1      -3.089766  2.763488  0.305798
  1      -3.391509  -1.817527  0.206526
  1      -2.626548  0.830736  -0.331098
  8      -2.614489  0.000913  1.547158
  1      -1.654615  0.150243  1.384597
  8      -0.118926  0.802582  0.759194
  8      1.259864  2.029257  -1.467433
  8      -1.278643  2.998830  -0.551805
  8      1.486162  -0.898854  -1.500850
  8      -0.578921  -1.862926  -0.035918
  8      -0.379442  -2.489744  -2.599114
  1      -6.835649  -0.036411  0.119982
 14      -0.474086  4.202014  0.462185
 14      2.293092  2.998839  -0.463915
 14      0.767368  1.713644  1.962668
 14      2.748313  -2.040102  -1.070117
 14      0.355068  -3.146193  0.735955
 14      0.539848  -3.991068  -2.351793
  8      0.163468  -4.171357  -0.660583
```

```
  8      1.967647  -2.619142  0.367360
  8      2.103067  -3.262589  -2.133205
  1      0.360849  -5.082819  -3.253680
  8      1.156207  4.284691  -0.170668
  8      2.182841  2.191158  1.077956
  8      -0.113673  3.207905  1.855903
  1      -1.162389  5.440133  0.668397
  8      3.871042  3.172878  -1.051403
 14      5.293081  2.615271  -1.829318
  8      5.518607  0.965411  -1.405499
 14      5.804707  -0.636009  -0.905112
  8      4.344675  -1.549683  -1.054760
  8      0.000862  -3.517585  2.328780
 14      -0.293308  -3.170880  3.999429
  8      0.473898  -1.685930  4.330857
 14      1.203274  -0.183846  4.727477
  8      0.980639  0.901201  3.426282
  1      6.419523  3.374587  -1.334013
  1      5.175394  2.723439  -3.265125
  1      6.221856  -0.679338  0.476955
  1      6.777446  -1.250721  -1.779676
  1      0.324035  -4.226170  4.770679
  1      -1.716981  -3.105691  4.226014
  1      0.563373  0.340554  5.912328
  1      2.616078  -0.403140  4.941209
```

```
-----
E + ZPE = -1751.230285 a.u.
H(298K) = -1751.179727 a.u.
G(298K) = -1751.315185 a.u.
```

#### TS-1(12T) [TS-n(12T), n = 1]

```
-----
Atomic      Coordinates (Angstroms)
Number      X          Y          Z
-----
  8      -0.914702  0.158407  -1.807761
 13      -0.193265  1.574365  -0.949315
 14      -0.189551  -1.242015  -1.404503
  1      -2.438002  -0.407618  -2.122074
  8      -3.206069  -1.037400  -1.986772
  1      -2.810171  -1.908523  -2.173146
  6      -3.749850  -0.833766  -0.016522
  8      -5.003277  -1.074359  -0.123961
  6      -5.970335  -0.014846  -0.471196
  6      -5.271427  1.318138  -0.687865
  6      -4.265270  1.586181  0.424581
  6      -3.171607  0.530452  0.331561
  6      -6.734632  -0.519066  -1.683769
  8      -5.974665  -0.508046  -2.864512
  1      -5.108891  -0.917115  -2.718488
  1      -7.127596  -1.520593  -1.458557
  1      -7.577658  0.159367  -1.839132
  1      -4.742187  1.301340  -1.655393
  8      -6.285601  2.290415  -0.700391
  1      -5.838944  3.145187  -0.602593
  1      -4.766218  1.504626  1.400080
  8      -3.779623  2.894977  0.292213
  1      -2.874069  2.926144  -0.098420
  1      -3.136601  -1.687153  0.268885
  1      -2.522581  0.825461  -0.498371
  8      -2.467082  0.342807  1.506892
  1      -1.477314  0.490936  1.297789
  8      -0.094562  0.954486  0.754336
```

|    |           |           |           |
|----|-----------|-----------|-----------|
| 8  | 1.392602  | 1.945347  | -1.523004 |
| 8  | -1.130881 | 3.070757  | -0.744883 |
| 8  | 1.437152  | -1.097714 | -1.446509 |
| 8  | -0.662090 | -1.754516 | 0.100013  |
| 8  | -0.622680 | -2.508078 | -2.405752 |
| 1  | -6.635136 | 0.051517  | 0.395097  |
| 14 | -0.259341 | 4.299763  | 0.178274  |
| 14 | 2.466031  | 2.925086  | -0.591435 |
| 14 | 0.852754  | 1.903037  | 1.881344  |
| 14 | 2.603190  | -2.319277 | -0.995653 |
| 14 | 0.199958  | -3.070175 | 0.899067  |
| 14 | 0.196970  | -4.059148 | -2.104415 |
| 8  | -0.148224 | -4.190805 | -0.394770 |
| 8  | 1.866977  | -2.771002 | 0.517641  |
| 8  | 1.863339  | -3.564745 | -1.975042 |
| 1  | -0.137564 | -5.158601 | -2.955569 |
| 8  | 1.388642  | 4.285739  | -0.412822 |
| 8  | 2.309648  | 2.252307  | 1.012144  |
| 8  | 0.026015  | 3.417221  | 1.664111  |
| 1  | -0.897237 | 5.578968  | 0.280805  |
| 8  | 4.057235  | 2.948967  | -1.176904 |
| 14 | 5.400437  | 2.202442  | -1.938867 |
| 8  | 5.500162  | 0.561351  | -1.440453 |
| 14 | 5.711978  | -1.045868 | -0.915270 |
| 8  | 4.230403  | -1.922468 | -1.041417 |
| 8  | -0.194762 | -3.292302 | 2.517702  |
| 14 | -0.429957 | -2.811681 | 4.158789  |
| 8  | 0.422027  | -1.357659 | 4.409531  |
| 14 | 1.246499  | 0.116438  | 4.717964  |
| 8  | 1.004439  | 1.176433  | 3.401521  |
| 1  | 6.601652  | 2.880588  | -1.501908 |
| 1  | 5.272367  | 2.253608  | -3.377615 |
| 1  | 6.138917  | -1.072893 | 0.465105  |
| 1  | 6.666480  | -1.706999 | -1.777435 |
| 1  | 0.108524  | -3.849821 | 5.008702  |
| 1  | -1.847287 | -2.635035 | 4.381796  |
| 1  | 0.685820  | 0.704788  | 5.914155  |
| 1  | 2.653929  | -0.168871 | 4.883286  |

-----  
 E + ZPE = -1751.205283 a.u.

H(298K) = -1751.155302 a.u.

G(298K) = -1751.287656 a.u.

### PC-1(12T) [PC-n(12T), n = 1]

| Atomic Number | Coordinates (Angstroms) |           |           |
|---------------|-------------------------|-----------|-----------|
|               | X                       | Y         | Z         |
| 8             | -0.959597               | 0.247922  | -1.785669 |
| 13            | -0.114792               | 1.584207  | -0.939077 |
| 14            | -0.340584               | -1.200697 | -1.408606 |
| 1             | -2.737306               | -0.401418 | -2.485346 |
| 8             | -3.334025               | -1.137621 | -2.260438 |
| 1             | -2.808718               | -1.925192 | -2.480565 |
| 6             | -3.797722               | -0.685253 | 0.250283  |
| 8             | -5.018318               | -0.889747 | 0.016575  |
| 6             | -5.948949               | 0.204685  | -0.368144 |
| 6             | -5.174790               | 1.471740  | -0.690910 |
| 6             | -4.139102               | 1.785598  | 0.386014  |
| 6             | -3.131390               | 0.642416  | 0.408142  |
| 6             | -6.764198               | -0.347933 | -1.526658 |
| 8             | -6.044989               | -0.431187 | -2.724021 |

|    |           |           |           |
|----|-----------|-----------|-----------|
| 1  | -5.206763 | -0.910564 | -2.606554 |
| 1  | -7.184650 | -1.317783 | -1.223740 |
| 1  | -7.589109 | 0.350556  | -1.691867 |
| 1  | -4.660875 | 1.342566  | -1.657873 |
| 8  | -6.135163 | 2.492850  | -0.775124 |
| 1  | -5.640425 | 3.326818  | -0.772064 |
| 1  | -4.638824 | 1.833535  | 1.366175  |
| 8  | -3.588887 | 3.038777  | 0.106681  |
| 1  | -2.639146 | 3.014440  | -0.192866 |
| 1  | -3.193292 | -1.569603 | 0.458926  |
| 1  | -2.501088 | 0.718364  | -0.495480 |
| 8  | -2.385266 | 0.536936  | 1.569403  |
| 1  | -1.388400 | 0.636699  | 1.318975  |
| 8  | -0.013288 | 0.954186  | 0.770512  |
| 8  | 1.477512  | 1.915275  | -1.522870 |
| 8  | -0.983150 | 3.121630  | -0.684713 |
| 8  | 1.299514  | -1.124623 | -1.422760 |
| 8  | -0.832374 | -1.719656 | 0.091716  |
| 8  | -0.765192 | -2.453481 | -2.434575 |
| 1  | -6.580173 | 0.351517  | 0.513474  |
| 14 | -0.052533 | 4.304337  | 0.242648  |
| 14 | 2.603042  | 2.844400  | -0.602874 |
| 14 | 1.005509  | 1.843142  | 1.886398  |
| 14 | 2.453756  | -2.361304 | -0.991482 |
| 14 | 0.021806  | -3.055367 | 0.868974  |
| 14 | 0.027076  | -4.020993 | -2.142058 |
| 8  | -0.337001 | -4.158402 | -0.435999 |
| 8  | 1.703088  | -2.807401 | 0.517786  |
| 8  | 1.708158  | -3.586293 | -1.993457 |
| 1  | -0.328263 | -5.103563 | -3.006772 |
| 8  | 1.581108  | 4.240750  | -0.382505 |
| 8  | 2.455821  | 2.150195  | 0.993330  |
| 8  | 0.231373  | 3.390143  | 1.709077  |
| 1  | -0.641463 | 5.603694  | 0.378138  |
| 8  | 4.184345  | 2.821307  | -1.213677 |
| 14 | 5.492534  | 2.018750  | -1.980352 |
| 8  | 5.514218  | 0.378240  | -1.473519 |
| 14 | 5.622138  | -1.225815 | -0.907700 |
| 8  | 4.092182  | -2.012225 | -1.029208 |
| 8  | -0.387829 | -3.275265 | 2.486346  |
| 14 | -0.562766 | -2.794028 | 4.133972  |
| 8  | 0.396671  | -1.409165 | 4.388225  |
| 14 | 1.348572  | -0.011671 | 4.685841  |
| 8  | 1.152970  | 1.084832  | 3.391501  |
| 1  | 6.723949  | 2.645255  | -1.550665 |
| 1  | 5.360062  | 2.071608  | -3.418565 |
| 1  | 6.037085  | -1.245380 | 0.476460  |
| 1  | 6.543767  | -1.960901 | -1.745531 |
| 1  | -0.098037 | -3.876572 | 4.971816  |
| 1  | -1.960972 | -2.512063 | 4.372694  |
| 1  | 0.874241  | 0.602472  | 5.906287  |
| 1  | 2.732839  | -0.411073 | 4.803000  |

-----  
 E + ZPE = -1751.210065 a.u.

H(298K) = -1751.159045 a.u.

G(298K) = -1751.293341 a.u.

### PC'-1 (12T)

| Atomic Number | Coordinates (Angstroms) |   |   |
|---------------|-------------------------|---|---|
|               | X                       | Y | Z |

|    |           |           |           |
|----|-----------|-----------|-----------|
| 8  | -1.637179 | -2.541595 | -3.569201 |
| 6  | -3.713287 | -1.686442 | -1.383716 |
| 8  | -4.952323 | -1.866989 | -0.811522 |
| 6  | -5.548797 | -0.720890 | -0.201863 |
| 6  | -5.466821 | 0.458584  | -1.168228 |
| 6  | -4.022303 | 0.877485  | -1.355429 |
| 6  | -3.200408 | -0.349201 | -1.709269 |
| 6  | -6.984932 | -1.112144 | 0.130898  |
| 8  | -7.580957 | -0.222211 | 1.046154  |
| 1  | -7.564752 | -1.188744 | -0.801325 |
| 1  | -6.969570 | -2.098798 | 0.600922  |
| 1  | -1.252509 | -1.655387 | -3.565988 |
| 1  | -0.898268 | -3.106149 | -3.305435 |
| 1  | -3.405107 | -2.555799 | -1.953067 |
| 1  | -2.492818 | -0.234616 | -2.528181 |
| 8  | -2.706199 | -1.095317 | -0.580958 |
| 1  | -1.042720 | -0.215998 | 0.275907  |
| 1  | -3.072780 | 2.204256  | -2.395342 |
| 8  | -3.986323 | 1.855164  | -2.368182 |
| 1  | -3.652605 | 1.286202  | -0.400096 |
| 1  | -5.862332 | 0.131233  | -2.143187 |
| 8  | -6.243038 | 1.528892  | -0.658888 |
| 1  | -6.049839 | 2.303494  | -1.204511 |
| 1  | -5.024958 | -0.476139 | 0.732850  |
| 1  | -7.523972 | 0.666344  | 0.668596  |
| 8  | -0.097370 | -0.371990 | -2.270418 |
| 14 | 0.853354  | -1.471859 | -1.555571 |
| 13 | -0.160647 | 1.209717  | -1.514938 |
| 8  | -0.799124 | 0.722456  | 0.261976  |
| 8  | -1.277795 | 2.520941  | -1.883337 |
| 8  | 1.385613  | 1.899479  | -1.186750 |
| 8  | 0.305152  | -1.768334 | -0.005340 |
| 8  | 2.399412  | -0.925141 | -1.419508 |
| 8  | 0.956469  | -2.963095 | -2.287320 |
| 14 | 1.203671  | -2.773972 | 1.129204  |
| 14 | 2.018352  | -4.194367 | -1.568286 |
| 14 | 3.670237  | -1.715700 | -0.509017 |
| 14 | -1.185280 | 3.973356  | -0.901400 |
| 14 | -0.687471 | 1.997966  | 1.528510  |
| 14 | 1.765058  | 3.165493  | -0.088413 |
| 8  | 2.788005  | -2.079135 | 0.947432  |
| 8  | 1.411847  | -4.139472 | 0.069208  |
| 8  | 3.469098  | -3.260668 | -1.297428 |
| 1  | 2.125034  | -5.457966 | -2.227623 |
| 1  | -2.002900 | 5.083075  | -1.281713 |
| 8  | -1.529664 | 3.203330  | 0.646343  |
| 8  | 0.511851  | 4.256958  | -0.619093 |
| 8  | -1.180368 | 1.355822  | 2.993332  |
| 14 | -1.473675 | 0.480443  | 4.445488  |
| 1  | -2.899797 | 0.388475  | 4.650653  |
| 1  | -0.812183 | 1.159175  | 5.535987  |
| 8  | -0.803866 | -1.078304 | 4.248061  |
| 14 | -0.249589 | -2.696610 | 4.171335  |
| 1  | -1.373252 | -3.601586 | 4.233730  |
| 1  | 0.686607  | -2.926968 | 5.247543  |
| 8  | 0.565450  | -2.900984 | 2.676088  |
| 8  | 5.130737  | -0.892941 | -0.397444 |
| 14 | 6.286153  | 0.378000  | -0.493617 |
| 1  | 6.731757  | 0.518536  | -1.860808 |
| 1  | 7.379530  | 0.040663  | 0.390072  |
| 8  | 5.578299  | 1.841375  | 0.041527  |
| 14 | 5.055396  | 3.407151  | 0.493391  |
| 1  | 5.268512  | 3.588331  | 1.911411  |

|   |          |          |           |
|---|----------|----------|-----------|
| 1 | 5.771762 | 4.394018 | -0.282660 |
| 8 | 3.378457 | 3.572221 | 0.155290  |
| 8 | 0.921057 | 2.540172 | 1.319898  |

E + ZPE = -1751.249260 a.u.  
 H(298K) = -1751.197449 a.u.  
 G(298K) = -1751.336106 a.u.

### In Figure 15

#### RC-Iso(12T)

| Atomic Number | Coordinates (Angstroms) |           |           |
|---------------|-------------------------|-----------|-----------|
|               | X                       | Y         | Z         |
| 8             | 1.308137                | 0.645279  | -0.579319 |
| 14            | 0.195982                | 1.809488  | -0.100552 |
| 13            | 0.534650                | -1.058861 | -0.566801 |
| 1             | 2.334684                | 0.695034  | -0.637042 |
| 8             | 3.797721                | 0.475694  | -0.568857 |
| 6             | 4.508164                | 0.733278  | 0.640812  |
| 6             | 5.950342                | 1.098363  | 0.274494  |
| 6             | 6.536948                | -0.020806 | -0.570544 |
| 6             | 5.687459                | -0.344437 | -1.789777 |
| 6             | 4.266252                | -0.677815 | -1.357094 |
| 6             | 3.739267                | 1.860853  | 1.316697  |
| 8             | 4.507476                | 2.317726  | 2.422391  |
| 1             | 4.009952                | 2.984159  | 2.906591  |
| 1             | 3.584563                | 2.666985  | 0.586642  |
| 1             | 2.759856                | 1.491951  | 1.648860  |
| 1             | 4.512309                | -0.162186 | 1.280521  |
| 1             | 5.941604                | 2.031758  | -0.312362 |
| 8             | 6.798374                | 1.211796  | 1.397946  |
| 1             | 6.389974                | 1.821316  | 2.028985  |
| 1             | 6.585852                | -0.923371 | 0.061967  |
| 8             | 7.830408                | 0.306420  | -1.037272 |
| 1             | 8.367946                | 0.541051  | -0.269222 |
| 1             | 5.635622                | 0.531880  | -2.454041 |
| 8             | 3.436305                | -0.816891 | -2.411797 |
| 1             | 4.252438                | -1.548375 | -0.680843 |
| 1             | 2.686536                | -1.458461 | -2.183388 |
| 8             | 6.211712                | -1.463586 | -2.460797 |
| 1             | 7.155197                | -1.300620 | -2.590383 |
| 8             | -0.989517               | -0.800894 | -1.350208 |
| 8             | 0.339956                | -1.748497 | 1.008910  |
| 8             | 1.508836                | -2.206072 | -1.533961 |
| 8             | 0.830641                | 3.226139  | 0.437309  |
| 8             | -0.846756               | 2.111223  | -1.304078 |
| 8             | -0.538944               | 1.057460  | 1.145583  |
| 14            | -1.952533               | 1.703042  | 1.959929  |
| 14            | -2.389889               | 2.879904  | -0.953129 |
| 14            | -0.396157               | 4.352918  | 1.071697  |
| 14            | -2.025367               | -2.177440 | -1.551997 |
| 14            | -0.644884               | -3.178013 | 1.088010  |
| 14            | 0.698918                | -3.770343 | -1.696695 |
| 8             | -0.883709               | -3.289801 | -2.257651 |
| 8             | 0.263338                | -4.143598 | -0.044029 |
| 8             | -2.011191               | -2.810584 | 0.069903  |
| 1             | 1.394827                | -4.779958 | -2.436286 |
| 8             | -2.855093               | 2.107972  | 0.532675  |
| 8             | -1.562213               | 4.228041  | -0.213765 |



```

8      -1.187792  3.260966  2.171517
1      0.041435  5.632999  1.530485
8      -2.674570  0.856336  3.207759
14     -3.357672  -0.344379  4.243444
8      -2.371202  -1.732211  4.263407
14     -1.474777  -3.197952  4.290143
8      -1.048308  -3.601396  2.679982
8      -3.525666  2.906636  -2.185299
14     -4.442342  2.211023  -3.476876
8      -4.675149  0.561211  -3.116353
14     -4.955450  -1.107286  -2.826293
8      -3.517355  -1.847802  -2.274547
1      -0.294587  -3.013922  5.104155
1      -2.319097  -4.243358  4.824750
1      -4.678970  -0.664434  3.754840
1      -3.403310  0.226074  5.571308
1      -5.355854  -1.721671  -4.072434
1      -5.987308  -1.232608  -1.821395
1      -5.718229  2.890151  -3.507028
1      -3.721613  2.378206  -4.716939
    
```

-----  
 E + ZPE = -1751.238512 a.u.  
 H(298K) = -1751.188502 a.u.  
 G(298K) = -1751.321484 a.u.

### TS-Iso(12T)

```

-----
Atomic      Coordinates (Angstroms)
Number      X          Y          Z
-----
8          1.404348  0.650864  -0.461060
14         0.271584  1.754318  0.028326
13         0.564859  -0.982441  -0.565378
1          2.698643  0.739551  -0.665997
8          3.809300  0.707876  -0.780295
6          4.482453  1.208402  0.387665
6          5.992556  1.098001  0.161083
6          6.374645  -0.308352  -0.258477
6          5.651900  -0.753936  -1.516567
6          4.149278  -0.814353  -1.288403
6          4.035645  2.658336  0.533049
8          4.795849  3.243557  1.585329
1          4.399093  4.081492  1.841904
1          4.230215  3.170845  -0.418772
1          2.966127  2.711838  0.753318
1          4.197968  0.619861  1.271287
1          6.284038  1.798810  -0.638742
8          6.725822  1.346620  1.342188
1          6.453658  2.203714  1.700450
1          6.111136  -0.995860  0.562966
8          7.759756  -0.391572  -0.527322
1          8.228152  -0.042786  0.242848
1          5.844518  -0.050109  -2.339984
8          3.427633  -1.023251  -2.338111
1          3.884737  -1.399254  -0.388264
1          2.462268  -1.653421  -2.085786
8          6.045987  -2.061135  -1.859131
1          7.010590  -2.090073  -1.800419
8          -0.967905  -0.736139  -1.342562
8          0.395886  -1.831238  0.934248
8          1.472397  -2.167243  -1.656072
8          0.829128  3.173930  0.678761
    
```

```

8      -0.760192  2.160541  -1.170337
8      -0.545432  0.973936  1.221823
14     -1.986368  1.578889  2.015696
14     -2.312978  2.909468  -0.827632
14     -0.427441  4.253551  1.335698
14     -2.059262  -2.054455  -1.587985
14     -0.645881  -3.216059  0.977430
14     0.608520  -3.719057  -1.867111
8      -0.950297  -3.155424  -2.374538
8      0.225574  -4.139954  -0.226188
8      -2.016106  -2.779933  -0.006366
1      1.286179  -4.688173  -2.672592
8      -2.855626  2.051807  0.586198
8      -1.561182  4.245277  0.011256
8      -1.274417  3.136107  2.370601
1      0.010024  5.503928  1.874336
8      -2.746440  0.650798  3.185212
14     -3.454322  -0.590677  4.146214
8      -2.437421  -1.959650  4.170988
14     -1.499892  -3.396078  4.165617
8      -1.044733  -3.723252  2.542830
8      -3.408304  3.008443  -2.097319
14     -4.305844  2.394246  -3.436803
8      -4.638222  0.750285  -3.120962
14     -4.982758  -0.896632  -2.799561
8      -3.551988  -1.678326  -2.277766
1      -0.331348  -3.212540  4.995934
1      -2.314754  -4.490070  4.645818
1      -4.741813  -0.931722  3.586198
1      -3.580194  -0.076247  5.491731
1      -5.434551  -1.518208  -4.024369
1      -5.988407  -0.979330  -1.764610
1      -5.546028  3.134072  -3.507790
1      -3.534588  2.538227  -4.649323
    
```

-----  
 E + ZPE = -1751.235234 a.u.  
 H(298K) = -1751.184968 a.u.  
 G(298K) = -1751.319687 a.u.

### PC-Iso(12T)

```

-----
Atomic      Coordinates (Angstroms)
Number      X          Y          Z
-----
8          0.678398  0.507502  -2.058701
14         -0.105975  1.633408  -1.181562
13         0.261297  -1.113047  -1.483834
1          2.426439  1.114699  -2.401905
8          3.305964  1.530632  -2.344116
6          3.503701  2.084460  -1.061259
6          4.526235  1.258405  -0.266144
6          4.117707  -0.220927  -0.289664
6          4.665802  -0.944094  -1.558325
6          3.601114  -1.884462  -2.061733
6          3.953194  3.519706  -1.291895
8          4.278202  4.112557  -0.032508
1          4.650013  4.988979  -0.169572
1          4.830348  3.506565  -1.952294
1          3.138144  4.059946  -1.784543
1          2.578147  2.085065  -0.468864
1          5.536055  1.373854  -0.695021
8          4.531317  1.637635  1.100764
    
```

|    |           |           |           |
|----|-----------|-----------|-----------|
| 1  | 4.580113  | 2.604245  | 1.144757  |
| 1  | 3.018714  | -0.285998 | -0.254640 |
| 8  | 4.644834  | -0.916365 | 0.825807  |
| 1  | 4.676501  | -0.285007 | 1.560186  |
| 1  | 4.851582  | -0.209945 | -2.345107 |
| 8  | 2.871896  | -1.606537 | -2.998109 |
| 1  | 3.503993  | -2.845775 | -1.522803 |
| 1  | 1.366788  | -2.564399 | -3.081785 |
| 8  | 5.842060  | -1.663938 | -1.287834 |
| 1  | 5.899578  | -1.749520 | -0.321867 |
| 8  | -1.453470 | -1.253556 | -1.277574 |
| 8  | 1.124989  | -1.666299 | -0.076091 |
| 8  | 0.542145  | -2.705096 | -2.587472 |
| 8  | 0.454917  | 3.192619  | -1.275956 |
| 8  | -1.721911 | 1.711344  | -1.483669 |
| 8  | 0.091840  | 1.177790  | 0.406602  |
| 14 | -0.662841 | 1.984260  | 1.767306  |
| 14 | -2.838079 | 2.561729  | -0.429406 |
| 14 | -0.293608 | 4.411355  | -0.223686 |
| 14 | -2.353876 | -2.472117 | -0.469365 |
| 14 | 0.468314  | -2.936015 | 0.904543  |
| 14 | -0.188228 | -4.237831 | -1.905057 |
| 8  | -1.789936 | -3.771888 | -1.519383 |
| 8  | 0.569809  | -4.160237 | -0.360772 |
| 8  | -1.264095 | -2.772335 | 0.850881  |
| 1  | 0.047651  | -5.354337 | -2.764902 |
| 8  | -2.287885 | 2.060476  | 1.144963  |
| 8  | -1.985985 | 4.081627  | -0.511724 |
| 8  | -0.165759 | 3.595427  | 1.315551  |
| 1  | 0.167747  | 5.760899  | -0.328103 |
| 8  | -0.419048 | 1.350738  | 3.303200  |
| 14 | -0.202972 | 0.358690  | 4.688887  |
| 8  | 0.735922  | -1.008856 | 4.279890  |
| 14 | 1.681158  | -2.396021 | 3.941578  |
| 8  | 1.119081  | -3.059133 | 2.456000  |
| 8  | -4.475541 | 2.340102  | -0.752017 |
| 14 | -5.880695 | 1.452997  | -1.196059 |
| 8  | -5.723630 | -0.115493 | -0.531941 |
| 14 | -5.566324 | -1.665494 | 0.168516  |
| 8  | -3.993168 | -2.265192 | -0.169084 |
| 1  | 3.075667  | -2.032633 | 3.843660  |
| 1  | 1.465109  | -3.380734 | 4.978537  |
| 1  | -1.499065 | -0.068189 | 5.165224  |
| 1  | 0.500590  | 1.130069  | 5.688915  |
| 1  | -6.531546 | -2.555436 | -0.436660 |
| 1  | -5.746121 | -1.581463 | 1.599656  |
| 1  | -7.029038 | 2.105724  | -0.608437 |
| 1  | -5.994609 | 1.376864  | -2.633870 |

-----  
E + ZPE = -1751.245473 a.u.  
H(298K) = -1751.193175 a.u.  
G(298K) = -1751.333404 a.u.

## **In the supporting information**

### **In Figure 3S**

#### **RC-1-BP-1W**

-----  
C 1.605318 -0.821294 -0.066769

|   |           |           |           |
|---|-----------|-----------|-----------|
| C | 1.673569  | 0.685785  | -0.264605 |
| C | 0.426116  | 1.306656  | 0.340493  |
| C | -0.801042 | 0.797641  | -0.421394 |
| O | -0.582553 | -0.360784 | -1.150762 |
| C | 0.259776  | -1.386212 | -0.584466 |
| O | 2.783982  | 1.244898  | 0.407662  |
| O | 0.415646  | 2.713972  | 0.234974  |
| O | -1.883472 | 0.607226  | 0.531391  |
| C | -0.490928 | -2.208421 | 0.446885  |
| O | -0.802068 | -1.362529 | 1.568239  |
| O | 2.710665  | -1.376245 | -0.760845 |
| H | 3.591346  | 0.893642  | 0.006637  |
| H | 1.720990  | 0.914303  | -1.338989 |
| H | 0.365664  | 1.004907  | 1.395757  |
| H | -1.619164 | -0.209202 | 1.115612  |
| H | -1.157260 | 1.554829  | -1.120009 |
| H | 1.167293  | 3.057146  | 0.739121  |
| H | 0.477702  | -2.042215 | -1.430103 |
| H | 2.916810  | -2.245829 | -0.393131 |
| H | 1.703916  | -1.023888 | 1.007504  |
| H | 0.146792  | -3.031630 | 0.779974  |
| H | -1.413866 | -2.604685 | 0.014050  |
| H | -1.189048 | -1.883305 | 2.287039  |
| H | -2.830707 | 0.470777  | 0.037494  |
| O | -4.001918 | 0.360485  | -0.672130 |
| H | -4.293944 | -0.555417 | -0.793228 |
| H | -4.745637 | 0.839451  | -0.276809 |

-----  
E + ZPE = -763.591254 a.u.  
H(298K) = -763.575304 a.u.  
G(298K) = -763.632643 a.u.

#### **TS-1-BP-1W**

-----  
O -0.565722 0.247012 1.184589  
C 0.503846 1.219936 0.861136  
C 1.489994 0.662845 -0.164661  
C 1.762116 -0.811263 0.096297  
C 0.465387 -1.577048 -0.104255  
C -0.662123 -0.888612 0.642458  
C -0.214484 2.483921 0.419234  
O -0.780731 2.377816 -0.869676  
O 2.712756 1.357637 -0.033494  
O 2.701846 -1.325137 -0.816618  
O 0.590025 -2.871706 0.428282  
O -1.922785 -0.257726 -1.018431  
O -4.394948 -0.433783 -0.001619  
H 3.518890 -0.814379 -0.718615  
H 2.108724 -0.945389 1.132100  
H 0.227247 -1.594772 -1.172931  
H -1.871181 -0.713942 -1.870693  
H -1.494119 -1.492512 0.997661  
H 0.025792 -3.484190 -0.063808  
H 1.005370 1.380389 1.818025  
H 2.733373 2.099812 -0.651902  
H 1.085642 0.776014 -1.177510  
H 0.526974 3.286831 0.384789  
H -0.966764 2.740439 1.174328  
H -1.358523 1.594639 -0.920662  
H -2.857874 -0.354829 -0.701525  
H -5.066346 -0.857276 -0.552874  
H -4.409167 -0.912406 0.838093  
-----



E + ZPE = -763.561363 a.u.  
H(298K) = -763.544140 a.u.  
G(298K) = -763.605143 a.u.

### PC-1-BP-1W

-----  
O 0.536871 0.259029 -1.196404  
C -0.547752 1.223622 -0.866630  
C -1.527771 0.650492 0.157010  
C -1.784711 -0.829329 -0.091775  
C -0.470617 -1.574193 0.077387  
C 0.612069 -0.898202 -0.724903  
C 0.171826 2.481983 -0.410528  
O 0.748942 2.352295 0.869539  
O -2.758623 1.329373 0.023328  
O -2.689804 -1.349732 0.850878  
O -0.588734 -2.894933 -0.383939  
O 2.035492 -0.154424 1.078707  
O 4.508849 -0.444977 -0.045126  
H -3.520132 -0.858299 0.766175  
H -2.158312 -0.974437 -1.116225  
H -0.167301 -1.529933 1.131738  
H 2.010385 -0.523556 1.971540  
H 1.473505 -1.477052 -1.054193  
H -0.054146 -3.484160 0.166116  
H -1.043637 1.385665 -1.825925  
H -2.786927 2.075258 0.637201  
H -1.124559 0.773002 1.168953  
H -0.573842 3.280045 -0.356770  
H 0.915166 2.754611 -1.168793  
H 1.347801 1.580424 0.899773  
H 2.954166 -0.282577 0.749172  
H 5.198689 -0.870083 0.481090  
H 4.466926 -0.948200 -0.869090  
-----

E + ZPE = -763.562285 a.u.  
H(298K) = -763.543940 a.u.  
G(298K) = -763.607530 a.u.

### RC-2-BP-1W

-----  
O 0.342213 -1.446549 0.205559  
C -0.868674 -1.006559 -0.377231  
C -1.151428 0.403640 0.124449  
C 0.000457 1.332402 -0.233549  
C 1.309548 0.753254 0.294350  
C 1.471757 -0.684187 -0.210395  
O -1.891035 -1.846433 0.056871  
O -0.256690 2.645877 0.226234  
O 2.423026 1.498895 -0.166680  
C 2.705051 -1.375010 0.362860  
O 3.902811 -0.877905 -0.210033  
O -2.355069 0.881686 -0.499974  
O -4.219342 -0.414335 0.336084  
H -1.298049 0.366919 1.212194  
H 0.068881 1.411343 -1.325561  
H 1.286957 0.738218 1.394762  
H 1.540994 -0.678199 -1.309678  
H -0.780665 -1.019528 -1.473118

H -1.847525 -2.682775 -0.429703  
H -3.428166 0.247256 -0.070585  
H -0.286252 2.649741 1.195335  
H 2.401793 2.379538 0.232849  
H 2.651360 -2.439335 0.122080  
H 2.710787 -1.263114 1.455467  
H 3.901996 0.085988 -0.105170  
H -2.416770 1.845696 -0.369888  
H -3.838264 -1.315884 0.317814  
H -5.034656 -0.397010 -0.194204  
-----

E + ZPE = -763.592349 a.u.  
H(298K) = -763.576869 a.u.  
G(298K) = -763.632606 a.u.

### TS-2-BP-1W

-----  
O 0.273004 -1.168564 0.327363  
C -0.900550 -1.039180 -0.595592  
C -0.875023 0.172171 0.205109  
C 0.045500 1.310649 -0.176690  
C 1.468316 0.838684 0.193792  
C 1.527158 -0.639894 -0.175161  
O -1.859291 -1.934204 -0.296209  
O -0.314783 2.522442 0.429467  
O 2.480293 1.534598 -0.484978  
C 2.656497 -1.408709 0.499525  
O 3.901447 -1.008670 -0.041960  
O -2.630223 1.228884 -0.588718  
O -4.307506 -0.584090 0.579358  
H -1.378355 0.154898 1.167063  
H -0.004505 1.470887 -1.258018  
H 1.587031 0.934679 1.283215  
H 1.576063 -0.770822 -1.262296  
H -0.572279 -1.005817 -1.633397  
H -1.802255 -2.708000 -0.879049  
H -3.382619 0.739982 -0.188941  
H -0.171591 2.470636 1.386742  
H 2.613405 2.396639 -0.066216  
H 2.543136 -2.474800 0.294271  
H 2.614742 -1.246466 1.583434  
H 3.997471 -0.050107 0.062126  
H -2.597976 2.097135 -0.161606  
H -3.725484 -1.328818 0.362464  
H -5.171690 -0.805533 0.209716  
-----

E + ZPE = -763.529243 a.u.  
H(298K) = -763.512145 a.u.  
G(298K) = -763.571307 a.u.

### PC-2-BP-1W

-----  
O 0.503609 -1.188526 -0.442707  
C -1.739678 -0.454940 -0.869447  
C -0.477852 -0.241220 -0.059647  
C 0.174346 1.115694 -0.324359  
C 1.602787 0.843815 0.133218  
C 1.813714 -0.593014 -0.361601  
O -2.323234 -1.655102 -0.524439  
O -0.506607 2.201246 0.272848  
O 2.578114 1.691149 -0.431231

|   |           |           |           |
|---|-----------|-----------|-----------|
| C | 2.678341  | -1.450880 | 0.550561  |
| O | 4.005339  | -0.952283 | 0.613984  |
| O | -2.683906 | 0.603032  | -0.508473 |
| O | -4.029977 | -0.153276 | 1.336066  |
| H | -0.730501 | -0.342377 | 1.009125  |
| H | 0.186888  | 1.323151  | -1.401343 |
| H | 1.644775  | 0.883534  | 1.233075  |
| H | 2.250681  | -0.558282 | -1.367549 |
| H | -1.556472 | -0.369723 | -1.943544 |
| H | -2.867607 | -1.986051 | -1.253180 |
| H | -3.395210 | 0.241446  | 0.437341  |
| H | -0.459089 | 2.132376  | 1.239381  |
| H | 2.529865  | 2.553841  | 0.002477  |
| H | 2.740824  | -2.463510 | 0.145291  |
| H | 2.220459  | -1.498507 | 1.547250  |
| H | 4.003052  | -0.099971 | 1.070538  |
| H | -2.213389 | 1.439889  | -0.291226 |
| H | -4.068820 | -1.125235 | 1.303809  |
| H | -4.942097 | 0.182776  | 1.327814  |

E + ZPE = -763.583024 a.u.  
H(298K) = -763.566844 a.u.  
G(298K) = -763.625462 a.u.

### RC-3-BP-1W

|   |           |           |           |
|---|-----------|-----------|-----------|
| C | 0.335849  | -1.587654 | 0.299209  |
| C | -0.816787 | -0.687739 | -0.108595 |
| C | -0.474001 | 0.768557  | 0.138665  |
| C | 0.839871  | 1.084291  | -0.595893 |
| O | 1.864193  | 0.204550  | -0.141420 |
| C | 1.606949  | -1.157687 | -0.437040 |
| O | 2.712449  | -1.905815 | -0.061338 |
| O | -0.054168 | -2.905271 | -0.028909 |
| O | -1.532660 | 1.574887  | -0.368078 |
| C | 1.309293  | 2.505833  | -0.372043 |
| O | 1.382270  | 2.747105  | 1.026014  |
| O | -1.975317 | -1.051083 | 0.669786  |
| O | -3.852075 | 0.245253  | -0.130317 |
| H | 0.507679  | -1.486445 | 1.380594  |
| H | -1.048800 | -0.840969 | -1.171826 |
| H | -0.347455 | 0.935691  | 1.214053  |
| H | 0.681125  | 0.943781  | -1.676532 |
| H | 1.484113  | -1.295789 | -1.519921 |
| H | 2.830537  | -1.842953 | 0.899111  |
| H | 0.467153  | -3.534538 | 0.487530  |
| H | -2.062840 | -2.021854 | 0.653589  |
| H | -1.521154 | 2.433376  | 0.078144  |
| H | 0.605135  | 3.193955  | -0.854054 |
| H | 2.290485  | 2.624189  | -0.844832 |
| H | 1.713386  | 3.642554  | 1.168836  |
| H | -3.070540 | -0.441768 | 0.243969  |
| H | -4.367821 | -0.143593 | -0.857379 |
| H | -3.325576 | 1.003755  | -0.473000 |

E + ZPE = -763.594474 a.u.  
H(298K) = -763.578790 a.u.  
G(298K) = -763.635264 a.u.

### TS-3-BP-1W

|   |           |           |           |
|---|-----------|-----------|-----------|
| C | -0.124195 | 1.647425  | 0.457240  |
| C | 0.664343  | 0.628552  | -0.055800 |
| C | 0.320606  | -0.786333 | 0.179169  |
| C | -1.020835 | -1.056694 | -0.606510 |
| O | -1.951514 | -0.033538 | -0.304488 |
| C | -1.550179 | 1.204982  | -0.663418 |
| O | -2.441518 | 2.163762  | -0.373851 |
| O | 0.246161  | 2.926693  | 0.156350  |
| O | 1.314948  | -1.628219 | -0.354919 |
| C | -1.629525 | -2.385905 | -0.216001 |
| O | -1.856799 | -2.379158 | 1.181869  |
| O | 2.661409  | 0.590910  | 1.296851  |
| O | 3.946836  | -0.635924 | -0.833780 |
| H | -0.630672 | 1.494252  | 1.410746  |
| H | 1.352190  | 0.860073  | -0.868598 |
| H | 0.140296  | -0.982452 | 1.239296  |
| H | -0.787073 | -1.056901 | -1.677306 |
| H | -1.170859 | 1.328871  | -1.677636 |
| H | -2.888434 | 1.981056  | 0.471339  |
| H | -0.398206 | 3.546858  | 0.527508  |
| H | 2.864672  | 1.515059  | 1.492377  |
| H | 1.418437  | -2.403068 | 0.214211  |
| H | -0.934059 | -3.180429 | -0.508594 |
| H | -2.564901 | -2.514163 | -0.771481 |
| H | -2.239004 | -3.227796 | 1.438998  |
| H | 3.301533  | 0.311099  | 0.611846  |
| H | 4.129934  | -0.148516 | -1.646731 |
| H | 3.088686  | -1.072317 | -0.968316 |

E + ZPE = -763.535781 a.u.  
H(298K) = -763.517681 a.u.  
G(298K) = -763.579449 a.u.

### PC-3-BP-1W

|   |           |           |           |
|---|-----------|-----------|-----------|
| C | 1.212360  | 1.269719  | 0.717919  |
| C | 0.793511  | 0.374876  | -0.180442 |
| C | -0.200072 | -0.680930 | 0.175782  |
| C | -1.508812 | -0.506503 | -0.620007 |
| O | -2.174466 | 0.662894  | -0.013965 |
| C | -1.972028 | 1.813876  | -0.495969 |
| O | -2.450081 | 2.846013  | 0.072228  |
| O | 2.113659  | 2.230603  | 0.385140  |
| O | 0.339486  | -1.960848 | -0.139861 |
| C | -2.460804 | -1.674140 | -0.504369 |
| O | -2.439427 | -2.130098 | 0.838443  |
| O | 4.248446  | 0.480272  | -0.648395 |
| O | 3.136354  | -1.943740 | 0.272403  |
| H | 0.866010  | 1.274786  | 1.749020  |
| H | 1.162378  | 0.403692  | -1.204944 |
| H | -0.446663 | -0.626197 | 1.242021  |
| H | -1.320190 | -0.278088 | -1.672089 |
| H | -1.412704 | 1.976411  | -1.416472 |
| H | -2.940773 | 2.645945  | 0.897054  |
| H | 2.315102  | 2.786926  | 1.150325  |
| H | 3.654319  | 1.184239  | -0.348849 |
| H | -0.181584 | -2.633293 | 0.327394  |
| H | -2.111694 | -2.451354 | -1.192746 |
| H | -3.463151 | -1.359511 | -0.812211 |
| H | -3.051264 | -2.872339 | 0.926838  |
| H | 3.839139  | -0.350846 | -0.340161 |
| H | 3.538272  | -2.733175 | -0.111305 |

H 2.176103 -2.029348 0.120681

-----  
E + ZPE = -763.566529 a.u.

H(298K) = -763.547566 a.u.

G(298K) = -763.612528 a.u.

### RC-4-BP-1W

-----  
O 0.518188 -1.602559 -0.196301  
C 1.647223 -1.067355 0.482956  
C 1.980428 0.297132 -0.119511  
C 0.774343 1.224902 -0.041541  
C -0.435739 0.548586 -0.661632  
C -0.657928 -0.827913 -0.014397  
O 2.694775 -1.968683 0.367971  
O 3.029408 0.932115 0.583141  
O 1.020395 2.430673 -0.735966  
C -1.787471 -1.642583 -0.630137  
O -3.031753 -1.049921 -0.263841  
O -1.567301 1.420217 -0.464554  
H 2.246972 0.152810 -1.177434  
H 0.556508 1.432596 1.018366  
H -0.285283 0.428102 -1.739743  
H -0.849127 -0.700482 1.063457  
H 1.426381 -0.972997 1.554853  
H 2.981592 -2.018355 -0.557253  
H 3.870593 0.525237 0.336014  
H 1.811379 2.836065 -0.352199  
H -2.147646 1.397194 -1.241764  
H -1.718326 -2.662380 -0.239620  
H -1.681058 -1.664549 -1.720677  
H -3.756651 -1.579231 -0.621149  
H -2.319133 1.244491 0.632270  
O -2.947267 0.928868 1.474095  
H -3.347271 0.085086 1.153880  
H -3.645630 1.574120 1.680217

-----  
E + ZPE = -763.591047 a.u.

H(298K) = -763.575398 a.u.

G(298K) = -763.631437 a.u.

### TS-4-BP-1W

-----  
O -0.480072 -1.596551 0.017206  
C -1.572568 -1.010161 -0.684090  
C -2.119181 0.141894 0.168373  
C -0.991268 1.128598 0.472549  
C 0.307832 0.584580 0.670239  
C 0.647331 -0.763884 0.148964  
O -2.518494 -1.986652 -0.916160  
O -3.107206 0.877321 -0.507185  
O -1.329175 2.201654 1.269556  
C 1.619874 -1.467378 1.108569  
O 2.796269 -0.683930 1.150832  
O 1.547055 1.861768 -1.127416  
H -2.492420 -0.258195 1.119859  
H -0.597642 1.488681 -0.546207  
H 1.072692 1.160052 1.186520  
H 1.159784 -0.613650 -0.817622  
H -1.239563 -0.642795 -1.663626

H -2.898133 -2.286360 -0.075171  
H -3.967694 0.457311 -0.374464  
H -2.138697 2.598754 0.911281  
H 1.771137 2.765372 -0.868658  
H 1.805666 -2.464584 0.699491  
H 1.164492 -1.558293 2.098798  
H 3.321715 -0.931730 1.923566  
H 2.401132 1.404340 -1.284721  
O 3.717536 0.186888 -1.350718  
H 3.657304 -0.197907 -0.457327  
H 4.620809 0.513122 -1.448254

-----  
E + ZPE = -763.526452 a.u.

H(298K) = -763.508409 a.u.

G(298K) = -763.570093 a.u.

### PC-4-BP-1W

-----  
C 0.893934 -0.823510 0.042172  
O -0.215908 -1.700209 -0.083544  
C -1.354748 -1.055204 -0.623542  
C -1.847313 -0.016751 0.408615  
C -0.721403 0.824320 0.916175  
C 0.608034 0.232274 1.126764  
O -2.326132 -1.996237 -0.898862  
O -2.844267 0.837888 -0.070616  
O -0.967081 2.002640 1.306314  
C 2.118154 -1.649741 0.387169  
O 3.203676 -0.729011 0.438265  
O -0.112206 1.645191 -1.353859  
O 2.701149 1.628728 -1.113679  
H -2.169829 -0.577108 1.302822  
H 1.364804 1.017053 1.180865  
H 0.559420 -0.274291 2.103356  
H 1.069591 -0.331765 -0.920493  
H -1.109227 -0.553811 -1.564599  
H -2.604595 -2.442472 -0.083956  
H -3.717031 0.504074 0.178418  
H -1.899817 2.246682 1.096088  
H -0.509131 2.523911 -1.421950  
H 2.273125 -2.400825 -0.393059  
H 1.982579 -2.148231 1.354056  
H 4.036613 -1.214195 0.499351  
H 0.855849 1.788472 -1.316345  
H 3.051405 0.869645 -0.611741  
H 3.122456 2.412605 -0.739082

-----  
E + ZPE = -763.589142 a.u.

H(298K) = -763.571880 a.u.

G(298K) = -763.630868 a.u.

### RC-6-BP-1W

-----  
C -0.520277 -0.767916 0.729879  
O 0.455125 -1.545334 0.044333  
C 1.779608 -1.060763 0.235106  
C 1.901029 0.355965 -0.336604  
C 0.841407 1.259022 0.280094  
C -0.524840 0.624488 0.094381  
O 2.659923 -1.948032 -0.365999

|   |           |           |           |
|---|-----------|-----------|-----------|
| O | 3.161469  | 0.916294  | -0.033382 |
| O | 0.789395  | 2.531101  | -0.338794 |
| O | -1.536466 | 1.439066  | 0.697549  |
| C | -1.844199 | -1.506692 | 0.666456  |
| O | -2.480428 | -1.450423 | -0.619697 |
| O | -3.515083 | 0.774395  | -0.702202 |
| H | 1.741431  | 0.309737  | -1.424630 |
| H | 1.044865  | 1.370308  | 1.355536  |
| H | -0.726875 | 0.531922  | -0.982126 |
| H | -0.251153 | -0.681926 | 1.793800  |
| H | 2.018327  | -1.055673 | 1.307160  |
| H | 2.531546  | -1.929413 | -1.327056 |
| H | 3.839584  | 0.471059  | -0.559633 |
| H | 1.545796  | 3.056099  | -0.043758 |
| H | -1.270768 | 2.369662  | 0.590426  |
| H | -2.552654 | -1.056883 | 1.364588  |
| H | -1.684525 | -2.550685 | 0.944944  |
| H | -1.904902 | -1.788502 | -1.323038 |
| H | -3.177278 | -0.225925 | -0.790267 |
| H | -4.400776 | 0.806700  | -0.302621 |
| H | -2.820460 | 1.212370  | -0.073661 |

E + ZPE = -763.598960 a.u.  
H(298K) = -763.583785 a.u.  
G(298K) = -763.638575 a.u.

### TS-6-BP-1W

|   |           |           |           |
|---|-----------|-----------|-----------|
| C | -0.525509 | -0.692768 | 0.562799  |
| O | 0.390476  | -1.553442 | 0.063392  |
| C | 1.782070  | -1.147267 | 0.198678  |
| C | 1.975725  | 0.252817  | -0.388101 |
| C | 1.017444  | 1.233701  | 0.274998  |
| C | -0.412396 | 0.746877  | 0.098002  |
| O | 2.543939  | -2.110340 | -0.417578 |
| O | 3.283581  | 0.710201  | -0.128732 |
| O | 1.071781  | 2.514403  | -0.313146 |
| O | -1.338183 | 1.538799  | 0.802888  |
| C | -1.703417 | -1.215862 | 1.093851  |
| O | -3.108428 | -1.650247 | -0.560787 |
| O | -3.612431 | 1.021465  | -0.872897 |
| H | 1.772209  | 0.219532  | -1.468400 |
| H | 1.246844  | 1.292394  | 1.349689  |
| H | -0.654877 | 0.729238  | -0.976558 |
| H | -0.546965 | -0.711483 | 1.815358  |
| H | 2.032565  | -1.161165 | 1.264894  |
| H | 2.443710  | -2.049810 | -1.380927 |
| H | 3.900420  | 0.283911  | -0.738969 |
| H | 1.904273  | 2.937904  | -0.062327 |
| H | -1.071540 | 2.467000  | 0.703365  |
| H | -2.457152 | -0.527872 | 1.458396  |
| H | -1.736363 | -2.266332 | 1.359158  |
| H | -2.623881 | -2.019064 | -1.311831 |
| H | -3.356487 | -0.731625 | -0.810448 |
| H | -4.498926 | 1.299291  | -0.609043 |
| H | -3.003219 | 1.406398  | -0.218831 |

E + ZPE = -763.536163 a.u.  
H(298K) = -763.519264 a.u.  
G(298K) = -763.577893 a.u.

### PC-6-BP-1W

|   |           |           |           |
|---|-----------|-----------|-----------|
| C | -0.553068 | 0.719786  | 0.248133  |
| C | -0.600105 | -0.666644 | 0.825063  |
| O | 0.405486  | -1.425731 | 0.770668  |
| C | 1.796168  | -1.023782 | 0.310549  |
| C | 1.775811  | 0.321130  | -0.412034 |
| C | 0.855550  | 1.291383  | 0.317198  |
| C | -1.786670 | -1.161653 | 1.535576  |
| O | 2.282040  | -2.068966 | -0.401368 |
| O | 3.077928  | 0.852774  | -0.396654 |
| O | 0.797453  | 2.540464  | -0.326643 |
| O | -1.518012 | 1.514629  | 0.888267  |
| O | -1.771096 | -1.658876 | -1.358663 |
| O | -3.434517 | 0.604841  | -1.115491 |
| H | 1.413579  | 0.189165  | -1.440557 |
| H | 1.173269  | 1.403593  | 1.363041  |
| H | -0.809761 | 0.580251  | -0.816090 |
| H | -1.770097 | -0.667091 | 2.517577  |
| H | 2.332815  | -0.958460 | 1.257699  |
| H | 1.947804  | -2.056723 | -1.312591 |
| H | 3.573406  | 0.518360  | -1.156619 |
| H | 1.617842  | 3.022689  | -0.151584 |
| H | -1.356951 | 2.433980  | 0.620351  |
| H | -2.700093 | -0.846011 | 1.029987  |
| H | -1.735921 | -2.241335 | 1.662394  |
| H | -1.365313 | -1.741582 | -2.230679 |
| H | -2.446781 | -0.959284 | -1.443976 |
| H | -4.383984 | 0.476411  | -0.994384 |
| H | -3.130188 | 1.091625  | -0.332426 |

E + ZPE = -763.585578 a.u.  
H(298K) = -763.566900 a.u.  
G(298K) = -763.629828 a.u.

### In Figure 4S

### RC-5-BP-1W

|   |           |           |           |
|---|-----------|-----------|-----------|
| C | -0.495559 | 1.327670  | -0.274486 |
| O | -0.935184 | 0.023449  | -0.789555 |
| C | -0.544860 | -1.224047 | -0.122594 |
| C | 0.992461  | -1.281008 | -0.003061 |
| C | 1.638286  | 0.019019  | -0.467926 |
| C | 0.955072  | 1.202311  | 0.201074  |
| C | -1.284232 | -1.408459 | 1.186405  |
| O | -0.828771 | -0.432584 | 2.116996  |
| H | -1.194959 | -0.626504 | 2.990245  |
| H | -1.064707 | -2.419552 | 1.546218  |
| H | -2.363176 | -1.312936 | 1.020629  |
| H | -0.874768 | -1.995123 | -0.822014 |
| O | 1.540455  | -2.315548 | -0.800646 |
| H | 1.484224  | -3.153224 | -0.322244 |
| H | 1.261469  | -1.434049 | 1.048999  |
| H | 1.538416  | 0.103842  | -1.559412 |
| O | 2.999503  | 0.071114  | -0.092473 |
| H | 3.484302  | -0.602121 | -0.589851 |
| H | 0.975675  | 1.056943  | 1.289539  |
| O | 1.574550  | 2.425025  | -0.140884 |
| H | 2.492890  | 2.384912  | 0.162786  |
| H | -0.541142 | 1.971232  | -1.153883 |

|   |           |           |           |
|---|-----------|-----------|-----------|
| O | -1.377852 | 1.810449  | 0.658568  |
| H | -1.295927 | 1.262855  | 1.465636  |
| H | -2.032957 | 0.037906  | -1.131506 |
| O | -3.232429 | 0.093300  | -1.494164 |
| H | -3.526687 | -0.689848 | -1.986453 |
| H | -3.831843 | 0.201106  | -0.737899 |

-----  
E + ZPE = -763.586375 a.u.

H(298K) = -763.570385 a.u.

G(298K) = -763.627206 a.u.

### TS-5-BP-Iso-1-1W

|   |           |           |           |
|---|-----------|-----------|-----------|
| C | -1.277897 | -0.701680 | -0.551817 |
| C | -2.636526 | -0.596427 | 0.049595  |
| O | -2.721791 | -1.104139 | 1.353676  |
| C | -0.200492 | -1.490965 | 0.024279  |
| O | -0.816089 | -2.474091 | -0.849695 |
| C | 1.213378  | -1.165643 | -0.378493 |
| O | 2.006905  | -2.268855 | 0.000822  |
| C | 1.692318  | 0.105494  | 0.327471  |
| O | 3.051523  | 0.235355  | -0.038474 |
| C | 0.919835  | 1.360937  | -0.081162 |
| O | 1.471513  | 2.499464  | 0.520154  |
| O | -0.425540 | 1.189433  | 0.303531  |
| O | -1.843291 | 3.194011  | -0.720333 |
| H | 1.592861  | -0.027581 | 1.415529  |
| H | 1.258549  | -1.011355 | -1.466676 |
| H | -0.306382 | -1.753064 | 1.076605  |
| H | -1.134582 | -0.308154 | -1.554215 |
| H | 1.001738  | 1.526385  | -1.162010 |
| H | 1.410248  | 2.403961  | 1.483901  |
| H | 3.462138  | 0.917986  | 0.509874  |
| H | 2.934188  | -2.018424 | -0.127711 |
| H | -3.323824 | -1.162381 | -0.587987 |
| H | -2.931058 | 0.457368  | -0.022186 |
| H | -2.336203 | -0.467243 | 1.971919  |
| H | -1.374351 | -3.080171 | -0.328553 |
| H | -1.746654 | 3.270926  | -1.679320 |
| H | -1.604140 | 4.061130  | -0.365837 |
| H | -0.952056 | 1.950899  | -0.060009 |

-----  
E + ZPE = -763.535147 a.u.

H(298K) = -763.517741 a.u.

G(298K) = -763.579273 a.u.

### PC-5-BP-Iso-1-1W

|   |           |           |           |
|---|-----------|-----------|-----------|
| C | -1.608506 | -0.044905 | -0.556570 |
| C | -2.759121 | 0.642107  | 0.137215  |
| O | -3.407757 | -0.274000 | 0.996994  |
| C | -0.783477 | -1.023995 | 0.129765  |
| O | -1.881530 | -1.513109 | -0.784632 |
| C | 0.567017  | -1.428904 | -0.383913 |
| O | 0.694348  | -2.809521 | -0.115056 |
| C | 1.687882  | -0.646374 | 0.307281  |
| O | 2.876028  | -1.207914 | -0.213666 |
| C | 1.631558  | 0.857102  | 0.034335  |
| O | 2.832251  | 1.469305  | 0.447265  |
| O | 0.525981  | 1.360686  | 0.718585  |
| O | -0.429438 | 3.455450  | -0.735137 |

|   |           |           |           |
|---|-----------|-----------|-----------|
| H | 1.626608  | -0.804060 | 1.395399  |
| H | 0.619172  | -1.237214 | -1.465271 |
| H | -1.009372 | -1.266118 | 1.165198  |
| H | -1.230367 | 0.396802  | -1.473781 |
| H | 1.563528  | 1.050706  | -1.043711 |
| H | 2.879904  | 1.427095  | 1.415267  |
| H | 3.629203  | -0.728186 | 0.160614  |
| H | 1.611351  | -3.061676 | -0.302602 |
| H | -3.478915 | 0.970603  | -0.614918 |
| H | -2.365555 | 1.515598  | 0.664018  |
| H | -3.093728 | -0.164889 | 1.904938  |
| H | -2.665754 | -1.764027 | -0.236139 |
| H | -0.446002 | 3.220522  | -1.672632 |
| H | 0.054328  | 4.290560  | -0.687483 |
| H | 0.214403  | 2.176918  | 0.267604  |

-----  
E + ZPE = -763.544636 a.u.

H(298K) = -763.527008 a.u.

G(298K) = -763.588863 a.u.

### TS-5-BP-Iso-2-1W

|   |           |           |           |
|---|-----------|-----------|-----------|
| C | 2.067052  | 1.392274  | -0.188746 |
| O | 1.706921  | 2.472769  | 0.329552  |
| C | 1.908626  | 0.037310  | 0.433617  |
| O | 3.252652  | -0.363814 | 0.574491  |
| C | 1.073903  | -0.911247 | -0.482876 |
| O | 1.838889  | -2.092018 | -0.595259 |
| C | -0.302776 | -1.232298 | 0.107954  |
| O | -0.766582 | -2.358074 | -0.621015 |
| C | -1.273587 | -0.060867 | -0.043232 |
| C | -2.544435 | -0.259251 | 0.774878  |
| O | -3.179325 | -1.451575 | 0.318724  |
| O | -0.614480 | 1.116520  | 0.391240  |
| O | -1.951639 | 3.155127  | -0.815267 |
| H | 1.455750  | 0.127432  | 1.424654  |
| H | 0.935895  | -0.462739 | -1.478173 |
| H | -0.183241 | -1.492821 | 1.171525  |
| H | -1.530284 | 0.019923  | -1.109991 |
| H | 2.632703  | 1.488181  | -1.116422 |
| H | 1.149443  | 2.345003  | 1.131249  |
| H | 3.405748  | -1.132265 | -0.002280 |
| H | 1.295810  | -2.754916 | -1.048432 |
| H | -3.201745 | 0.608214  | 0.638858  |
| H | -2.276059 | -0.341516 | 1.835176  |
| H | -3.895664 | -1.684541 | 0.922595  |
| H | -1.689887 | -2.514241 | -0.360191 |
| H | -2.861527 | 3.257348  | -0.506191 |
| H | -2.017186 | 3.022784  | -1.770411 |
| H | -1.083944 | 1.887143  | -0.001278 |

-----  
E + ZPE = -763.547138 a.u.

H(298K) = -763.529719 a.u.

G(298K) = -763.591357 a.u.

### PC-5-BP-Iso-2-1W

|   |           |           |           |
|---|-----------|-----------|-----------|
| C | -3.272183 | -0.847580 | -0.463532 |
| O | -4.549943 | -0.223381 | -0.396261 |
| C | -2.282607 | 0.174575  | 0.069538  |
| O | -2.637449 | 0.569986  | 1.383405  |

|   |           |           |           |
|---|-----------|-----------|-----------|
| C | -0.874158 | -0.407040 | 0.154449  |
| C | 0.121568  | 0.617171  | 0.685433  |
| C | 1.568811  | 0.158796  | 0.895907  |
| C | 2.045849  | 1.264545  | -0.063541 |
| O | 2.735868  | 0.851089  | -1.120789 |
| O | -0.492552 | -0.793363 | -1.154345 |
| O | 0.510079  | 1.541355  | -0.430506 |
| O | 1.759495  | -1.131790 | 0.397674  |
| H | -3.018050 | -1.117296 | -1.492879 |
| H | -3.245968 | -1.744879 | 0.167838  |
| H | -2.279378 | 1.047953  | -0.600989 |
| H | -0.876820 | -1.258823 | 0.846039  |
| H | -0.281414 | 1.235243  | 1.485063  |
| H | 1.952936  | 0.280156  | 1.910962  |
| H | 2.348024  | 2.212708  | 0.376443  |
| H | -5.233909 | -0.880070 | -0.577917 |
| H | 2.727697  | -1.319453 | 0.390114  |
| H | 0.281657  | 1.098905  | -1.285740 |
| H | 0.319980  | -1.321985 | -1.077974 |
| H | -3.587701 | 0.758423  | 1.379317  |
| H | 3.177166  | 1.590618  | -1.567979 |
| O | 4.450266  | -1.241737 | 0.371037  |
| H | 4.923931  | -2.081521 | 0.435114  |
| H | 4.742054  | -0.840047 | -0.458649 |

-----  
E + ZPE = -763.552217 a.u.  
H(298K) = -763.535037 a.u.  
G(298K) = -763.596009 a.u.

### In Figure 5S

#### **RC-1-BP-2W**

|   |           |           |           |
|---|-----------|-----------|-----------|
| C | 1.747081  | -0.956862 | -0.077688 |
| C | 1.923788  | 0.488921  | -0.515807 |
| C | 0.915914  | 1.343734  | 0.232521  |
| C | -0.503878 | 0.944442  | -0.184479 |
| O | -0.559572 | -0.344980 | -0.748282 |
| C | 0.267154  | -1.392760 | -0.200762 |
| O | 3.210308  | 0.976371  | -0.186776 |
| O | 1.053824  | 2.718284  | -0.065200 |
| O | -1.408105 | 1.088014  | 0.900282  |
| C | -0.312854 | -1.949401 | 1.085593  |
| O | -0.225988 | -0.951961 | 2.106003  |
| O | 2.599561  | -1.743889 | -0.895077 |
| H | 3.865272  | 0.479139  | -0.696174 |
| H | 1.750686  | 0.570066  | -1.598617 |
| H | 1.045641  | 1.174993  | 1.311220  |
| H | -1.137092 | 0.440192  | 1.597311  |
| H | -0.858684 | 1.622427  | -0.963497 |
| H | 1.942262  | 2.993566  | 0.202769  |
| H | 0.214998  | -2.183470 | -0.953288 |
| H | 2.786609  | -2.580304 | -0.448805 |
| H | 2.069023  | -1.030578 | 0.969006  |
| H | 0.266549  | -2.833094 | 1.372569  |
| H | -1.357447 | -2.236199 | 0.921392  |
| H | -0.509489 | -1.328508 | 2.950168  |
| H | -2.794260 | 0.965882  | 0.522079  |
| O | -3.754972 | 0.767817  | 0.148133  |
| H | -4.176013 | 1.588583  | -0.154429 |
| H | -3.612419 | 0.092421  | -0.667082 |

|   |           |           |           |
|---|-----------|-----------|-----------|
| O | -3.164048 | -0.771870 | -1.669247 |
| H | -3.526585 | -1.667831 | -1.615124 |
| H | -2.200362 | -0.838013 | -1.504448 |

-----  
E + ZPE = -839.989581 a.u.  
H(298K) = -839.971771 a.u.  
G(298K) = -840.033088 a.u.

#### **TS-1-BP-2W**

|   |           |           |           |
|---|-----------|-----------|-----------|
| C | -0.440946 | 1.358066  | 0.637970  |
| O | 0.116385  | 0.390774  | 1.219664  |
| C | -0.194314 | -1.029425 | 0.928688  |
| C | -1.285415 | -1.171608 | -0.133954 |
| C | -2.358480 | -0.108611 | 0.055388  |
| C | -1.723945 | 1.255193  | -0.160009 |
| C | 1.131964  | -1.674984 | 0.569561  |
| O | 1.586206  | -1.359810 | -0.736413 |
| O | -1.895080 | -2.435184 | 0.020212  |
| O | -3.389128 | -0.251542 | -0.891226 |
| O | -2.587347 | 2.261102  | 0.306676  |
| O | 1.029655  | 1.397935  | -1.040446 |
| O | 3.292369  | 1.756199  | 0.266922  |
| O | 4.311115  | -0.723820 | -0.369428 |
| H | -3.780472 | -1.129525 | -0.771744 |
| H | -2.756823 | -0.166134 | 1.079434  |
| H | -1.481888 | 1.377557  | -1.221942 |
| H | 0.905241  | 1.891277  | -1.863018 |
| H | -0.090951 | 2.340297  | 0.948951  |
| H | -2.468966 | 3.065699  | -0.217025 |
| H | -0.551149 | -1.416799 | 1.885440  |
| H | -1.471223 | -3.073543 | -0.568215 |
| H | -0.859709 | -1.068431 | -1.139345 |
| H | 0.992196  | -2.758108 | 0.611301  |
| H | 1.873490  | -1.390120 | 1.326160  |
| H | 1.447884  | -0.411751 | -0.936823 |
| H | 1.889914  | 1.693612  | -0.634497 |
| H | 3.900121  | 2.472305  | 0.042718  |
| H | 3.771225  | 0.917245  | 0.086304  |
| H | 4.732095  | -1.232694 | 0.334855  |
| H | 3.462436  | -1.167913 | -0.556098 |

-----  
E + ZPE = -839.955909 a.u.  
H(298K) = -839.936217 a.u.  
G(298K) = -840.002466 a.u.

#### **PC-1-BP-2W**

|   |           |           |           |
|---|-----------|-----------|-----------|
| C | -0.527739 | 1.360754  | 0.738090  |
| O | 0.061227  | 0.386116  | 1.256106  |
| C | -0.246056 | -1.035936 | 0.943535  |
| C | -1.329857 | -1.166185 | -0.128170 |
| C | -2.402199 | -0.097381 | 0.039320  |
| C | -1.745858 | 1.262609  | -0.139647 |
| C | 1.086810  | -1.662047 | 0.575756  |
| O | 1.542187  | -1.299450 | -0.715495 |
| O | -1.948596 | -2.426078 | 0.017971  |
| O | -3.395645 | -0.220620 | -0.947708 |
| O | -2.628513 | 2.291411  | 0.221052  |
| O | 1.179885  | 1.455481  | -1.011815 |
| O | 3.514319  | 1.701033  | 0.308398  |



|   |           |           |           |
|---|-----------|-----------|-----------|
| O | 4.307561  | -0.836855 | -0.437200 |
| H | -3.801795 | -1.094770 | -0.852437 |
| H | -2.838089 | -0.164019 | 1.046993  |
| H | -1.397182 | 1.359232  | -1.177344 |
| H | 1.152634  | 1.834261  | -1.900299 |
| H | -0.175048 | 2.338603  | 1.063422  |
| H | -2.488291 | 3.059161  | -0.350411 |
| H | -0.602239 | -1.432641 | 1.896563  |
| H | -1.523015 | -3.065787 | -0.567823 |
| H | -0.888937 | -1.065488 | -1.126930 |
| H | 0.950271  | -2.746537 | 0.581803  |
| H | 1.821655  | -1.399410 | 1.346565  |
| H | 1.444010  | -0.333624 | -0.865282 |
| H | 2.041193  | 1.722304  | -0.607552 |
| H | 4.162345  | 2.378911  | 0.079376  |
| H | 3.925969  | 0.837612  | 0.087253  |
| H | 4.728487  | -1.396099 | 0.227670  |
| H | 3.418035  | -1.210907 | -0.585338 |

-----  
E + ZPE = -839.955944 a.u.  
H(298K) = -839.935435 a.u.  
G(298K) = -840.003525 a.u.

### RC-2-BP-2W

|   |           |           |           |
|---|-----------|-----------|-----------|
| O | 0.553763  | 1.353890  | -0.628377 |
| C | -0.709637 | 0.767642  | -0.388362 |
| C | -0.652147 | -0.707316 | -0.797327 |
| C | 0.433500  | -1.417862 | 0.000631  |
| C | 1.752934  | -0.678093 | -0.167730 |
| C | 1.581784  | 0.799213  | 0.188130  |
| O | -1.673970 | 1.491364  | -1.085062 |
| O | 0.630799  | -2.743678 | -0.450584 |
| O | 2.753742  | -1.218077 | 0.679537  |
| C | 2.842404  | 1.617785  | -0.070236 |
| O | 3.854530  | 1.340500  | 0.882948  |
| O | -1.891633 | -1.370105 | -0.539726 |
| O | -3.339218 | -0.657616 | 1.424851  |
| O | -3.849835 | 1.588426  | 0.628626  |
| H | -0.424244 | -0.776387 | -1.868132 |
| H | 0.155867  | -1.414231 | 1.065647  |
| H | 2.065989  | -0.751388 | -1.220258 |
| H | 1.305320  | 0.889123  | 1.250778  |
| H | -0.965751 | 0.864820  | 0.676890  |
| H | -1.580359 | 1.362159  | -2.042131 |
| H | -2.745773 | -1.032757 | 0.678173  |
| H | -0.119688 | -3.285813 | -0.172122 |
| H | 2.912561  | -2.136460 | 0.419091  |
| H | 2.595173  | 2.677968  | 0.022481  |
| H | 3.197435  | 1.429129  | -1.092614 |
| H | 3.998446  | 0.381587  | 0.890433  |
| H | -2.455563 | -1.335681 | -1.327055 |
| H | -3.645503 | 0.338636  | 1.102907  |
| H | -4.108333 | -1.236186 | 1.551867  |
| H | -4.748449 | 1.736845  | 0.299098  |
| H | -3.235581 | 1.722795  | -0.123386 |

-----  
E + ZPE = -839.992729 a.u.  
H(298K) = -839.974705 a.u.  
G(298K) = -840.036335 a.u.

### TS-2-BP-2W

|   |           |           |           |
|---|-----------|-----------|-----------|
| O | -0.615283 | -0.988719 | -0.910601 |
| C | 0.804010  | -0.826202 | -0.479836 |
| C | 0.381651  | 0.490084  | -0.943212 |
| C | -0.397806 | 1.382937  | -0.007533 |
| C | -1.810900 | 0.777254  | 0.067068  |
| C | -1.617664 | -0.736216 | 0.108130  |
| O | 1.652991  | -1.603611 | -1.176503 |
| O | -0.485877 | 2.693194  | -0.492334 |
| O | -2.534442 | 1.183708  | 1.199353  |
| C | -2.863149 | -1.533510 | -0.258402 |
| O | -3.823609 | -1.426959 | 0.776100  |
| O | 2.138014  | 1.763174  | -0.687624 |
| O | 3.192129  | 0.675042  | 1.488068  |
| O | 3.631696  | -1.977944 | 0.898892  |
| H | 0.441089  | 0.724054  | -2.001646 |
| H | 0.055362  | 1.347262  | 0.992315  |
| H | -2.337715 | 1.048069  | -0.858728 |
| H | -1.239629 | -1.057612 | 1.085350  |
| H | 0.905495  | -0.995706 | 0.591118  |
| H | 1.752119  | -1.315298 | -2.098414 |
| H | 2.625313  | 1.396029  | 0.097965  |
| H | 0.415286  | 3.053355  | -0.512189 |
| H | -2.888137 | 2.071986  | 1.051992  |
| H | -2.604097 | -2.590007 | -0.349240 |
| H | -3.259046 | -1.178071 | -1.217650 |
| H | -4.003696 | -0.489966 | 0.944694  |
| H | 2.725312  | 1.679137  | -1.451152 |
| H | 3.435579  | -0.262570 | 1.326272  |
| H | 3.973988  | 1.099631  | 1.863436  |
| H | 4.542009  | -2.293514 | 0.833926  |
| H | 3.238972  | -2.105962 | 0.021836  |

-----  
E + ZPE = -839.923006 a.u.  
H(298K) = -839.903046 a.u.  
G(298K) = -839.969422 a.u.

### PC-2-BP-2W

|   |           |           |           |
|---|-----------|-----------|-----------|
| O | -0.826838 | -1.051996 | -0.577575 |
| C | 1.355913  | -0.119023 | -0.176880 |
| C | -0.034695 | 0.125348  | -0.742130 |
| C | -0.775049 | 1.262734  | -0.015170 |
| C | -2.201602 | 0.735082  | 0.004289  |
| C | -1.974411 | -0.755695 | 0.221484  |
| O | 2.004102  | -1.200374 | -0.783957 |
| O | -0.709268 | 2.508098  | -0.673002 |
| O | -3.025534 | 1.255508  | 1.026472  |
| C | -3.131653 | -1.633206 | -0.222795 |
| O | -4.262130 | -1.426866 | 0.611683  |
| O | 2.115077  | 1.081311  | -0.280975 |
| O | 4.333276  | 0.750913  | 0.939616  |
| O | 4.369583  | -1.652288 | 0.573531  |
| H | 0.044826  | 0.359535  | -1.814098 |
| H | -0.418277 | 1.352611  | 1.020085  |
| H | -2.655452 | 0.901910  | -0.983824 |
| H | -1.759188 | -0.937690 | 1.285386  |
| H | 1.309024  | -0.347361 | 0.890412  |
| H | 1.951176  | -1.136485 | -1.750621 |
| H | 3.480829  | 1.002168  | 0.436305  |
| H | 0.144396  | 2.919239  | -0.481318 |

|   |           |           |           |
|---|-----------|-----------|-----------|
| H | -3.298096 | 2.151300  | 0.785130  |
| H | -2.857436 | -2.687281 | -0.134347 |
| H | -3.366868 | -1.417296 | -1.273511 |
| H | -4.436171 | -0.475159 | 0.667541  |
| H | 2.188813  | 1.361577  | -1.208684 |
| H | 4.462364  | -0.325989 | 0.791115  |
| H | 5.084036  | 1.247523  | 0.575138  |
| H | 5.126990  | -2.027153 | 0.100881  |
| H | 3.581851  | -1.747336 | -0.004714 |

-----  
E + ZPE = -839.983600 a.u.

H(298K) = -839.965476 a.u.

G(298K) = -840.028017 a.u.

### RC-3-BP-2W

|   |           |           |           |
|---|-----------|-----------|-----------|
| C | 0.678252  | -1.628253 | 0.319047  |
| O | 0.200830  | -2.926888 | 0.032826  |
| C | -0.518503 | -0.697092 | 0.252292  |
| C | -0.077963 | 0.734982  | 0.511918  |
| O | -1.152747 | 1.648944  | 0.337519  |
| C | 1.017941  | 1.102866  | -0.495618 |
| C | 1.575525  | 2.491979  | -0.272330 |
| O | 2.038110  | 2.589762  | 1.067446  |
| O | 2.093777  | 0.173993  | -0.389219 |
| C | 1.728535  | -1.161748 | -0.691358 |
| O | 2.873068  | -1.946078 | -0.661445 |
| O | -1.501396 | -1.083907 | 1.222533  |
| O | -3.768959 | -0.532083 | 0.259984  |
| O | -3.112866 | 1.059018  | -1.469553 |
| H | 1.119937  | -1.586818 | 1.326282  |
| H | -0.972231 | -0.765155 | -0.748426 |
| H | 0.322454  | 0.817739  | 1.528434  |
| H | 0.594219  | 1.064489  | -1.512045 |
| H | 1.328137  | -1.225557 | -1.712319 |
| H | 3.239378  | -1.946006 | 0.236559  |
| H | 0.866778  | -3.577277 | 0.294347  |
| H | -1.445446 | -2.049171 | 1.336705  |
| H | -1.651888 | 1.720479  | 1.163136  |
| H | 0.783379  | 3.222245  | -0.468003 |
| H | 2.393433  | 2.655522  | -0.983266 |
| H | 2.378794  | 3.481467  | 1.211404  |
| H | -2.872483 | -0.798576 | 0.704397  |
| H | -4.209562 | -1.329085 | -0.076807 |
| H | -3.562033 | 0.163405  | -0.549274 |
| H | -3.746066 | 1.759548  | -1.683597 |
| H | -2.348071 | 1.474259  | -1.011947 |

-----  
E + ZPE = -839.994310 a.u.

H(298K) = -839.976380 a.u.

G(298K) = -840.037972 a.u.

### TS-3-BP-2W

|   |           |           |           |
|---|-----------|-----------|-----------|
| C | -0.226272 | 1.724171  | 0.552370  |
| O | 0.393897  | 2.900962  | 0.236529  |
| C | 0.467695  | 0.551310  | 0.268717  |
| C | -0.154457 | -0.764565 | 0.540269  |
| O | 0.740173  | -1.831983 | 0.351073  |
| C | -1.290590 | -0.930402 | -0.521232 |
| C | -2.159332 | -2.134133 | -0.228445 |

|   |           |           |           |
|---|-----------|-----------|-----------|
| O | -2.693760 | -1.997556 | 1.075703  |
| O | -2.098252 | 0.233533  | -0.480980 |
| C | -1.441337 | 1.382097  | -0.784867 |
| O | -2.234548 | 2.467468  | -0.735057 |
| O | 2.173821  | 0.086160  | 1.776425  |
| O | 4.111946  | 0.037825  | -0.124981 |
| O | 2.407541  | -1.266802 | -1.885668 |
| H | -0.901677 | 1.742828  | 1.408747  |
| H | 1.283937  | 0.595588  | -0.451446 |
| H | -0.613084 | -0.790269 | 1.533974  |
| H | -0.830015 | -1.044803 | -1.510222 |
| H | -0.864798 | 1.382556  | -1.711261 |
| H | -2.849196 | 2.410580  | 0.016856  |
| H | -0.205493 | 3.640405  | 0.415279  |
| H | 2.212044  | 0.792991  | 2.434417  |
| H | 1.407969  | -1.764939 | 1.053872  |
| H | -1.536507 | -3.030620 | -0.316874 |
| H | -2.952531 | -2.176331 | -0.982821 |
| H | -3.263675 | -2.755744 | 1.256703  |
| H | 2.971318  | 0.177551  | 1.203846  |
| H | 4.389750  | 0.889054  | -0.486060 |
| H | 3.609586  | -0.410778 | -0.837507 |
| H | 2.763252  | -1.974798 | -2.437515 |
| H | 1.798341  | -1.690988 | -1.255187 |

-----  
E + ZPE = -839.929918 a.u.

H(298K) = -839.909537 a.u.

G(298K) = -839.977016 a.u.

### PC-3-BP-2W

|   |           |           |           |
|---|-----------|-----------|-----------|
| C | 0.596848  | 1.833695  | 0.909320  |
| O | 1.190637  | 2.997476  | 0.550483  |
| C | 0.463297  | 0.823270  | 0.044521  |
| C | -0.170590 | -0.476284 | 0.437808  |
| O | 0.706340  | -1.581791 | 0.260075  |
| C | -1.381078 | -0.798942 | -0.450321 |
| C | -2.049139 | -2.121306 | -0.159896 |
| O | -2.320889 | -2.188084 | 1.228375  |
| O | -2.384658 | 0.239652  | -0.163142 |
| C | -2.355768 | 1.331462  | -0.800140 |
| O | -3.145159 | 2.278532  | -0.486329 |
| O | 2.987343  | -0.958929 | 1.584034  |
| O | 3.809786  | 0.379408  | -0.678499 |
| O | 2.018203  | -1.138261 | -2.167328 |
| H | 0.243738  | 1.771793  | 1.937159  |
| H | 0.844709  | 0.918202  | -0.972000 |
| H | -0.515772 | -0.426027 | 1.478414  |
| H | -1.118479 | -0.736781 | -1.511187 |
| H | -1.695681 | 1.503531  | -1.648222 |
| H | -3.715504 | 2.068752  | 0.283403  |
| H | 1.210282  | 3.609337  | 1.298006  |
| H | 2.823800  | -0.369483 | 2.331540  |
| H | 1.506834  | -1.418757 | 0.816559  |
| H | -1.359747 | -2.910877 | -0.476082 |
| H | -2.968171 | -2.193480 | -0.751890 |
| H | -2.781677 | -3.015697 | 1.415243  |
| H | 3.361424  | -0.397320 | 0.868914  |
| H | 3.517773  | 1.300235  | -0.685434 |
| H | 3.216063  | -0.093727 | -1.299895 |
| H | 2.407529  | -1.913083 | -2.592205 |
| H | 1.508630  | -1.472015 | -1.401427 |



E + ZPE = -839.962111 a.u.  
H(298K) = -839.940357 a.u.  
G(298K) = -840.012069 a.u.

### RC-4-BP-2W

-----  
C -0.366122 -0.903461 -0.155207  
O 0.827279 -1.662098 -0.039230  
C 1.843577 -1.001520 0.700746  
C 2.254119 0.260592 -0.055790  
C 1.047526 1.167684 -0.257625  
C -0.084561 0.400777 -0.919253  
O 2.900851 -1.883009 0.873346  
O 3.208683 1.012283 0.666827  
O 1.372759 2.276264 -1.073221  
C -1.345010 -1.819700 -0.876191  
O -2.581636 -1.117211 -1.033679  
O -1.232285 1.257418 -0.925379  
O -2.255564 1.772611 1.327232  
H 2.652014 -0.038633 -1.037275  
H 0.708415 1.512114 0.733029  
H 0.188778 0.166596 -1.956560  
H -0.753157 -0.654920 0.846814  
H 1.473369 -0.749116 1.703501  
H 3.301691 -2.074268 0.011220  
H 4.063513 0.562829 0.626007  
H 2.116557 2.738908 -0.661022  
H -1.962747 0.772313 -1.350365  
H -1.492227 -2.727959 -0.284242  
H -0.936554 -2.084367 -1.857060  
H -3.158909 -1.615271 -1.628985  
H -1.783961 1.677352 0.414906  
H -2.924604 0.911688 1.396186  
H -2.752047 2.606663 1.355645  
O -3.601516 -0.256365 1.352564  
H -3.382727 -0.678391 0.487986  
H -4.563150 -0.150914 1.392458  
-----

E + ZPE = -839.995961 a.u.  
H(298K) = -839.978190 a.u.  
G(298K) = -840.039038 a.u.

### TS-4-BP-2W

-----  
C -0.258883 -0.966438 -0.208168  
O 0.936709 -1.725972 -0.045379  
C 1.930526 -1.003933 0.649684  
C 2.226490 0.268246 -0.143232  
C 0.690246 1.350421 -0.165597  
C 0.149460 0.316100 -0.905594  
O 3.059867 -1.791148 0.760942  
O 3.060839 1.105457 0.514850  
O 1.030935 2.490468 -0.803901  
C -1.199478 -1.862116 -1.005389  
O -2.532621 -1.386095 -0.851527  
O -1.996666 1.276337 -1.382488  
O -2.000295 1.940428 1.309287  
H 2.523731 0.068010 -1.175412  
H 0.483895 1.421163 0.901755  
H 0.261125 0.321911 -1.987350  
-----

H -0.696379 -0.737133 0.773724  
H 1.601025 -0.758878 1.666682  
H 3.395354 -2.016850 -0.121347  
H 3.601111 1.614971 -0.108225  
H 1.399474 3.128436 -0.174708  
H -2.512846 0.452428 -1.369854  
H -1.104693 -2.869471 -0.590243  
H -0.910426 -1.874959 -2.061430  
H -3.134624 -1.975217 -1.327324  
H -2.092921 1.649297 -0.480908  
H -2.427619 1.111105 1.612727  
H -2.549689 2.661958 1.640488  
O -3.062257 -0.564289 1.802430  
H -3.070244 -0.949962 0.907042  
H -3.968528 -0.621967 2.130442  
-----

E + ZPE = -839.915512 a.u.  
H(298K) = -839.895558 a.u.  
G(298K) = -839.961685 a.u.

### PC-4-BP-2W

-----  
C -0.153508 -1.068499 -0.404303  
O -1.483815 -1.473195 -0.740601  
C -2.411162 -0.433368 -0.446435  
C -1.725528 0.371062 0.657513  
C 0.164513 1.439198 -0.732232  
C -0.243096 0.333780 0.236100  
O -3.635771 -0.982348 -0.095369  
O -2.334205 1.622949 0.859594  
O -0.004850 2.665058 -0.072634  
C 0.402421 -2.130506 0.535647  
O 1.789070 -1.820713 0.791913  
O 2.976227 1.004727 1.578601  
O 1.544050 1.260384 -1.054922  
H -1.820447 -0.209886 1.585570  
H -0.416183 1.419151 -1.660809  
H 0.407154 0.413410 1.113233  
H 0.436087 -1.046796 -1.328995  
H -2.597782 0.180393 -1.335913  
H -3.536877 -1.473845 0.734564  
H -1.714060 2.323567 0.598797  
H -0.003026 3.389512 -0.715611  
H 2.661942 0.091602 1.638150  
H 0.325326 -3.113709 0.066658  
H -0.136122 -2.124150 1.486925  
H 2.202385 -2.531617 1.306518  
H 2.603868 1.339050 0.748569  
H 2.510532 -0.058476 -1.227114  
H 1.784814 1.868538 -1.771914  
O 2.977993 -0.942119 -1.144769  
H 2.531630 -1.423160 -0.285800  
H 3.929325 -0.791513 -1.005069  
-----

E + ZPE = -839.986450 a.u.  
H(298K) = -839.968092 a.u.  
G(298K) = -840.030950 a.u.

### RC-6-BP-2W

|   |           |           |           |
|---|-----------|-----------|-----------|
| O | -0.542643 | 0.510536  | -0.357895 |
| C | 0.507399  | 1.467311  | -0.486072 |
| C | 1.689430  | 1.030537  | 0.378583  |
| C | 2.132877  | -0.364090 | -0.039605 |
| C | 0.960928  | -1.331920 | 0.015700  |
| C | -0.194143 | -0.792322 | -0.825962 |
| O | -0.008942 | 2.704005  | -0.128037 |
| O | 2.795138  | 1.893697  | 0.203196  |
| O | 3.136216  | -0.874875 | 0.820102  |
| O | 1.315790  | -2.596424 | -0.509835 |
| C | -1.434130 | -1.656459 | -0.761478 |
| O | -1.855972 | -1.800957 | 0.607097  |
| H | 1.368988  | 1.009501  | 1.431210  |
| H | 2.508258  | -0.319815 | -1.073683 |
| H | 0.629169  | -1.426194 | 1.059432  |
| H | 0.119397  | -0.736261 | -1.879454 |
| H | 0.810167  | 1.541792  | -1.538604 |
| H | -0.182668 | 2.720525  | 0.826053  |
| H | 2.628839  | 2.724929  | 0.667675  |
| H | 3.941205  | -0.352320 | 0.702048  |
| H | 2.089503  | -2.915266 | -0.023381 |
| H | -1.215935 | -2.638605 | -1.181961 |
| H | -2.239213 | -1.184906 | -1.334012 |
| H | -2.123823 | -2.715115 | 0.777894  |
| H | -2.888759 | -0.868450 | 0.963383  |
| O | -3.624062 | -0.133357 | 1.111864  |
| H | -3.584652 | 0.191093  | 2.025786  |
| H | -3.445700 | 0.669251  | 0.424313  |
| O | -3.095103 | 1.577678  | -0.564549 |
| H | -3.220074 | 2.504055  | -0.312714 |
| H | -2.132241 | 1.435007  | -0.676521 |

-----  
E + ZPE = -839.996889 a.u.  
H(298K) = -839.978739 a.u.  
G(298K) = -840.040667 a.u.

### TS-6-BP-2W

|   |           |           |           |
|---|-----------|-----------|-----------|
| O | 0.348488  | -0.685035 | -0.042047 |
| C | -0.841442 | -1.506038 | -0.236952 |
| C | -2.038222 | -0.821406 | 0.421720  |
| C | -2.213451 | 0.576691  | -0.157986 |
| C | -0.944524 | 1.390055  | 0.056195  |
| C | 0.258539  | 0.607927  | -0.436865 |
| O | -0.552248 | -2.747997 | 0.272351  |
| O | -3.221463 | -1.537797 | 0.148621  |
| O | -3.254524 | 1.280177  | 0.482004  |
| O | -0.971320 | 2.620526  | -0.616876 |
| C | 1.414947  | 1.234449  | -0.893946 |
| O | 2.537330  | 1.782831  | 0.937578  |
| H | -1.858823 | -0.745789 | 1.504212  |
| H | -2.406731 | 0.497441  | -1.238678 |
| H | -0.785234 | 1.528657  | 1.136631  |
| H | 0.313706  | 0.719992  | -1.686567 |
| H | -0.995476 | -1.618984 | -1.315282 |
| H | -0.544522 | -2.719895 | 1.241946  |
| H | -3.287398 | -2.295113 | 0.746016  |
| H | -4.094615 | 0.852749  | 0.263699  |
| H | -1.700501 | 3.146923  | -0.258610 |
| H | 1.360949  | 2.283848  | -1.157173 |
| H | 2.255436  | 0.619225  | -1.200472 |
| H | 2.927340  | 2.660951  | 0.831049  |
| H | 3.289667  | 1.143444  | 0.948521  |

|   |          |           |           |
|---|----------|-----------|-----------|
| O | 4.426686 | -0.136339 | 0.728894  |
| H | 4.684886 | -0.584015 | 1.544197  |
| H | 3.962101 | -0.803339 | 0.180719  |
| O | 2.919403 | -1.723044 | -0.951610 |
| H | 3.190670 | -2.634980 | -1.118123 |
| H | 2.014627 | -1.767765 | -0.606401 |

-----  
E + ZPE = -839.927617 a.u.  
H(298K) = -839.907044 a.u.  
G(298K) = -839.974667 a.u.

### PC-6-BP-2W

|   |           |           |           |
|---|-----------|-----------|-----------|
| O | 0.606447  | -0.131301 | -0.824604 |
| C | -0.296647 | -1.365525 | -0.734914 |
| C | -1.587099 | -1.061575 | 0.030941  |
| C | -2.080388 | 0.350004  | -0.248782 |
| C | -1.004895 | 1.329960  | 0.203821  |
| C | 0.306491  | 1.035672  | -0.460170 |
| O | 0.477420  | -2.340690 | -0.208457 |
| O | -2.576363 | -1.964412 | -0.410956 |
| O | -3.231066 | 0.648202  | 0.504740  |
| O | -1.332632 | 2.668909  | -0.041671 |
| C | 1.288737  | 2.102244  | -0.690630 |
| O | 0.839513  | -0.845510 | 1.972982  |
| H | -1.408946 | -1.170047 | 1.106512  |
| H | -2.270408 | 0.481080  | -1.323417 |
| H | -0.800422 | 1.155484  | 1.276922  |
| H | 0.843790  | 2.794159  | -1.416799 |
| H | -0.499138 | -1.570413 | -1.786431 |
| H | 0.657953  | -2.097873 | 0.732212  |
| H | -2.510024 | -2.786794 | 0.092703  |
| H | -3.980499 | 0.160639  | 0.135121  |
| H | -2.068196 | 2.909059  | 0.539746  |
| H | 1.419856  | 2.667932  | 0.236916  |
| H | 2.226970  | 1.693436  | -1.060871 |
| H | 0.730962  | -1.061682 | 2.907474  |
| H | 1.718599  | -0.409677 | 1.876423  |
| O | 3.149280  | 0.418712  | 1.352870  |
| H | 3.919103  | 0.242867  | 1.908539  |
| H | 3.382945  | 0.105510  | 0.453612  |
| O | 3.536770  | -0.400049 | -1.261892 |
| H | 4.331866  | -0.915386 | -1.451751 |
| H | 2.793445  | -0.973853 | -1.492615 |

-----  
E + ZPE = -839.982486 a.u.  
H(298K) = -839.960735 a.u.  
G(298K) = -840.030642 a.u.

### In Figure 6S

#### RC-5-BP-2W

|   |           |           |           |
|---|-----------|-----------|-----------|
| C | -0.454095 | 1.139174  | -0.480712 |
| O | 0.590568  | 0.450976  | 0.236495  |
| C | 0.645005  | -0.956453 | -0.031425 |
| C | -0.672881 | -1.597286 | 0.389244  |
| C | -1.840935 | -0.936533 | -0.329088 |
| C | -1.822393 | 0.563385  | -0.093365 |
| O | 1.732948  | -1.481321 | 0.655491  |

|   |           |           |           |
|---|-----------|-----------|-----------|
| O | -0.694163 | -2.966272 | 0.040087  |
| O | -3.069160 | -1.455196 | 0.142411  |
| C | -0.319797 | 2.614501  | -0.143491 |
| O | -0.514460 | 2.870260  | 1.237322  |
| O | -2.823738 | 1.150742  | -0.905500 |
| H | -0.795709 | -1.465410 | 1.474211  |
| H | -1.738816 | -1.123347 | -1.410052 |
| H | -2.014962 | 0.760869  | 0.968316  |
| H | -0.299206 | 1.001060  | -1.560464 |
| H | 0.837509  | -1.116120 | -1.099679 |
| H | 1.577453  | -1.442974 | 1.612703  |
| H | -0.172568 | -3.469578 | 0.679219  |
| H | -3.062089 | -2.411907 | -0.004273 |
| H | -1.089950 | 3.168681  | -0.684465 |
| H | 0.658356  | 2.979453  | -0.478009 |
| H | 0.202808  | 2.454208  | 1.734905  |
| H | -3.213894 | 1.904418  | -0.445123 |
| O | 3.003223  | 1.334756  | -0.291177 |
| H | 3.579673  | 0.397140  | -0.439028 |
| H | 3.382004  | 1.868281  | 0.427049  |
| H | 2.060655  | 1.073218  | -0.040774 |
| O | 4.076152  | -0.806167 | -0.636415 |
| H | 4.979672  | -0.925023 | -0.307641 |
| H | 3.488678  | -1.395922 | -0.123599 |

-----  
E + ZPE = -839.991962 a.u.  
H(298K) = -839.973359 a.u.  
G(298K) = -840.036892 a.u.

#### TS-5-BP-Iso-1-2W

|   |           |           |           |
|---|-----------|-----------|-----------|
| C | 1.236871  | -1.162962 | -0.568298 |
| O | -0.681096 | -0.592465 | 0.458121  |
| C | -1.064391 | 0.706576  | 0.086581  |
| C | 0.089298  | 1.658854  | 0.405640  |
| C | 1.351402  | 1.371674  | -0.411582 |
| C | 1.915028  | 0.020129  | -0.060246 |
| O | -2.229619 | 1.108330  | 0.768597  |
| O | -0.270389 | 2.983680  | 0.071573  |
| O | 2.356740  | 2.316113  | -0.115811 |
| C | 1.382744  | -2.516761 | 0.036142  |
| O | 1.978918  | -2.509968 | 1.304955  |
| O | 2.885761  | -0.443088 | -1.035890 |
| H | 0.324217  | 1.575608  | 1.478292  |
| H | 1.098796  | 1.394980  | -1.482145 |
| H | 2.293838  | -0.046671 | 0.959106  |
| H | 0.737960  | -1.082702 | -1.530192 |
| H | -1.322182 | 0.756446  | -0.978806 |
| H | -2.091026 | 1.013353  | 1.724721  |
| H | -0.988385 | 3.270485  | 0.653074  |
| H | 1.973161  | 3.198486  | -0.229907 |
| H | 2.006850  | -3.113272 | -0.637642 |
| H | 0.385966  | -2.973956 | 0.030230  |
| H | 1.323542  | -2.242016 | 1.964449  |
| H | 3.620654  | -0.900239 | -0.588121 |
| O | -2.497543 | -2.163101 | -0.571369 |
| H | -3.298331 | -1.592691 | -0.602035 |
| H | -2.726672 | -2.931003 | -0.031536 |
| H | -1.371480 | -1.235272 | 0.112449  |
| O | -4.347085 | -0.164073 | -0.582451 |
| H | -5.202112 | -0.243025 | -0.141212 |
| H | -3.796007 | 0.403002  | -0.011962 |

E + ZPE = -839.929456 a.u.  
H(298K) = -839.909851 a.u.  
G(298K) = -839.975781 a.u.

#### PC-5-BP-Iso-1-2W

|   |           |           |           |
|---|-----------|-----------|-----------|
| C | 1.614471  | -0.936261 | -0.589877 |
| O | -0.788975 | -0.584991 | 0.850681  |
| C | -1.335315 | 0.504379  | 0.182108  |
| C | -0.390694 | 1.690803  | 0.372690  |
| C | 0.918910  | 1.544763  | -0.409995 |
| C | 1.703206  | 0.357530  | 0.064494  |
| O | -2.622570 | 0.834153  | 0.677120  |
| O | -0.967169 | 2.879112  | -0.128676 |
| O | 1.740825  | 2.674776  | -0.209804 |
| C | 2.067645  | -2.198919 | 0.102703  |
| O | 3.227042  | -1.926729 | 0.865853  |
| O | 2.776662  | -0.029670 | -0.924966 |
| H | -0.166815 | 1.786364  | 1.446592  |
| H | 0.678551  | 1.423156  | -1.476102 |
| H | 2.111687  | 0.410281  | 1.070665  |
| H | 0.969379  | -1.032394 | -1.458328 |
| H | -1.488124 | 0.296752  | -0.885174 |
| H | -2.577907 | 0.883218  | 1.645444  |
| H | -1.807630 | 3.028069  | 0.327948  |
| H | 1.204655  | 3.462112  | -0.388814 |
| H | 2.325295  | -2.943577 | -0.652680 |
| H | 1.236617  | -2.569634 | 0.708938  |
| H | 2.992326  | -1.770695 | 1.790553  |
| H | 3.565021  | -0.362357 | -0.426499 |
| O | -1.892592 | -2.632142 | -0.507510 |
| H | -2.806510 | -2.280134 | -0.573625 |
| H | -1.957819 | -3.485025 | -0.059505 |
| H | -1.154329 | -1.411888 | 0.451657  |
| O | -4.192647 | -1.136595 | -0.581173 |
| H | -4.995828 | -1.434346 | -0.136322 |
| H | -3.842504 | -0.396984 | -0.049691 |

-----  
E + ZPE = -839.938838 a.u.  
H(298K) = -839.919000 a.u.  
G(298K) = -839.985648 a.u.

#### TS-5-BP-Iso-2-2W

|   |           |           |           |
|---|-----------|-----------|-----------|
| C | 2.622400  | 0.638879  | -0.027866 |
| O | 3.473973  | 0.687203  | -1.116384 |
| C | 1.154434  | 0.581062  | -0.480611 |
| O | 0.871633  | 1.781972  | -1.170119 |
| C | 0.172843  | 0.427592  | 0.677914  |
| O | 0.530004  | 1.392023  | 1.659420  |
| C | -1.323025 | 0.604179  | 0.329246  |
| O | -1.955753 | 0.567383  | 1.607450  |
| C | -1.917043 | -0.482023 | -0.591247 |
| C | -3.422232 | -0.361993 | -0.821274 |
| O | -4.120665 | -0.560651 | 0.405057  |
| O | -1.270349 | -0.304627 | -1.830752 |
| O | 2.633135  | -0.836438 | 1.241017  |
| O | 2.057708  | -2.961714 | 0.185715  |
| H | 1.042675  | -0.285228 | -1.145710 |
| H | 0.292229  | -0.585144 | 1.092824  |
| H | -1.464083 | 1.587952  | -0.143346 |

|   |           |           |           |
|---|-----------|-----------|-----------|
| H | -1.700136 | -1.469425 | -0.161194 |
| H | 2.831031  | 1.538533  | 0.551581  |
| H | 3.303522  | -0.052818 | -1.721243 |
| H | 1.514975  | 1.884925  | -1.885795 |
| H | -0.194085 | 1.430505  | 2.301893  |
| H | -3.715431 | -1.111872 | -1.562973 |
| H | -3.634380 | 0.635722  | -1.227250 |
| H | -5.071311 | -0.557004 | 0.234334  |
| H | -2.913040 | 0.450039  | 1.484815  |
| H | 3.527898  | -0.815943 | 1.623464  |
| H | 2.338057  | -1.992070 | 0.634468  |
| H | -0.848878 | -1.118493 | -2.119603 |
| H | 2.054337  | -2.905782 | -0.786945 |
| H | 1.154869  | -3.201282 | 0.462471  |

-----  
 E + ZPE = -839.939197 a.u.  
 H(298K) = -839.919115 a.u.  
 G(298K) = -839.986518 a.u.

### PC-5-BP-Iso-2-2W

|   |           |           |           |
|---|-----------|-----------|-----------|
| C | 3.632842  | 0.769407  | -0.759499 |
| O | 4.945609  | 0.278091  | -0.508109 |
| C | 2.698256  | -0.094993 | 0.070121  |
| O | 3.049807  | -0.022746 | 1.440976  |
| C | 1.253306  | 0.385485  | -0.040628 |
| C | 0.321384  | -0.415479 | 0.855694  |
| C | -1.157117 | -0.002228 | 0.892540  |
| C | -1.539597 | -1.441107 | 0.491682  |
| O | -2.277215 | -1.578286 | -0.612145 |
| O | 0.853566  | 0.227461  | -1.390738 |
| O | -0.002398 | -1.726838 | 0.197347  |
| O | -1.449394 | 0.948871  | -0.081089 |
| H | 3.378469  | 0.693612  | -1.821193 |
| H | 3.543665  | 1.813800  | -0.435144 |
| H | 2.765357  | -1.135443 | -0.285071 |
| H | 1.193906  | 1.432890  | 0.282250  |
| H | 0.752149  | -0.650178 | 1.826861  |
| H | -1.532779 | 0.277319  | 1.878512  |
| H | -1.751535 | -2.139609 | 1.298627  |
| H | 5.591162  | 0.937017  | -0.792113 |
| H | -2.265799 | 1.446819  | 0.183652  |
| H | 0.178304  | -1.636125 | -0.771630 |
| H | 0.019048  | 0.711588  | -1.508787 |
| H | 4.011472  | -0.128380 | 1.495011  |
| H | -2.610811 | -2.486867 | -0.696855 |
| O | -4.803663 | -0.004925 | -0.721668 |
| H | -5.117306 | 0.162947  | -1.619561 |
| H | -3.965184 | -0.482903 | -0.820440 |
| O | -3.720422 | 2.070030  | 0.694229  |
| H | -4.311861 | 1.475103  | 0.186325  |
| H | -3.899814 | 2.968628  | 0.389679  |

-----  
 E + ZPE = -839.943928 a.u.  
 H(298K) = -839.924118 a.u.  
 G(298K) = -839.991401 a.u.

### In Figure 8S

### RC-2(12T) [RC-n(12T), n = 2]

| -----  |                         |           |           |
|--------|-------------------------|-----------|-----------|
| Atomic | Coordinates (Angstroms) |           |           |
| Number | X                       | Y         | Z         |
| -----  |                         |           |           |
| 8      | -0.332397               | -0.149269 | -2.307754 |
| 14     | 0.121666                | 1.342497  | -1.651990 |
| 13     | 0.320753                | -1.575956 | -1.258539 |
| 8      | -0.083947               | -0.959124 | 0.327289  |
| 8      | 2.015592                | -1.815023 | -1.452652 |
| 8      | -0.502239               | -3.147517 | -1.397408 |
| 8      | 0.002228                | 2.571627  | -2.733877 |
| 8      | -0.810362               | 1.717168  | -0.366653 |
| 8      | 1.673714                | 1.108190  | -1.244190 |
| 14     | 0.618237                | 4.134800  | -2.156838 |
| 14     | -0.271626               | 3.014070  | 0.700663  |
| 14     | 2.625879                | 2.333316  | -0.425407 |
| 14     | 0.487755                | -1.861493 | 1.698304  |
| 14     | 2.815013                | -2.742005 | -0.220725 |
| 14     | 0.092561                | -4.328373 | -0.225050 |
| 8      | -0.129263               | -3.430754 | 1.259932  |
| 8      | 1.830795                | -4.175850 | -0.338068 |
| 8      | 2.153798                | -2.106711 | 1.263026  |
| 1      | -0.461584               | -5.646790 | -0.295637 |
| 8      | -0.210851               | 4.146225  | -0.622754 |
| 8      | 1.435349                | 2.706268  | 0.783540  |
| 8      | -1.081298               | 3.190885  | 2.157872  |
| 1      | 0.549895                | 5.274029  | -3.014847 |
| 14     | -1.724593               | 2.661517  | 3.672277  |
| 8      | -0.884491               | 1.242511  | 4.103387  |
| 8      | 4.505558                | -2.682257 | -0.314244 |
| 14     | 5.991089                | -1.883083 | -0.617327 |
| 8      | 5.833295                | -0.254248 | -0.094245 |
| 8      | 0.156522                | -1.184051 | 3.211455  |
| 1      | -1.472865               | 3.702022  | 4.643443  |
| 1      | -3.136833               | 2.399881  | 3.523971  |
| 1      | 7.027248                | -2.518522 | 0.166334  |
| 1      | 6.315492                | -1.900032 | -2.025177 |
| 8      | 4.211533                | 2.029154  | 0.004650  |
| 14     | 5.704029                | 1.328613  | 0.518170  |
| 1      | -0.841861               | -0.866291 | 5.562195  |
| 14     | -0.041208               | -0.175751 | 4.575807  |
| 1      | 6.764903                | 2.144451  | -0.028333 |
| 1      | 1.246057                | 0.205310  | 5.111365  |
| 1      | 5.725557                | 1.323343  | 1.962635  |
| 8      | 2.152198                | 3.578352  | -1.552321 |
| 1      | -1.271813               | -0.115590 | -2.695842 |
| 8      | -2.723368               | 0.307602  | -3.037470 |
| 1      | -2.944041               | 1.236036  | -3.212201 |
| 6      | -3.747625               | -0.252973 | -2.215896 |
| 6      | -4.228720               | 0.773585  | -1.212159 |
| 6      | -5.270052               | 0.144222  | -0.304679 |
| 6      | -4.666024               | -1.105714 | 0.348989  |
| 8      | -4.239928               | -1.997849 | -0.670319 |
| 6      | -3.184302               | -1.463717 | -1.476214 |
| 6      | -5.667813               | -1.877304 | 1.189513  |
| 8      | -6.779652               | -2.284718 | 0.418567  |
| 1      | -5.158757               | -2.739458 | 1.639599  |
| 1      | -6.049060               | -1.246112 | 1.997893  |
| 1      | -6.434702               | -2.788403 | -0.331456 |
| 1      | -4.572002               | -0.588326 | -2.856994 |
| 1      | -2.376024               | -1.149414 | -0.786179 |
| 8      | -2.761623               | -2.391215 | -2.381107 |
| 1      | -1.972686               | -2.879378 | -2.009655 |
| 1      | -3.369712               | 1.097457  | -0.599744 |

|   |           |           |           |
|---|-----------|-----------|-----------|
| 8 | -4.738366 | 1.870930  | -1.948301 |
| 1 | -5.045876 | 2.530905  | -1.313922 |
| 1 | -3.813230 | -0.802342 | 0.979452  |
| 1 | -6.140458 | -0.151438 | -0.904795 |
| 8 | -5.630422 | 1.132053  | 0.648659  |
| 1 | -6.512455 | 0.940939  | 0.985099  |

-----  
 E + ZPE = -1751.242959 a.u.

H(298K) = -1751.192280 a.u.

G(298K) = -1751.328108 a.u.

**TS-2(12T) [TS-n(12T), n = 2]**

| Atomic Number | Coordinates (Angstroms) |           |           |
|---------------|-------------------------|-----------|-----------|
|               | X                       | Y         | Z         |
| 8             | -0.267438               | -0.141551 | -2.357905 |
| 14            | -0.086302               | 1.293050  | -1.616809 |
| 13            | 0.557265                | -1.451560 | -1.441362 |
| 8             | -0.010617               | -1.147776 | 0.216040  |
| 8             | 2.284277                | -1.495905 | -1.499126 |
| 8             | -0.047581               | -3.138169 | -1.746602 |
| 8             | -0.398419               | 2.619442  | -2.567572 |
| 8             | -1.104027               | 1.467131  | -0.313812 |
| 8             | 1.464080                | 1.425159  | -1.087731 |
| 14            | -0.079347               | 4.211992  | -1.847451 |
| 14            | -0.828555               | 2.759730  | 0.854639  |
| 14            | 2.146897                | 2.731997  | -0.151168 |
| 14            | 0.641903                | -2.095443 | 1.511530  |
| 14            | 3.162444                | -2.402308 | -0.319352 |
| 14            | 0.714110                | -4.340551 | -0.683425 |
| 8             | 0.272299                | -3.678243 | 0.871651  |
| 8             | 2.411058                | -3.943320 | -0.665313 |
| 8             | 2.348851                | -2.066509 | 1.186925  |
| 1             | 0.361413                | -5.704612 | -0.944293 |
| 8             | -0.968351               | 4.012742  | -0.352544 |
| 8             | 0.894436                | 2.808973  | 1.059770  |
| 8             | -1.741010               | 2.619028  | 2.264679  |
| 1             | -0.344282               | 5.367951  | -2.646846 |
| 14            | -2.454981               | 1.744460  | 3.564868  |
| 8             | -1.388278               | 0.490703  | 4.008562  |
| 8             | 4.822360                | -2.057357 | -0.297029 |
| 14            | 6.132613                | -0.958967 | -0.442688 |
| 8             | 5.660207                | 0.564457  | 0.193374  |
| 8             | 0.117520                | -1.639454 | 3.058395  |
| 1             | -2.655245               | 2.654482  | 4.669080  |
| 1             | -3.711776               | 1.166093  | 3.126831  |
| 1             | 7.234073                | -1.461629 | 0.349776  |
| 1             | 6.522390                | -0.799660 | -1.825272 |
| 8             | 3.749208                | 2.635201  | 0.333073  |
| 14            | 5.276016                | 2.068525  | 0.898162  |
| 1             | -0.876065               | -1.575728 | 5.426323  |
| 14            | -0.247192               | -0.715033 | 4.448157  |
| 1             | 6.265751                | 3.044122  | 0.497561  |
| 1             | 0.936205                | -0.082510 | 4.984184  |
| 1             | 5.212460                | 1.943221  | 2.336738  |
| 8             | 1.522956                | 3.988595  | -1.195251 |
| 1             | -1.511537               | -0.053476 | -3.510078 |
| 8             | -2.404707               | 0.126596  | -3.900653 |
| 1             | -2.528156               | 1.086451  | -3.874825 |
| 6             | -3.663641               | -0.764905 | -2.266848 |
| 6             | -3.983504               | 0.475369  | -1.536405 |
| 6             | -4.730454               | 0.029028  | -0.252010 |
| 6             | -3.933975               | -1.112204 | 0.381382  |

|   |           |           |           |
|---|-----------|-----------|-----------|
| 8 | -3.806192 | -2.094640 | -0.647718 |
| 6 | -2.744453 | -1.738585 | -1.616069 |
| 6 | -4.657526 | -1.762255 | 1.547322  |
| 8 | -5.958818 | -2.181710 | 1.192497  |
| 1 | -4.051412 | -2.596324 | 1.920559  |
| 1 | -4.765320 | -1.029672 | 2.354425  |
| 1 | -5.878934 | -2.880678 | 0.530678  |
| 1 | -4.318333 | -1.135203 | -3.051369 |
| 1 | -1.938828 | -1.269136 | -1.037828 |
| 8 | -2.388085 | -2.761932 | -2.384430 |
| 1 | -1.400058 | -3.053141 | -2.130660 |
| 1 | -3.049774 | 0.960256  | -1.205248 |
| 8 | -4.772543 | 1.321619  | -2.329715 |
| 1 | -5.008401 | 2.084410  | -1.784670 |
| 1 | -2.941679 | -0.757367 | 0.699305  |
| 1 | -5.716946 | -0.354512 | -0.543934 |
| 8 | -4.850242 | 1.179937  | 0.546970  |
| 1 | -5.612680 | 1.089790  | 1.130274  |

-----  
 E + ZPE = -1751.172245 a.u.

H(298K) = -1751.121179 a.u.

G(298K) = -1751.255925 a.u.

**PC-2(12T) [PC-n(12T), n = 2]**

| Atomic Number | Coordinates (Angstroms) |           |           |
|---------------|-------------------------|-----------|-----------|
|               | X                       | Y         | Z         |
| 8             | -0.489697               | 0.196116  | -2.150199 |
| 14            | 0.413373                | 1.441873  | -1.654442 |
| 13            | -0.209939               | -1.243427 | -1.194309 |
| 8             | -0.605135               | -0.821376 | 0.477399  |
| 8             | 1.297234                | -2.072219 | -1.274526 |
| 8             | -1.414658               | -2.760886 | -1.393982 |
| 8             | 0.525451                | 2.796659  | -2.611581 |
| 8             | -0.112458               | 2.015128  | -0.181572 |
| 8             | 1.959795                | 0.895899  | -1.423702 |
| 14            | 1.617732                | 4.104299  | -2.102927 |
| 14            | 0.848159                | 3.115692  | 0.799907  |
| 14            | 3.272449                | 1.807166  | -0.709091 |
| 14            | -0.207788               | -1.856624 | 1.809164  |
| 14            | 1.924378                | -3.183097 | -0.118686 |
| 14            | -1.085066               | -4.126960 | -0.223302 |
| 8             | -1.160091               | -3.220026 | 1.233481  |
| 8             | 0.613573                | -4.335336 | -0.359284 |
| 8             | 1.343619                | -2.508223 | 1.375521  |
| 1             | -1.963290               | -5.231213 | -0.444581 |
| 8             | 1.044166                | 4.303424  | -0.462677 |
| 8             | 2.429794                | 2.398823  | 0.695796  |
| 8             | 0.244526                | 3.413166  | 2.341580  |
| 1             | 1.721094                | 5.256400  | -2.942952 |
| 14            | -0.585865               | 3.111897  | 3.817106  |
| 8             | -0.410810               | 1.452913  | 4.202210  |
| 8             | 3.560938                | -3.559898 | -0.231821 |
| 14            | 5.216387                | -3.279132 | -0.608630 |
| 8             | 5.559590                | -1.628997 | -0.313779 |
| 8             | -0.384195               | -1.199970 | 3.348296  |
| 1             | 0.040456                | 3.904808  | 4.851071  |
| 1             | -1.985609               | 3.436953  | 3.672374  |
| 1             | 6.017796                | -4.095120 | 0.275689  |
| 1             | 5.465521                | -3.599446 | -1.995078 |
| 8             | 4.752358                | 1.049319  | -0.475358 |
| 14            | 6.038661                | -0.007921 | -0.055545 |

```

1      -1.369950  -0.481585  5.605733
14     -0.271120  -0.171020  4.719307
1      7.166129  0.292465  -0.908743
1      1.007051  -0.368221  5.363849
1      6.362724  0.176627  1.340672
8      3.069172  3.209226  -1.728773
1      -1.654054  3.096759  -2.409875
8      -2.484813  2.702282  -2.117085
1      -2.347844  2.417623  -1.197219
6      -4.148431  0.276077  -1.736335
6      -3.581620  0.027980  -0.320664
6      -4.879670  -0.092720  0.467294
6      -5.736567  -0.924004  -0.471025
8      -5.331805  -0.520706  -1.788988
6      -3.199220  -0.170609  -2.833406
6      -7.232909  -0.694055  -0.354015
8      -7.569770  0.642373  -0.656225
1      -7.762066  -1.392762  -1.016514
1      -7.546470  -0.886595  0.676305
1      -7.218570  0.825750  -1.537690
1      -4.386322  1.337283  -1.869733
1      -2.737589  0.614571  -3.446221
8      -2.942795  -1.346057  -3.015468
1      -2.143949  -2.558976  -2.002414
1      -3.080159  -0.951213  -0.292557
8      -2.743861  1.027409  0.181913
1      -1.844051  0.663311  0.321145
1      -5.507091  -1.988936  -0.318518
1      -5.315767  0.909584  0.590783
8      -4.739586  -0.744068  1.707549
1      -4.140799  -0.215725  2.249521
    
```

-----  
 E + ZPE = -1751.256732 a.u.  
 H(298K) = -1751.204291 a.u.  
 G(298K) = -1751.343492 a.u.

### In Figure 9S

#### RC-3(12T) [RC-n(12T), n = 3]

```

-----
Atomic      Coordinates (Angstroms)
Number      X          Y          Z
-----
8          -0.531338  -0.121011  -2.227583
14         -0.280434  1.400201  -1.536325
13         0.392831  -1.452427  -1.260891
8          0.066192  -0.987294  0.380975
8          2.077120  -1.482904  -1.620226
8          -0.287556  -3.086509  -1.477418
8          -0.657399  2.657678  -2.518260
8          -1.172801  1.527350  -0.180726
8          1.312533  1.367315  -1.241123
14         0.810151  -1.931271  1.637608
14         3.069292  -2.383106  -0.513281
14         0.558141  -4.270354  -0.466212
14        -0.238285  4.246821  -1.835931
14        -0.766328  2.797173  0.973502
14         2.122894  2.650786  -0.361340
1         -0.528727  5.422783  -2.591963
8          1.395393  3.880140  -1.365044
8          -0.955062  4.009888  -0.266791
    
```

```

8          0.969950  2.757691  0.931473
8          0.365435  -3.528711  1.102133
8          2.253878  -3.913607  -0.698245
1          0.149044  -5.634543  -0.620415
8          2.453627  -1.948651  1.056225
8          0.563204  -1.397022  3.219679
14         0.232025  -0.516899  4.645777
8          -0.871531  0.746854  4.285309
14        -2.045367  1.923541  3.908787
8          -1.501126  2.731873  2.477558
14         5.358239  2.015409  0.340582
8          5.668961  0.515670  -0.403065
14         6.037617  -1.031750  -1.053342
8          4.725809  -2.083772  -0.719053
1          6.254987  -0.907145  -2.476603
1          7.217855  -1.539248  -0.388875
1          6.268451  3.007477  -0.186472
1          5.462201  1.906942  1.777291
1         -0.371179  -1.388482  5.628707
1          1.453327  0.072112  5.147999
1         -2.108942  2.913654  4.959719
1         -3.328501  1.309714  3.660727
8          3.760923  2.548317  -0.045658
1         -1.419865  -0.366217  -2.662861
8         -2.727642  -0.884408  -3.231009
1         -2.549311  -1.794080  -3.524891
6         -3.755472  -0.992934  -2.233740
6         -4.146662  0.378371  -1.734278
6         -5.266490  0.176905  -0.709690
8         -4.837616  -0.653921  0.333393
6         -4.445676  -1.965309  -0.075254
6         -3.285457  -1.861642  -1.072983
6         -4.080717  -2.698130  1.204028
8         -3.114655  -1.990749  1.945864
1         -3.402274  -1.068754  1.993982
1         -4.996373  -2.852255  1.792087
1         -3.654124  -3.671495  0.948147
1         -5.290190  -2.481616  -0.562001
1         -6.132661  -0.289431  -1.217557
8         -5.633965  1.381613  -0.121661
1         -5.673890  2.040976  -0.828331
8         -4.684264  1.213756  -2.743273
1         -3.993883  1.426969  -3.382594
1         -3.303329  0.864585  -1.217348
1         -4.622457  -1.466775  -2.714836
1         -2.439111  -1.380359  -0.549977
8         -2.924538  -3.116693  -1.587064
1         -1.934484  -3.217699  -1.509679
    
```

-----  
 E + ZPE = -1751.236731 a.u.  
 H(298K) = -1751.186054 a.u.  
 G(298K) = -1751.321883 a.u.

#### TS-3(12T) [TS-n(12T), n = 3]

```

-----
Atomic      Coordinates (Angstroms)
Number      X          Y          Z
-----
8          -0.603079  -0.214358  -2.175868
14         -0.390845  1.258630  -1.500635
13         0.365682  -1.468001  -1.300617
8          0.076437  -1.089715  0.390693
8          2.054222  -1.470071  -1.676983
    
```



|    |           |           |           |
|----|-----------|-----------|-----------|
| 8  | -0.217587 | -3.188336 | -1.435303 |
| 8  | -0.826419 | 2.555068  | -2.436194 |
| 8  | -1.281015 | 1.410451  | -0.114934 |
| 8  | 1.204947  | 1.426964  | -1.148651 |
| 14 | 0.941458  | -1.954974 | 1.617336  |
| 14 | 3.149201  | -2.263696 | -0.598968 |
| 14 | 0.776635  | -4.303013 | -0.464488 |
| 14 | -0.504645 | 4.165426  | -1.760308 |
| 14 | -0.931442 | 2.715479  | 1.015692  |
| 14 | 1.929387  | 2.770521  | -0.296478 |
| 1  | -0.887697 | 5.304355  | -2.536095 |
| 8  | 1.164168  | 3.996350  | -1.281176 |
| 8  | -1.226101 | 3.953565  | -0.180253 |
| 8  | 0.803514  | 2.821836  | 1.031161  |
| 8  | 0.567825  | -3.585661 | 1.110610  |
| 8  | 2.433469  | -3.853011 | -0.756955 |
| 1  | 0.440525  | -5.688602 | -0.613579 |
| 8  | 2.568365  | -1.884168 | 0.998199  |
| 8  | 0.715323  | -1.436527 | 3.211778  |
| 14 | 0.476714  | -0.483429 | 4.609502  |
| 8  | -0.800124 | 0.623433  | 4.312800  |
| 14 | -2.120512 | 1.619877  | 3.900812  |
| 8  | -1.671520 | 2.552929  | 2.520515  |
| 14 | 5.187433  | 2.241999  | 0.370120  |
| 8  | 5.562994  | 0.796153  | -0.452103 |
| 14 | 5.993851  | -0.693051 | -1.188852 |
| 8  | 4.776123  | -1.853090 | -0.849911 |
| 1  | 6.140124  | -0.496609 | -2.613507 |
| 1  | 7.235050  | -1.152365 | -0.603586 |
| 1  | 6.072244  | 3.287448  | -0.095492 |
| 1  | 5.303361  | 2.054418  | 1.798342  |
| 1  | 0.083119  | -1.341214 | 5.705900  |
| 1  | 1.675071  | 0.257480  | 4.932373  |
| 1  | -2.412003 | 2.533174  | 4.981841  |
| 1  | -3.265263 | 0.796107  | 3.569991  |
| 8  | 3.578709  | 2.740621  | 0.007004  |
| 1  | -1.626513 | -0.352895 | -3.255350 |
| 8  | -2.476361 | -0.445201 | -3.810330 |
| 1  | -2.328011 | -1.142248 | -4.459419 |
| 6  | -3.711209 | -1.129431 | -2.022520 |
| 6  | -4.120591 | 0.248381  | -1.712457 |
| 6  | -5.240665 | 0.103457  | -0.629638 |
| 8  | -4.754804 | -0.706091 | 0.392964  |
| 6  | -4.349001 | -1.968712 | -0.039307 |
| 6  | -3.006313 | -1.900654 | -1.042540 |
| 6  | -3.910063 | -2.749756 | 1.198485  |
| 8  | -2.989689 | -2.034008 | 1.964989  |
| 1  | -3.348520 | -1.154777 | 2.148162  |
| 1  | -4.827972 | -2.975550 | 1.761804  |
| 1  | -3.439652 | -3.681478 | 0.881238  |
| 1  | -5.147749 | -2.512992 | -0.562101 |
| 1  | -6.123808 | -0.358418 | -1.104412 |
| 8  | -5.547609 | 1.327434  | -0.074037 |
| 1  | -5.704498 | 1.951276  | -0.797064 |
| 8  | -4.702697 | 0.927041  | -2.788707 |
| 1  | -4.035154 | 0.962087  | -3.493414 |
| 1  | -3.300746 | 0.807492  | -1.233808 |
| 1  | -4.246671 | -1.675499 | -2.796263 |
| 1  | -2.264893 | -1.357136 | -0.431268 |
| 8  | -2.683627 | -3.168086 | -1.412346 |
| 1  | -1.622188 | -3.260694 | -1.416376 |

E + ZPE = -1751.170958 a.u.  
 H(298K) = -1751.120165 a.u.

G(298K) = -1751.254414 a.u.

**PC-3(12T) [PC-n(12T), n = 3]**

| Atomic Number | Coordinates (Angstroms) |           |           |
|---------------|-------------------------|-----------|-----------|
|               | X                       | Y         | Z         |
| 8             | -1.274255               | -0.048706 | -0.829818 |
| 14            | -0.395903               | 1.319690  | -1.006965 |
| 13            | -0.232773               | -1.288410 | -0.088341 |
| 8             | 0.551592                | -0.649889 | 1.320841  |
| 8             | 0.875904                | -2.175583 | -1.077394 |
| 8             | -1.228492               | -2.754334 | 0.693823  |
| 8             | -0.930144               | 2.446772  | -2.088533 |
| 8             | -0.159553               | 2.105044  | 0.417372  |
| 8             | 1.081908                | 0.794832  | -1.548880 |
| 14            | 1.705404                | -1.484825 | 2.286846  |
| 14            | 2.145939                | -3.121417 | -0.385590 |
| 14            | -0.170488               | -3.933058 | 1.594348  |
| 14            | 0.119027                | 3.849775  | -2.373564 |
| 14            | 1.084907                | 3.329703  | 0.596610  |
| 14            | 2.478684                | 1.824860  | -1.782916 |
| 1             | -0.333245               | 4.858552  | -3.280170 |
| 8             | 1.627888                | 3.035724  | -2.709886 |
| 8             | 0.478539                | 4.298379  | -0.722640 |
| 8             | 2.442856                | 2.632233  | -0.241720 |
| 8             | 0.668039                | -2.861579 | 2.643954  |
| 8             | 1.052841                | -4.238523 | 0.423283  |
| 1             | -0.920004               | -5.022628 | 2.136102  |
| 8             | 2.643016                | -2.258123 | 1.041572  |
| 8             | 2.487415                | -0.618727 | 3.499442  |
| 14            | 3.214135                | 0.644303  | 4.408298  |
| 8             | 2.389044                | 2.111901  | 4.109867  |
| 14            | 1.596832                | 3.608708  | 3.867377  |
| 8             | 1.385395                | 3.837097  | 2.173785  |
| 14            | 5.297199                | 0.145546  | -2.579023 |
| 8             | 4.838983                | -1.498945 | -2.660148 |
| 14            | 4.468751                | -3.168690 | -2.741691 |
| 8             | 3.385940                | -3.533210 | -1.455127 |
| 1             | 3.855378                | -3.477916 | -4.012912 |
| 1             | 5.678942                | -3.934849 | -2.543083 |
| 1             | 5.871806                | 0.530460  | -3.848751 |
| 1             | 6.232687                | 0.334843  | -1.493867 |
| 1             | 3.093057                | 0.316376  | 5.811331  |
| 1             | 4.598081                | 0.776568  | 4.013369  |
| 1             | 2.443396                | 4.675396  | 4.353718  |
| 1             | 0.314786                | 3.608330  | 4.532762  |
| 8             | 3.916064                | 1.129428  | -2.303805 |
| 1             | -2.406569               | -0.433686 | -2.099240 |
| 8             | -3.165189               | -0.739793 | -2.641759 |
| 1             | -2.802393               | -1.313495 | -3.323612 |
| 6             | -5.539568               | -1.085515 | -0.690539 |
| 6             | -5.729342               | 0.333802  | -1.244688 |
| 6             | -7.150938               | 0.678305  | -0.812623 |
| 8             | -7.289687               | 0.077671  | 0.447426  |
| 6             | -6.669842               | -1.204288 | 0.392592  |
| 6             | -4.156962               | -1.331176 | -0.144802 |
| 6             | -6.175415               | -1.496542 | 1.794874  |
| 8             | -5.207818               | -0.537362 | 2.169125  |
| 1             | -5.628678               | 0.331985  | 2.107475  |
| 1             | -7.028752               | -1.494964 | 2.484265  |
| 1             | -5.690691               | -2.475374 | 1.832573  |
| 1             | -7.405183               | -1.957751 | 0.080581  |



|   |           |           |           |
|---|-----------|-----------|-----------|
| 1 | -7.867514 | 0.239215  | -1.530117 |
| 8 | -7.386982 | 2.038748  | -0.643721 |
| 1 | -7.219691 | 2.470037  | -1.491553 |
| 8 | -5.634630 | 0.477147  | -2.632790 |
| 1 | -4.731103 | 0.225327  | -2.894232 |
| 1 | -5.051563 | 1.028138  | -0.718423 |
| 1 | -5.704731 | -1.824344 | -1.480557 |
| 1 | -3.505226 | -0.460283 | 0.025904  |
| 8 | -3.755440 | -2.459692 | 0.092005  |
| 1 | -2.203032 | -2.706523 | 0.535570  |

-----  
 E + ZPE = -1751.256807 a.u.  
 H(298K) = -1751.204256 a.u.  
 G(298K) = -1751.346300 a.u.

### **In Figure 10S**

#### **RC-4(12T) [RC-n(12T), n = 4]**

| Atomic Number | Coordinates (Angstroms) |           |           |
|---------------|-------------------------|-----------|-----------|
|               | X                       | Y         | Z         |
| 8             | 2.708001                | 1.331804  | -2.616711 |
| 6             | 3.336310                | 1.009280  | -1.359117 |
| 6             | 4.151511                | -0.259993 | -1.540821 |
| 6             | 4.925652                | -0.572841 | -0.257394 |
| 6             | 5.763381                | 0.629800  | 0.145249  |
| 6             | 4.257764                | 2.146555  | -0.907029 |
| 8             | 4.923732                | 1.774358  | 0.279706  |
| 6             | 3.495064                | 3.427098  | -0.591248 |
| 1             | 2.552580                | 0.846711  | -0.598419 |
| 1             | 1.322949                | 0.930102  | -2.504700 |
| 1             | 2.762286                | 2.302029  | -2.731739 |
| 1             | 2.810599                | 3.224102  | 0.242776  |
| 1             | 4.200936                | 4.203252  | -0.282258 |
| 8             | 2.787849                | 3.869806  | -1.744813 |
| 1             | 1.831128                | 3.752195  | -1.588623 |
| 1             | 4.984141                | 2.347262  | -1.715662 |
| 1             | 6.520513                | 0.833763  | -0.633209 |
| 8             | 6.344384                | 0.388006  | 1.374042  |
| 1             | 6.932016                | 1.120490  | 1.592751  |
| 8             | 5.773161                | -1.672835 | -0.474831 |
| 1             | 5.273072                | -2.299302 | -1.018546 |
| 1             | 4.882866                | -0.073636 | -2.341748 |
| 8             | 3.398525                | -1.365649 | -1.946761 |
| 1             | 2.635586                | -1.521106 | -1.321971 |
| 1             | 4.217710                | -0.770089 | 0.565111  |
| 8             | 0.351492                | 0.635787  | -2.247044 |
| 13            | 0.070648                | -1.205562 | -1.903313 |
| 14            | -0.420866               | 1.594492  | -1.097092 |
| 8             | 1.182496                | -1.562206 | -0.559033 |
| 8             | 0.168884                | -2.525522 | -3.013877 |
| 8             | -1.554727               | -1.018139 | -1.315133 |
| 8             | -0.012256               | 1.027372  | 0.375910  |
| 8             | -2.021471               | 1.724403  | -1.307032 |
| 8             | 0.165044                | 3.169313  | -1.167278 |
| 14            | -0.564485               | 4.300418  | 0.015228  |
| 14            | -3.092976               | 2.425599  | -0.099329 |
| 14            | -0.681707               | 1.697981  | 1.857838  |
| 14            | -2.290926               | -2.391205 | -0.543757 |
| 14            | 0.643509                | -2.910588 | 0.424369  |

|    |           |           |           |
|----|-----------|-----------|-----------|
| 14 | -0.317481 | -4.072866 | -2.351055 |
| 8  | 0.576409  | -4.101263 | -0.841908 |
| 1  | -0.246385 | -5.227540 | -3.193212 |
| 8  | -1.874617 | -3.651337 | -1.667233 |
| 8  | -1.065203 | -2.684074 | 0.656953  |
| 8  | -3.886989 | -2.227349 | -0.020163 |
| 14 | -5.451627 | -1.858946 | 0.553278  |
| 1  | -6.407919 | -2.794396 | 0.005954  |
| 1  | -5.467943 | -1.869647 | 1.998416  |
| 8  | -5.861730 | -0.286224 | 0.004862  |
| 14 | -6.188139 | 1.290544  | -0.549045 |
| 1  | -6.504457 | 1.301700  | -1.957569 |
| 1  | -7.238472 | 1.890109  | 0.241755  |
| 8  | -4.741841 | 2.198477  | -0.276433 |
| 1  | -0.119176 | 5.657741  | -0.029940 |
| 8  | -0.243385 | 3.332484  | 1.425361  |
| 8  | -2.334514 | 1.810368  | 1.337977  |
| 14 | 2.138670  | -2.578909 | 3.385667  |
| 1  | 3.488824  | -2.092184 | 3.227093  |
| 8  | 1.146546  | -1.305225 | 3.974213  |
| 14 | 0.103661  | -0.110492 | 4.590125  |
| 8  | -0.288456 | 0.995238  | 3.321309  |
| 1  | 0.781345  | 0.647014  | 5.617744  |
| 1  | -1.123462 | -0.694456 | 5.079607  |
| 1  | 2.069846  | -3.683680 | 4.315839  |
| 8  | 1.502445  | -3.071417 | 1.873796  |
| 8  | -2.261525 | 3.958587  | -0.147304 |

-----  
 E + ZPE = -1751.238524 a.u.  
 H(298K) = -1751.188497 a.u.  
 G(298K) = -1751.322723 a.u.

#### **TS-4(12T) [TS-n(12T), n = 4]**

| Atomic Number | Coordinates (Angstroms) |           |           |
|---------------|-------------------------|-----------|-----------|
|               | X                       | Y         | Z         |
| 8             | -2.928518               | -0.012751 | -3.100940 |
| 6             | -3.680780               | -0.039349 | -1.164480 |
| 6             | -3.724405               | 1.335749  | -0.838874 |
| 6             | -4.389994               | 0.665335  | 0.749781  |
| 6             | -5.743549               | 0.013715  | 0.586622  |
| 6             | -4.960184               | -0.799118 | -1.480926 |
| 8             | -5.599729               | -1.120536 | -0.252934 |
| 6             | -4.735703               | -2.147239 | -2.164465 |
| 1             | -2.828649               | -0.618444 | -0.813638 |
| 1             | -1.971444               | -0.191363 | -2.950709 |
| 1             | -3.307112               | -0.720546 | -3.647865 |
| 1             | -3.796903               | -2.590384 | -1.810880 |
| 1             | -5.578294               | -2.785333 | -1.880234 |
| 8             | -4.710589               | -1.959248 | -3.577157 |
| 1             | -4.632236               | -2.816732 | -4.008732 |
| 1             | -5.615095               | -0.175571 | -2.108827 |
| 1             | -6.452985               | 0.724223  | 0.129031  |
| 8             | -6.182423               | -0.420405 | 1.824815  |
| 1             | -7.068872               | -0.789648 | 1.733562  |
| 8             | -4.480500               | 1.864882  | 1.420456  |
| 1             | -3.688897               | 2.381883  | 1.163191  |
| 1             | -4.626062               | 1.856686  | -1.202713 |
| 8             | -2.710391               | 2.066439  | -0.512671 |
| 1             | -1.205845               | 1.949976  | -0.625802 |
| 1             | -3.677463               | -0.024930 | 1.217672  |
| 8             | -0.443327               | -0.431087 | -2.231539 |

```

13  0.615167  0.995157 -2.073013
14  -0.277025 -1.487711 -1.005004
8   -0.198722  2.053132 -0.722681
8   0.986244  2.171777 -3.293139
8   2.099870  0.451894 -1.346078
8   -0.464759 -0.649818  0.417547
8   1.161884 -2.273988 -0.977034
8   -1.443575 -2.683746 -0.943453
14  -1.341317 -3.828958  0.417509
14  1.745339 -3.204115  0.389822
14  -0.210244 -1.345388  2.009019
14  3.358853  1.488667 -0.791565
14  0.898242  3.265370  0.023224
14  2.081829  3.471493 -2.904888
8   1.308794  4.070870 -1.438744
1   2.410030  4.427733 -3.916078
8   3.392603  2.633869 -2.103488
8   2.366211  2.424975  0.309429
8   4.759918  0.784049 -0.174766
14  5.876446 -0.249622  0.613934
1   7.191933 -0.009004  0.064147
1   5.846979 -0.004412  2.037968
8   5.444889 -1.877399  0.307811
14  5.034802 -3.507942  0.007572
1   5.309536 -3.856559 -1.366972
1   5.758457 -4.361256  0.923371
8   3.352900 -3.693761  0.334527
1   -2.309965 -4.881404  0.445969
8   -1.291311 -2.690373  1.739103
8   1.284354 -2.186857  1.725259
14  -0.866906  3.883310  2.783645
1   -2.265544  3.902463  2.419439
8   -0.500857  2.433297  3.615649
14  -0.180446  0.977992  4.449301
8   -0.322165 -0.327634  3.338258
1   -1.164646  0.792440  5.490962
1   1.161321  1.003850  4.984629
1   -0.501315  5.014110  3.605773
8   0.111812  3.901529  1.367902
8   0.351083 -4.256946  0.404365
    
```

-----  
 E + ZPE = -1751.170971 a.u.  
 H(298K) = -1751.119855 a.u.  
 G(298K) = -1751.255163 a.u.

**PC-4(12T) [PC-n(12T), n = 4]**

```

-----
Atomic      Coordinates (Angstroms)
Number      X          Y          Z
-----
8   2.927145 -0.742381 -3.555200
6   4.002129 -0.472312 -0.758482
6   3.495690 -1.804661 -1.252631
6   4.535659 -0.619894  0.700796
6   5.961236 -0.067053  0.608231
6   5.190322  0.071376 -1.561867
8   6.341108 -0.143744 -0.738726
6   5.059002  1.555667 -1.919361
1   3.151739  0.215798 -0.769282
1   2.009419 -0.567974 -3.296857
1   3.328592  0.140320 -3.610851
1   4.925470  2.139715 -1.002090
1   5.988169  1.878412 -2.399187
    
```

```

8   3.995034  1.778464 -2.826608
1   3.204719  2.042194 -2.323910
1   5.343888 -0.502592 -2.482416
1   6.668920 -0.672545  1.181754
8   5.928124  1.263529  1.069882
1   6.807611  1.642051  0.950033
8   4.638567 -1.958980  1.141094
1   3.760528 -2.361244  1.131633
1   4.106576 -2.346741 -1.988968
8   2.489997 -2.317290 -0.795527
1   0.730712 -1.993835 -0.360504
1   3.947061 -0.020038  1.402790
8   0.520782  0.116822 -2.172091
13  -0.808655 -1.041732 -2.029006
14  0.556374  1.227368 -0.995573
8   -0.217808 -2.112302 -0.515892
8   -1.278604 -2.276960 -3.145661
8   -2.233484 -0.275805 -1.399618
8   0.655328  0.441281  0.468141
8   -0.759882  2.206042 -0.976230
8   1.865512  2.285373 -0.997865
14  1.917667  3.507030  0.305725
14  -1.222334  3.282364  0.326373
14  0.494688  1.262687  2.013822
14  -3.635397 -1.096219 -0.827249
14  -1.491719 -3.144037  0.229577
14  -2.557441 -3.387888 -2.743147
8   -1.926795 -3.976955 -1.202961
1   -2.970919 -4.364709 -3.700639
8   -3.764663 -2.327269 -2.052460
8   -2.821700 -2.079151  0.381163
8   -4.941557 -0.170980 -0.306162
14  -5.895450  1.068469  0.400202
1   -7.187608  1.075224 -0.247775
1   -6.015192  0.832788  1.821052
8   -5.130921  2.575209  0.133840
14  -4.418718  4.101438 -0.155936
1   -4.575529  4.477422 -1.541448
1   -5.010771  5.077800  0.730689
8   -2.745244  3.985970  0.235709
1   3.012091  4.427290  0.280662
8   1.729625  2.446046  1.680188
8   -0.888726  2.266270  1.702109
14  -0.034515 -3.971998  3.140052
1   1.293345 -4.495593  2.920094
8   0.060656 -2.409161  3.826086
14  0.148503 -0.881532  4.590914
8   0.489413  0.293966  3.386283
1   1.237483 -0.890214  5.540493
1   -1.114579 -0.579320  5.223145
1   -0.824313 -4.831218  3.991448
8   -0.830241 -3.803230  1.624745
8   0.294295  4.146887  0.290817
    
```

-----  
 E + ZPE = -1751.271442 a.u.  
 H(298K) = -1751.219268 a.u.  
 G(298K) = -1751.357989 a.u.

**In Figure 11S**

**RC-6(12T) [RC-n(12T), n = 6]**

| Atomic Number | Coordinates (Angstroms) |           |           |
|---------------|-------------------------|-----------|-----------|
|               | X                       | Y         | Z         |
| 8             | 3.090830                | -1.932866 | 0.864162  |
| 6             | 3.800072                | -1.241652 | 1.900859  |
| 6             | 5.060211                | -0.621990 | 1.319916  |
| 6             | 4.765104                | 0.576558  | 0.403682  |
| 6             | 6.043116                | 0.978524  | -0.317948 |
| 6             | 6.628199                | -0.213535 | -1.042064 |
| 6             | 6.885125                | -1.325890 | -0.033305 |
| 8             | 7.354151                | -2.480487 | -0.647794 |
| 1             | 7.995142                | -2.206239 | -1.318778 |
| 1             | 5.712932                | -0.281446 | 2.138552  |
| 1             | 4.020253                | 0.275582  | -0.355354 |
| 1             | 3.748981                | -2.420893 | 0.341348  |
| 1             | 2.041639                | -1.203280 | 0.120682  |
| 1             | 4.051235                | -1.958457 | 2.687596  |
| 1             | 3.130493                | -0.472179 | 2.294679  |
| 8             | 5.675448                | -1.684124 | 0.592550  |
| 8             | 7.866455                | 0.080293  | -1.655324 |
| 1             | 7.756208                | 0.890114  | -2.171089 |
| 8             | 5.811786                | 1.996655  | -1.265796 |
| 1             | 5.282567                | 2.676748  | -0.824793 |
| 8             | 4.336737                | 1.690678  | 1.131096  |
| 1             | 3.348287                | 1.654230  | 1.296772  |
| 1             | 7.596961                | -0.971697 | 0.734621  |
| 1             | 6.765401                | 1.328097  | 0.439754  |
| 1             | 5.904769                | -0.586171 | -1.784385 |
| 8             | 1.304265                | -0.698194 | -0.390570 |
| 13            | 0.579738                | 0.817147  | 0.471122  |
| 14            | 0.049700                | -1.589919 | -1.090704 |
| 8             | 0.492846                | -2.580177 | -2.316757 |
| 8             | -0.720932               | -2.465611 | 0.039528  |
| 8             | -0.875477               | -0.378334 | -1.659239 |
| 8             | -0.679536               | 0.092507  | 1.426320  |
| 8             | -0.014762               | 2.118331  | -0.497317 |
| 8             | 1.783770                | 1.516209  | 1.603307  |
| 14            | 1.054888                | 2.733072  | 2.664341  |
| 14            | -0.956670               | 3.325883  | 0.323548  |
| 14            | -1.634366               | 1.112062  | 2.452203  |
| 14            | -0.868958               | -3.352840 | -3.158375 |
| 14            | -2.326163               | -3.092131 | -0.320352 |
| 14            | -2.449764               | -0.670961 | -2.378580 |
| 8             | -1.816612               | -1.918297 | -3.422599 |
| 8             | -3.989981               | -2.222075 | 3.113611  |
| 8             | -3.040639               | -1.738858 | -1.141940 |
| 14            | -3.776406               | -3.826265 | 2.577920  |
| 8             | -3.184082               | -3.762024 | 0.955382  |
| 8             | -1.734187               | -3.899648 | -1.748050 |
| 1             | -0.603612               | -4.254349 | -4.233283 |
| 1             | -2.821819               | -4.525776 | 3.405969  |
| 1             | -5.051169               | -4.507049 | 2.544516  |
| 1             | 1.939255                | 3.355296  | 3.604277  |
| 8             | -1.732236               | 4.393697  | -0.739355 |
| 14            | -2.511460               | 4.773810  | -2.217451 |
| 1             | -3.453696               | 5.846090  | -1.985122 |
| 1             | -1.549679               | 5.136178  | -3.233242 |
| 8             | -3.379951               | 3.383126  | -2.728749 |
| 14            | -4.305211               | 2.032014  | -3.193809 |
| 1             | -4.585050               | 2.107439  | -4.610127 |
| 1             | -5.519697               | 1.958312  | -2.414579 |
| 8             | -3.408462               | 0.581946  | -2.929213 |
| 1             | -5.451838               | -0.105354 | 3.148174  |
| 8             | -2.906021               | 0.352673  | 3.266277  |

|    |           |           |          |
|----|-----------|-----------|----------|
| 14 | -4.229612 | -0.631859 | 3.712701 |
| 1  | -4.300627 | -0.698871 | 5.155449 |
| 8  | 0.218214  | 3.769529  | 1.531947 |
| 8  | -0.332461 | 1.892265  | 3.310706 |
| 8  | -2.022690 | 2.398852  | 1.346159 |

E + ZPE = -1751.241269 a.u.  
 H(298K) = -1751.190766 a.u.  
 G(298K) = -1751.327051 a.u.

### TS-6(12T) [TS-n(12T), n = 6]

| Atomic Number | Coordinates (Angstroms) |           |           |
|---------------|-------------------------|-----------|-----------|
|               | X                       | Y         | Z         |
| 8             | 3.135869                | -1.090344 | -2.119766 |
| 6             | 2.827244                | -0.632876 | 0.369568  |
| 6             | 4.152076                | -0.148692 | 0.437682  |
| 6             | 4.194050                | 1.226297  | -0.533586 |
| 6             | 5.685507                | 1.550428  | -0.657372 |
| 6             | 6.513466                | 0.348484  | -1.054478 |
| 6             | 6.413417                | -0.691139 | 0.051718  |
| 8             | 7.170953                | -1.818439 | -0.218146 |
| 1             | 7.993399                | -1.519887 | -0.631480 |
| 1             | 4.311148                | 0.361089  | 1.407169  |
| 1             | 3.786733                | 0.949032  | -1.510107 |
| 1             | 2.967520                | -1.992106 | -2.419019 |
| 1             | 2.328812                | -0.585245 | -2.337492 |
| 1             | 2.621134                | -1.676315 | 0.158127  |
| 1             | 1.963213                | 0.012909  | 0.591348  |
| 8             | 5.079087                | -1.136916 | 0.139070  |
| 8             | 7.880553                | 0.676068  | -1.180769 |
| 1             | 7.952668                | 1.453315  | -1.750913 |
| 8             | 5.869061                | 2.540753  | -1.642242 |
| 1             | 5.325507                | 3.303963  | -1.402820 |
| 8             | 3.574327                | 2.252519  | 0.088102  |
| 1             | 2.585701                | 2.518030  | -0.220249 |
| 1             | 6.713149                | -0.239544 | 1.016309  |
| 1             | 6.025606                | 1.921299  | 0.323677  |
| 1             | 6.118574                | -0.094489 | -1.981205 |
| 8             | 0.778650                | 0.139489  | -1.746806 |
| 13            | 0.183461                | 1.519035  | -0.780984 |
| 14            | -0.103336               | -1.208111 | -1.527834 |
| 8             | 0.129058                | -2.387739 | -2.677529 |
| 8             | 0.253069                | -1.958324 | -0.087272 |
| 8             | -1.707393               | -0.844515 | -1.524994 |
| 8             | 0.126197                | 0.808046  | 0.851365  |
| 8             | -1.358379               | 2.148563  | -1.243667 |
| 8             | 1.281512                | 2.937809  | -0.511239 |
| 14            | 0.546434                | 4.155762  | 0.569301  |
| 14            | -2.313533               | 3.094292  | -0.162735 |
| 14            | -0.664119               | 1.701704  | 2.113296  |
| 14            | -0.864813               | -3.853990 | -2.558168 |
| 14            | -0.773317               | -3.248954 | 0.535190  |
| 14            | -3.023303               | -1.957104 | -1.230495 |
| 8             | -2.455729               | -3.164585 | -2.358728 |
| 8             | -0.610187               | -1.848025 | 4.207301  |
| 8             | -2.384618               | -2.685348 | 0.219845  |
| 14            | -0.005828               | -3.383138 | 3.772047  |
| 8             | -0.406838               | -3.675528 | 2.122822  |
| 8             | -0.577482               | -4.252207 | -0.877368 |
| 1             | -0.673195               | -4.874493 | -3.541393 |
| 1             | 1.435247                | -3.390624 | 3.899744  |
| 1             | -0.620259               | -4.409315 | 4.582577  |

```

1      1.320623  5.350945  0.729829
8      -3.912100  3.351929 -0.655155
14     -5.369027  2.912116 -1.446723
1      -6.455903  3.642727 -0.832007
1      -5.288921  3.195041 -2.861721
8      -5.641820  1.234636 -1.213759
14     -6.004644 -0.414185 -0.972420
1      -6.987462 -0.831990 -1.947388
1      -6.477132 -0.624301  0.377243
8      -4.594952 -1.372334 -1.216654
1      -2.693186 -0.451903  4.821114
8      -0.816961  0.855809  3.573340
14     -1.256328 -0.340975  4.714088
1      -0.655997 -0.003148  5.986181
8      -1.108192  4.342146  0.067577
8      0.288391  3.159642  1.980663
8      -2.123471  2.276733  1.366062
    
```

-----  
 E + ZPE = -1751.156937 a.u.  
 H(298K) = -1751.105439 a.u.  
 G(298K) = -1751.242023 a.u.

**PC-6(12T) [PC-n(12T), n = 6]**

```

Atomic      Coordinates (Angstroms)
Number      X           Y           Z
-----
8      -2.473193 -2.288773 -2.919507
6      -2.484389  0.466033  2.895651
6      -3.644392  0.385305  2.253988
6      -3.153269 -2.934955  0.332128
6      -4.455552 -2.728629 -0.416303
6      -4.797643 -1.259229 -0.738419
6      -4.986837 -0.382968  0.493630
8      -5.639952  0.811917  0.178228
1      -6.300018  0.612902 -0.501461
1      -4.600324  0.694229  2.672588
1      -2.975947 -2.278055  1.199268
1      -2.630893 -1.391609 -3.244156
1      -1.829247 -2.170153 -2.200102
1      -1.552249  0.182576  2.410892
1      -2.472229  0.852290  3.907730
8      -3.707321 -0.095603  0.970304
8      -6.036820 -1.246338 -1.420920
1      -6.039182 -2.004568 -2.023962
8      -4.562861 -3.504737 -1.573577
1      -3.811701 -3.271685 -2.160658
8      -2.367534 -3.813818  0.032134
1      -0.835870 -3.789448  0.878109
1      -5.561631 -0.924817  1.267899
1      -5.234800 -3.086453  0.278641
1      -4.008093 -0.805610 -1.354084
8      -1.256044 -1.213998 -0.631756
13     0.221535 -1.688027  0.208956
14     -1.142774  0.341855 -1.094958
8      -2.208373  0.831910 -2.269564
8      -1.221768  1.420418  0.136018
8      0.375110  0.473343 -1.755757
8      0.507541 -0.616188  1.550277
8      1.681935 -2.006094 -0.653080
8      0.011933 -3.380637  1.141100
14     1.457336 -3.797041  2.173093
14     3.218607 -2.180558  0.109339
    
```

```

14     1.896860 -0.687446  2.566812
14     -1.975901  2.485159 -2.886165
14     -0.736758  3.096872 -0.036925
14     1.094636  1.964934 -2.321541
8      -0.278583  2.421870 -3.299088
8      0.876824  3.121887  3.601774
8      0.749593  2.957520 -0.933005
14     -0.426096  4.118517  3.108063
8      -0.652508  3.958078  1.409023
8      -1.790381  3.382686 -1.398163
1      -2.899813  2.959962 -3.868981
1      -1.626720  3.732887  3.814057
1      -0.081678  5.498264  3.371501
1      1.278806 -5.046846  2.842073
8      4.540383 -2.082611 -0.933890
14     5.329340 -1.525355 -2.359455
1      6.748953 -1.477958 -2.087367
1      5.035983 -2.408692 -3.464461
8      4.774686  0.056435 -2.708335
14     4.356635  1.663380 -3.118342
1      4.658031  1.880548 -4.515667
1      5.089101  2.576032 -2.269783
8      2.673989  1.926056 -2.894474
1      3.427003  2.811062  3.850570
8      2.113480  0.596939  3.634921
14     2.173207  2.205846  4.238775
1      2.038645  2.140618  5.677299
8      2.740038 -3.593183  1.047818
8      1.614980 -2.349417  3.084782
8      3.160485 -1.045257  1.426962
    
```

-----  
 E + ZPE = -1751.236349 a.u.  
 H(298K) = -1751.182943 a.u.  
 G(298K) = -1751.324581 a.u.
